# Supplementary material for: A practical strategy to access chiral α-aryloxy carboxylic acids through ion-pairing directed asymmetric hydrogenation
Source: Royal Society of Chemistry journal article supplement (doi:10.1039/d0qo01205j), 2020-01-01
Supplement: d0qo01205j1.pdf [file d0qo01205j1.pdf]

Supporting information

**A practical strategy to access chiral  $\alpha$ -aryloxy carboxylic acids through  
ion-pairing directed asymmetric hydrogenation**

Lin Yao,<sup>†a</sup> Haixia Ma,<sup>†a</sup> Zhuang Nie,<sup>b</sup> Huifang Nie,<sup>a</sup> Dongxu Zhang,<sup>a</sup> Zhao Wei,<sup>a</sup> Zhanhong Shen,<sup>a</sup>  
Weiping Chen,<sup>a</sup> Ru Jiang,<sup>\*a</sup> Shengyong Zhang<sup>\*a</sup>

Contents

|                                                                                                             |    |
|-------------------------------------------------------------------------------------------------------------|----|
| 1. General information.....                                                                                 | 2  |
| 2. Preparation and characterization of $\alpha$ -aryloxy-substituted $\alpha,\beta$ -unsaturated acids..... | 2  |
| 3. Asymmetric hydrogenation of $\alpha$ -aryloxy-substituted $\alpha,\beta$ -unsaturated acids.....         | 5  |
| 3.1 General procedure of asymmetric hydrogenation.....                                                      | 5  |
| 3.2 Ligands screened in the asymmetric hydrogenation.....                                                   | 6  |
| 4. Analytical data of the hydrogenation products.....                                                       | 6  |
| 5. Reference.....                                                                                           | 10 |
| 6. NMR spectra.....                                                                                         | 11 |
| 7. HPLC spectra.....                                                                                        | 58 |

## 1. General information

Unless otherwise noted, all experiments dealing with air- or moisture-sensitive compounds were carried out in the argon-filled glove box or using standard Schlenk techniques and oil bath were utilized as the heat source. All commercially available chemicals including solvents were used without further purification.  $^1\text{H}$  NMR,  $^{13}\text{C}$  NMR were recorded on a Bruker ADVANCE III (400 MHz) spectrometer with  $\text{CDCl}_3$ ,  $\text{CD}_3\text{OD}$ ,  $\text{DMSO-d}$  as the solvent and tetramethylsilane (TMS) as the internal standard. Enantiomeric excesses were determined by Daicel chiral column on an Agilent 1260 Series HPLC instrument. Optical rotations were measured on a PERKIN ELMER polarimeter 343 instrument. High-Resolution Mass Spectroscopy (HRMS) was carried out on a VARIA FT-ICR MS. The absolute configuration of the hydrogenation products was determined by comparison of analytical data with the literature.<sup>1,2</sup>

## 2. Preparation and characterization of $\alpha$ -aryloxy-substituted $\alpha,\beta$ -unsaturated acids

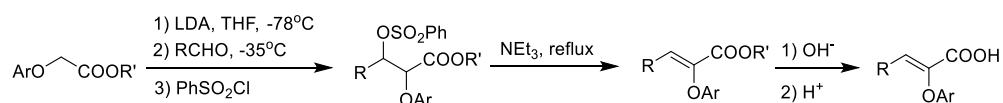

All the  $\alpha$ -aryloxy substituted  $\alpha,\beta$ -unsaturated acids were prepared following the above procedure according to literature.<sup>1</sup>

Characterization data of all the unsaturated acids was showed as followings:

### (Z)-2-phenoxy-3-phenylacrylic acid (1a)

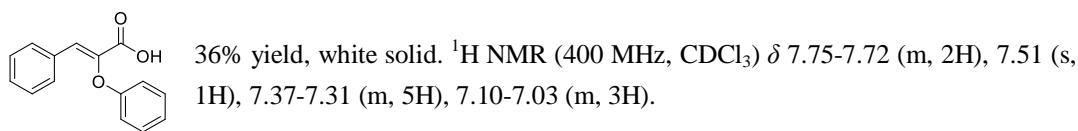

### (Z)-3-(4-methoxyphenyl)-2-phenoxyacrylic acid (1b)

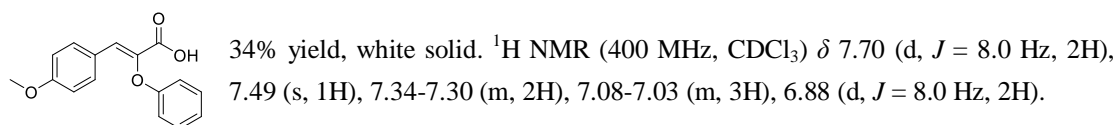

### (Z)-3-(3-methoxyphenyl)-2-phenoxyacrylic acid (1c)

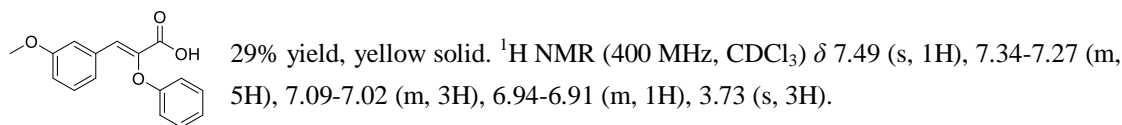

### (Z)-2-phenoxy-3-(p-tolyl)acrylic acid (1d)

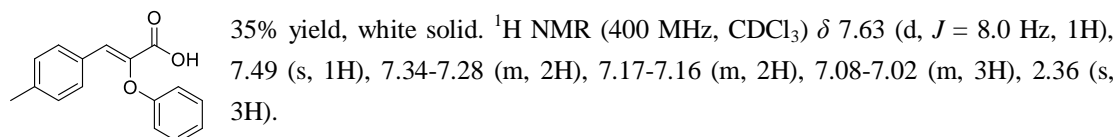

### (Z)-3-(4-(tert-butyl)phenyl)-2-phenoxyacrylic acid (1e)

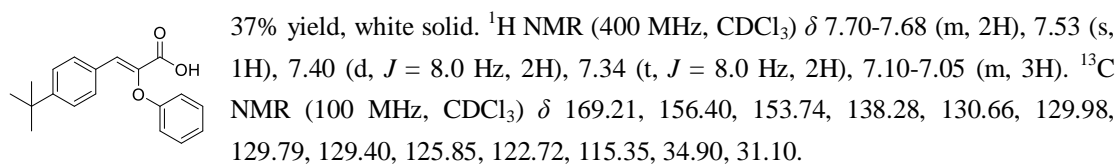

**(Z)-3-(naphthalen-1-yl)-2-phenoxyacrylic acid (1f)**

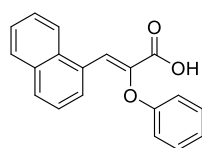

43% yield, white solid.  $^1\text{H NMR}$  (400 MHz,  $\text{CDCl}_3$ )  $\delta$  8.33 (s, 1H), 8.22 (d,  $J = 8.0$  Hz, 1H), 8.11 (d,  $J = 4.0$  Hz, 1H), 7.88 (t,  $J = 8.0$  Hz, 2H), 7.65-7.62 (m, 1H), 7.58-7.55 (m, 1H), 7.48-7.42 (m, 1H), 7.32-7.29 (m, 2H), 7.06-7.04 (m, 3H).

**(Z)-3-(naphthalen-2-yl)-2-phenoxyacrylic acid (1g)**

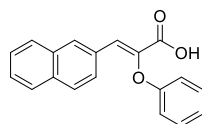

46% yield, white solid.  $^1\text{H NMR}$  (400 MHz,  $\text{CDCl}_3$ )  $\delta$  8.18 (s, 1H), 7.90-7.78 (m, 4H), 7.69 (s, 1H), 7.54-7.48 (m, 2H), 7.36-7.29 (m, 3H), 7.10 (d,  $J = 8.0$  Hz, 2H).

**(Z)-3-(3-fluorophenyl)-2-phenoxyacrylic acid (1h)**

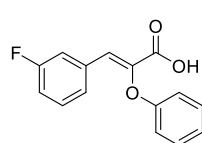

42% yield, white solid.  $^1\text{H NMR}$  (400 MHz,  $\text{CDCl}_3$ )  $\delta$  7.52-7.35 (m, 3H), 7.36-7.32 (m, 3H), 7.11-7.07 (m, 2H), 7.04-7.02 (m, 2H).  $^{13}\text{C NMR}$  (100 MHz,  $\text{CDCl}_3$ )  $\delta$  168.30, 163.96, 161.52, 156.04, 139.89, 134.18, 134.09, 130.25, 130.17, 129.86, 128.25, 126.59, 123.10, 117.20, 117.06, 116.99, 116.84, 115.44.  $^{19}\text{F NMR}$  (100 MHz,  $\text{CDCl}_3$ )  $\delta$  -112.19.

**(Z)-3-(4-chlorophenyl)-2-phenoxyacrylic acid (1i)**

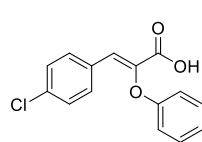

45% yield, white solid.  $^1\text{H NMR}$  (400 MHz,  $\text{CDCl}_3$ )  $\delta$  7.67 (d,  $J = 8.0$  Hz, 2H), 7.45 (s, 1H), 7.34-7.32 (m, 4H), 7.09 (t,  $J = 8.0$  Hz, 1H), 7.03-7.01 (m, 2H).  $^{13}\text{C NMR}$  (100 MHz,  $\text{CDCl}_3$ )  $\delta$  168.18, 154.86, 138.65, 131.90, 130.71, 130.40, 130.16, 129.75, 128.90, 127.90, 116.77.

**(Z)-2-phenoxy-3-(4-(trifluoromethyl)phenyl)acrylic acid (1j)**

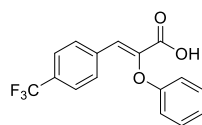

47% yield, white solid.  $^1\text{H NMR}$  (400 MHz,  $\text{CDCl}_3$ )  $\delta$  7.85 (d,  $J = 8.0$  Hz, 2H), 7.62 (d,  $J = 8.0$  Hz, 2H), 7.52 (s, 1H), 7.35 (t,  $J = 8.0$  Hz, 2H), 7.11 (t,  $J = 8.0$  Hz, 1H), 7.03 (d,  $J = 8.0$  Hz, 2H).

**(Z)-3-(2-bromophenyl)-2-phenoxyacrylic acid (1k)**

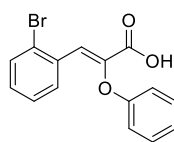

43% yield, white solid.  $^1\text{H NMR}$  (400 MHz,  $\text{CDCl}_3$ )  $\delta$  7.94-7.93 (m, 1H), 7.85 (s, 1H), 7.62 (d,  $J = 8.0$  Hz, 1H), 7.28-7.15 (m, 4H), 7.05-6.97 (m, 3H).  $^{13}\text{C NMR}$  (100 MHz,  $\text{CDCl}_3$ )  $\delta$  168.29, 156.34, 140.80, 133.01, 131.09, 130.77, 129.77, 127.59, 126.95, 122.86, 115.48.

**(Z)-3-(3-bromophenyl)-2-phenoxyacrylic acid (1l)**

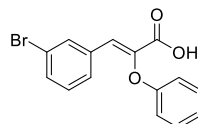

39% yield, white solid.  $^1\text{H NMR}$  (400 MHz,  $\text{CDCl}_3$ )  $\delta$  7.86 (s, 1H), 7.69 (d,  $J = 8.0$  Hz, 1H), 7.49 (d,  $J = 8.0$  Hz, 1H), 7.40 (s, 1H), 7.34 (t,  $J = 8.0$  Hz, 2H), 7.25-7.21 (m, 1H), 7.11-7.08 (m, 1H), 7.02 (d,  $J = 8.0$  Hz, 1H).  $^{13}\text{C NMR}$  (100 MHz,  $\text{CDCl}_3$ )  $\delta$  168.13, 156.05, 140.05, 133.38, 132.91, 130.29, 129.86, 128.94, 127.83, 123.11, 115.44, 114.65.

**(Z)-3-(2-nitrophenyl)-2-phenoxyacrylic acid (1m)**

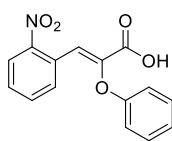

40% yield, light brown solid.  $^1\text{H NMR}$  (400 MHz,  $\text{CDCl}_3$ )  $\delta$  8.07 (d,  $J = 8.0$  Hz, 1H), 7.88-7.85 (m, 2H), 7.59 (t,  $J = 8.0$  Hz, 1H), 7.49 (t,  $J = 8.0$  Hz, 1H), 7.32-7.28 (m, 2H), 7.07-7.04 (m, 1H), 6.99-6.97 (m, 2H).  $^{13}\text{C NMR}$  (100 MHz,  $\text{CDCl}_3$ )  $\delta$  167.46, 156.47, 148.10, 141.06, 133.26, 131.46, 129.87, 129.81, 124.77,

124.71, 123.08, 115.45.

**(Z)-3-(3-nitrophenyl)-2-phenoxyacrylic acid (1n)**

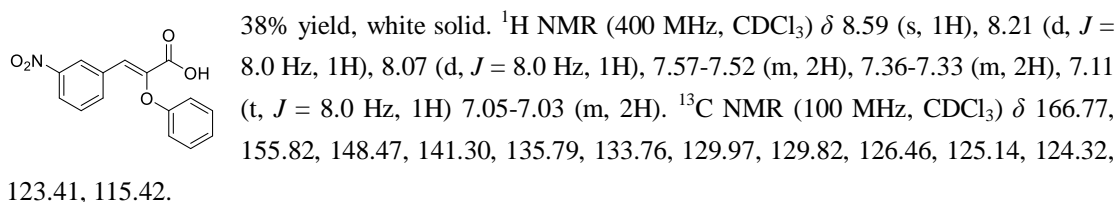

**(Z)-3-(4-nitrophenyl)-2-phenoxyacrylic acid (1o)**

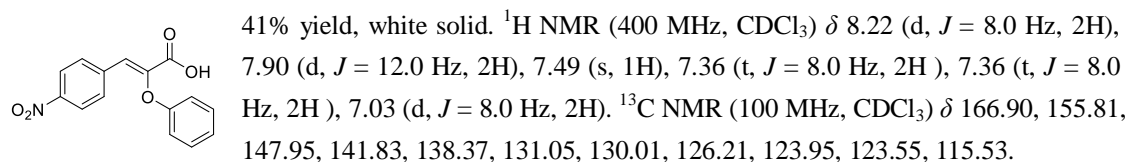

**(Z)-3-(2-hydroxyphenyl)-2-phenoxyacrylic acid (1p)**

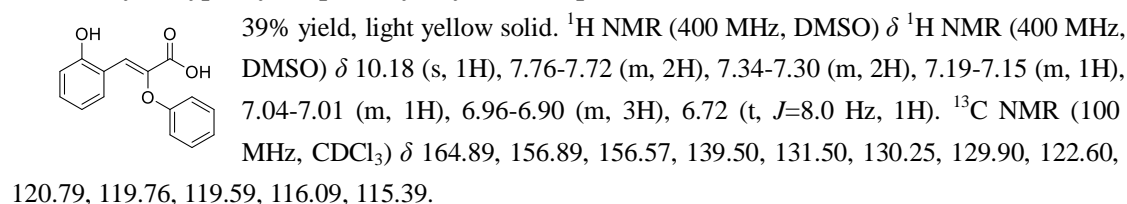

**(Z)-3-(furan-2-yl)-2-phenoxyacrylic acid (1q)**

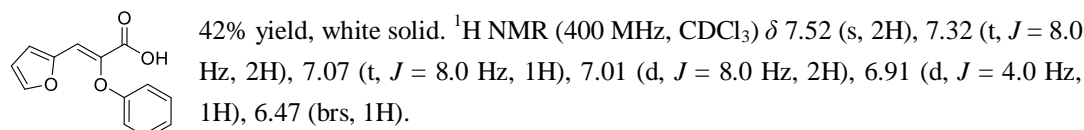

**(Z)-2-phenoxy-3-(thiophen-2-yl)acrylic acid (1r)**

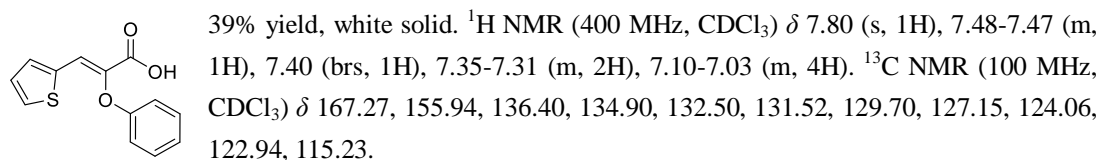

**(Z)-3-phenyl-2-(o-tolyloxy)acrylic acid (1s)**

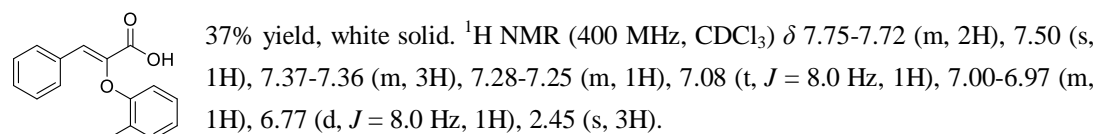

**(Z)-3-phenyl-2-(m-tolyloxy)acrylic acid (1t)**

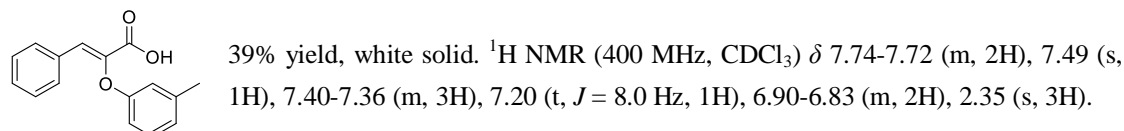

**(Z)-3-phenyl-2-(p-tolyloxy)acrylic acid (1u)**

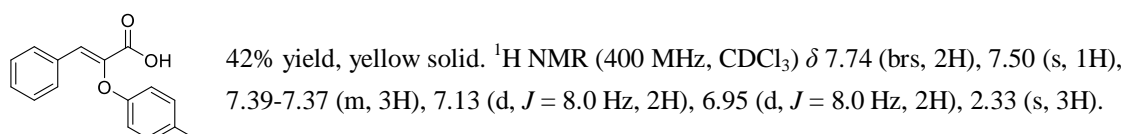

**(Z)-2-(4-chlorophenoxy)-3-phenylacrylic acid (1v)**

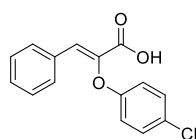

36% yield, white solid.  $^1\text{H NMR}$  (400 MHz,  $\text{CDCl}_3$ )  $\delta$  7.71 (brs, 2H), 7.52 (s, 1H), 7.38-7.29 (m, 5H), 6.98-6.97 (m, 2H).

**(Z)-2-(4-fluorophenoxy)-3-phenylacrylic acid (1w)**

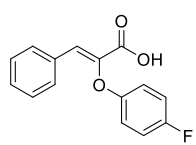

37% yield, white solid.  $^1\text{H NMR}$  (400 MHz,  $\text{CDCl}_3$ )  $\delta$  7.73 (brs, 2H), 7.50 (s, 1H), 7.38 (brs, 3H), 7.00-6.99 (m, 4H).  $^{13}\text{C NMR}$  (100 MHz,  $\text{CDCl}_3$ )  $\delta$  168.52, 159.69, 157.30, 152.21, 139.09, 132.04, 130.70, 130.32, 129.92, 128.88, 116.65, 116.57, 116.38, 116.15.  $^{19}\text{F NMR}$  (100 MHz,  $\text{CDCl}_3$ )  $\delta$  -121.22.

**(Z)-2-phenoxyhex-2-enoic acid (1x)**

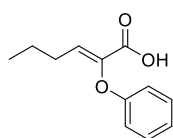

29% yield, white needle crystals.  $^1\text{H NMR}$  (400 MHz,  $\text{CDCl}_3$ )  $\delta$  7.32-7.28 (m, 2H), 7.05-7.02 (m, 1H), 6.95-6.93 (m, 2H), 6.80 (t,  $J = 8.0$  Hz, 1H), 2.23 (q,  $J = 8.0$  Hz, 2H), 1.49 (q,  $J = 8.0$  Hz, 2H), 0.94 (t,  $J = 8.0$  Hz, 3H).  $^{13}\text{C NMR}$  (100 MHz,  $\text{CDCl}_3$ )  $\delta$  167.86, 157.20, 140.25, 135.14, 129.69, 129.62, 122.24, 114.88, 28.03, 21.55,

13.88.

**(Z)-5-methyl-2-phenoxyhex-2-enoic acid (1y)**

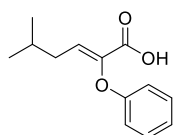

31% yield, yellow viscous oil.  $^1\text{H NMR}$  (400 MHz,  $\text{CDCl}_3$ )  $\delta$  7.33-7.28 (m, 2H), 7.04 (t,  $J = 8.0$  Hz, 1H), 6.93 (d,  $J = 8.0$  Hz, 2H), 6.81 (t,  $J = 8.0$  Hz, 1H), 2.15 (t,  $J = 8.0$  Hz, 2H), 1.82-1.71 (m, 1H), 0.94 (d,  $J = 8.0$  Hz, 6H).  $^{13}\text{C NMR}$  (100 MHz,  $\text{CDCl}_3$ )  $\delta$  168.17, 157.17, 140.62, 134.32, 129.61, 122.25, 114.92, 34.94, 28.01,

22.48.

**(Z)-3-([1,1'-biphenyl]-4-yl)-2-([1,1'-biphenyl]-4-yloxy)acrylic acid (1z)**

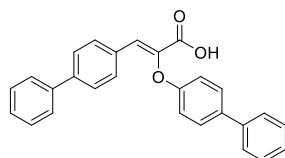

53% yield, white solid.  $^1\text{H NMR}$  (400 MHz,  $\text{CDCl}_3$ )  $\delta$  7.84 (d,  $J = 8.0$  Hz, 2H), 7.63-7.55 (m, 9H), 7.45 (q,  $J = 8.0$  Hz, 4H), 7.40-7.34 (m, 2H), 7.16-7.13 (m, 2H).  $^{13}\text{C NMR}$  (100 MHz,  $\text{CDCl}_3$ )  $\delta$  164.60, 156.38, 141.57, 140.68, 140.05, 139.60, 135.04, 131.95, 131.16, 129.47, 129.38, 128.71, 128.39, 127.48, 127.13, 126.85, 126.45, 116.03.

**3. Asymmetric hydrogenation of  $\alpha$ -aryloxy-substituted  $\alpha,\beta$ -unsaturated acids**

**3.1 General procedure of asymmetric hydrogenation**

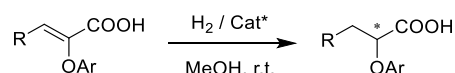

A solution of ( $R_C$ ,  $S_{FC}$ ,  $S_P$ )-Chenphos (1.64mg, 0.0022 mmol) and  $\text{Rh}(\text{nbd})_2\text{BF}_4$  (0.46 mg, 0.002 mmol) in MeOH (1 mL) was stirred under nitrogen atmosphere. After 30 min, the clear yellow solution was transferred into a hydrogenation tube equipped with a stir bar, and the  $\alpha,\beta$ -unsaturated carboxylic acids was added. The hydrogenation tube was then put into an autoclave. The air in the autoclave was replaced with hydrogen for three times. The autoclave was then charged with hydrogen to 20 atm, and the reaction mixture was stirred at room temperature for 20 h. After releasing the hydrogen, the reaction mixture was concentrated on a rotary evaporator. The conversion of substrate was determined by  $^1\text{H NMR}$  analysis. The crude product was purified by flash chromatography on silica gel column to give the pure product. The product was reacted with aniline (1.1 eq) in the presence of DMAP and DCC in THF for 30 min to afford the corresponding amide. After a flash chromatography on neutral  $\text{Al}_2\text{O}_3$  column, the desired amide was obtained and the *ee* values of the products were determined by chiral HPLC.

### 3.2 Ligands screened in the asymmetric hydrogenation

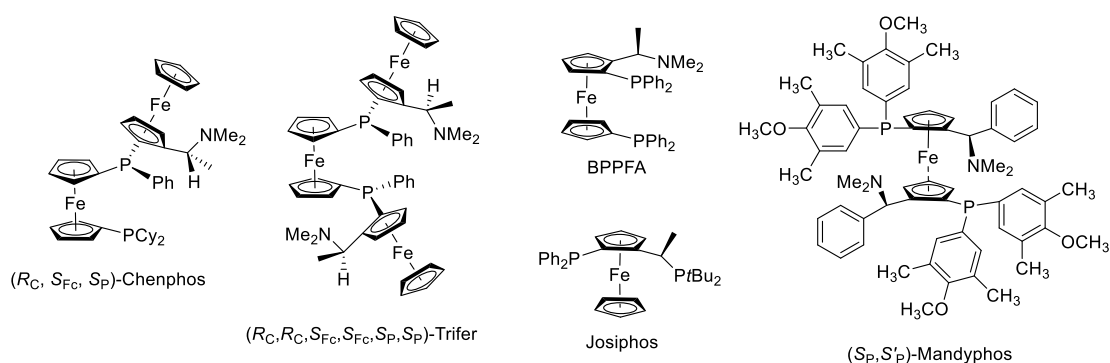

## 4. Analytical Data of the Hydrogenation Products

### (S)-2-phenoxy-3-phenylpropionic acid (2a)

White solid, 97% yield, 98% *ee*. HPLC condition: Chiralcel OD-H column (25 cm × 0.46 cm ID), hexane/2-propanol=95:5, flow rate=1.0 mL/min, 254 nm UV detector, *t<sub>R</sub>*=16.35 min for major isomer, and *t<sub>R</sub>*=20.85 min for minor isomer; <sup>1</sup>H NMR (400 MHz, CDCl<sub>3</sub>) δ 7.33-7.26 (m, 7H), 6.98 (t, *J* = 16.0 Hz, 1H), 6.86 (d, *J* = 4.0 Hz, 2H), 4.84 (brs, 1H), 3.28 (s, 2H). <sup>13</sup>C NMR (100 MHz, CDCl<sub>3</sub>) δ 157.56, 136.32, 129.63, 129.55, 128.51, 127.04, 121.99, 115.41, 38.87.

### (S)-3-(4-methoxyphenyl)-2-phenoxypropionic acid (2b)

White solid, 98% yield, 98% *ee*. HPLC condition: Chiralcel OD-H column (25 cm × 0.46 cm ID), hexane/2-propanol=92:8, flow rate=0.8 mL/min, 254 nm UV detector, *t<sub>R</sub>*=19.11 min for major isomer, and *t<sub>R</sub>*=21.80 min for minor isomer; <sup>1</sup>H NMR (400 MHz, CDCl<sub>3</sub>) δ 7.28-7.25 (m, 5H), 7.01-6.97 (m, 1H), 6.87 (t, *J* = 16 Hz, 3H), 4.82 (brs, 1H), 3.25 (d, *J* = 4 Hz, 2H). <sup>13</sup>C NMR (100 MHz, CDCl<sub>3</sub>) δ 158.59, 157.60, 130.58, 129.64, 128.35, 121.94, 120.51, 115.41, 113.93, 55.25, 38.01.

### (S)-3-(3-methoxyphenyl)-2-phenoxypropionic acid (2c)

White solid, 97% yield, 95% *ee*. HPLC condition: Chiralcel OD-H column (25 cm × 0.46 cm ID), hexane/2-propanol=92:8, flow rate=0.8 mL/min, 254 nm UV detector, *t<sub>R</sub>*=17.26 min for major isomer, and *t<sub>R</sub>*=21.54 min for minor isomer; <sup>1</sup>H NMR (400 MHz, CDCl<sub>3</sub>) δ 7.30-7.23 (m, 2H), 7.02-6.99 (m, 1H), 6.95-6.88 (m, 4H), 6.84-6.82 (m, 2H), 4.88 (t, *J* = 6.0 Hz, 1H), 3.81 (s, 3H), 3.29 (d, *J* = 8.0 Hz, 2H). <sup>13</sup>C NMR (100 MHz, CDCl<sub>3</sub>) δ 176.31, 159.59, 157.72, 137.75, 129.65, 129.50, 122.04, 121.86, 115.38, 115.21, 112.60, 55.20, 38.91.

### (S)-2-phenoxy-3-p-tolylpropionic acid (2d)

White solid, 97% yield, 98% *ee*. HPLC condition: Chiralcel OD-H column (25 cm × 0.46 cm ID), hexane/2-propanol=92:8, flow rate=0.8 mL/min, 254 nm UV detector, *t<sub>R</sub>*=12.75 min for major isomer, and *t<sub>R</sub>*=14.18 min for minor isomer; <sup>1</sup>H NMR (400 MHz, CDCl<sub>3</sub>) δ 7.30-7.22 (m, 4H), 7.15-7.13 (m, 2H), 7.01 (d, *J* = 6.0 Hz, 1H), 6.88 (d, *J* = 8.0 Hz, 2H), 4.85 (t, *J* = 8.0 Hz, 1H), 3.28-3.27 (m, 2H), 2.35 (s, 3H). <sup>13</sup>C NMR (100 MHz, CDCl<sub>3</sub>) δ 176.33, 157.46, 136.65, 132.95, 129.64, 129.38, 129.21, 122.03, 115.35, 38.42, 21.22.

### (S)-3-(4-(*tert*-butyl)phenyl)-2-phenoxypropionic acid (2e)

White solid, 96% yield, 93% *ee*. HPLC condition: Chiralcel AS-H column (25 cm × 0.46 cm ID), hexane/2-propanol=92:8, flow rate=0.8 mL/min, 254 nm UV detector, *t<sub>R</sub>*=7.47 min for major isomer, and *t<sub>R</sub>*=9.74 min for minor isomer; <sup>1</sup>H NMR (400 MHz, CDCl<sub>3</sub>) δ 7.37-7.29 (m, 6H), 7.01 (t, *J* = 6.0 Hz, 1H), 6.91-6.89 (m, 2H), 4.87 (brs,

1H), 3.30-3.29 (m, 2H), 1.34 (s, 9H). <sup>13</sup>C NMR (100 MHz, CDCl<sub>3</sub>) δ 176.04, 157.57, 149.87, 133.20, 129.62, 129.17, 125.42, 121.95, 115.37, 38.38, 34.46, 31.37.

**(S)-3-(naphthalen-1-yl)-2-phenoxypropionic acid (2f)**

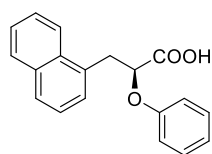

White solid, 97% yield, 95% *ee*. HPLC condition: Chiralcel OD-H column (25 cm × 0.46 cm ID), hexane/2-propanol=85:15, flow rate=1.0 mL/min, 254 nm UV detector, *t<sub>R</sub>*=9.58 min for major isomer, and *t<sub>R</sub>*=13.60 min for minor isomer; <sup>1</sup>H NMR (400 MHz, CDCl<sub>3</sub>) δ 8.20 (d, *J*=8.0 Hz, 1H), 7.90 (d, *J*=8.0 Hz, 1H), 7.80 (d, *J*=8.0 Hz, 1H), 7.61-7.52 (m, 3H), 7.45-7.42 (m, 1H), 7.23-7.19 (m, 2H), 6.96-6.93 (m, 1H), 6.80-6.78 (m, 2H), 5.01-4.99 (m, 1H), 3.89-3.86 (m, 1H), 3.72-3.67 (m, 1H). <sup>13</sup>C NMR (100 MHz, CDCl<sub>3</sub>) δ 176.22, 157.60, 133.92, 132.32, 131.97, 129.54, 128.95, 128.12, 127.97, 126.30, 125.67, 125.43, 123.51, 121.93, 115.28, 36.27.

**(S)-3-(naphthalen-2-yl)-2-phenoxypropionic acid (2g)**

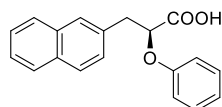

White solid, 98% yield, 98% *ee*. HPLC condition: Chiralcel OD-H column (25 cm × 0.46 cm ID), hexane/2-propanol=85:15, flow rate=1.0 mL/min, 254 nm UV detector, *t<sub>R</sub>*=11.69 min for major isomer, and *t<sub>R</sub>*=14.75 min for minor isomer; <sup>1</sup>H NMR (400 MHz, CDCl<sub>3</sub>) δ 7.83-7.81 (m, 4H), 7.49 (brs, 3H), 7.27-7.25 (m, 2H), 6.99-6.97 (m, 1H), 6.91-6.89 (m, 2H), 4.97 (brs, 1H), 3.48 (brs, 2H). <sup>13</sup>C NMR (100 MHz, CDCl<sub>3</sub>) δ 176.05, 157.52, 133.76, 133.47, 132.52, 129.64, 128.27, 128.12, 127.71, 127.66, 126.09, 125.74, 122.06, 115.42, 39.03.

**(S)-3-(3-fluorophenyl)-2-phenoxypropionic acid (2h)**

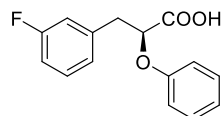

White solid, 98% yield, 97% *ee*. HPLC condition: Chiralcel OD-H column (25 cm × 0.46 cm ID), hexane/2-propanol=90:10, flow rate=1.0 mL/min, 254 nm UV detector, *t<sub>R</sub>*=9.83 min for major isomer, and *t<sub>R</sub>*=12.84 min for minor isomer; <sup>1</sup>H NMR (400 MHz, CDCl<sub>3</sub>) δ 7.28 (brs, 4H), 7.12-7.06 (m, 2H), 7.02-6.95 (m, 2H), 6.87 (d, *J* = 8.0 Hz, 2H), 4.85 (brs, 1H), 3.30-3.29 (m, 2H). <sup>13</sup>C NMR (100 MHz, CDCl<sub>3</sub>) δ 163.99, 161.54, 157.43, 138.80, 129.98, 129.90, 129.68, 125.21, 122.10, 116.62, 116.40, 115.33, 114.10, 113.90, 38.43. <sup>19</sup>F NMR (100 MHz, CDCl<sub>3</sub>) δ -113.24.

**(S)-3-(4-chlorophenyl)-2-phenoxypropionic acid (2i)**

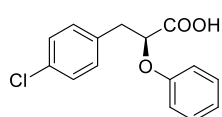

White solid, 97% yield, 95% *ee*. HPLC condition: Chiralcel OD-H column (25 cm × 0.46 cm ID), hexane/2-propanol=92:8, flow rate=0.8 mL/min, 254 nm UV detector, *t<sub>R</sub>*=15.99 min for major isomer (*S*), and *t<sub>R</sub>*=20.45 min for minor isomer (*R*); <sup>1</sup>H NMR (400 MHz, CDCl<sub>3</sub>) δ 7.31-7.29 (m, 6H), 7.02 (t, *J* = 6.0 Hz, 1H), 6.87 (d, *J* = 8.0 Hz, 2H), 4.84 (t, *J* = 6.0 Hz, 1H), 3.28-3.27 (m, 2H). <sup>13</sup>C NMR (100 MHz, CDCl<sub>3</sub>) δ 176.03, 157.37, 134.63, 133.00, 130.91, 129.71, 128.66, 122.17, 115.30, 38.13.

**(S)-2-phenoxy-3-(4-(trifluoromethyl)phenyl)propanoic acid (2j)**

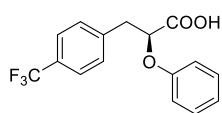

White solid, 98% yield, 96% *ee*. HPLC condition: Chiralcel OD-H column (25 cm × 0.46 cm ID), hexane/2-propanol=92:8, flow rate=0.8 mL/min, 254 nm UV detector, *t<sub>R</sub>*=16.45 min for major isomer, and *t<sub>R</sub>*=24.54 min for minor isomer; <sup>1</sup>H NMR (400 MHz, CDCl<sub>3</sub>) δ 7.60-7.58 (m, 2H), 7.48-7.46 (m, 2H), 7.31-7.27 (m, 2H), 7.02 (t, *J* = 16.0 Hz, 1H), 6.87 (d, *J* = 8.0 Hz, 2H), 4.89 (t, *J*=12.0 Hz, 1H), 3.37-3.36 (m, 2H). <sup>13</sup>C NMR (100 MHz, CDCl<sub>3</sub>) δ 175.96, 157.25, 140.21, 129.90, 129.73, 125.45, 125.42, 122.27, 115.23, 38.50.

**3-(2-bromophenyl)-2-phenoxypropionic acid (2k)**

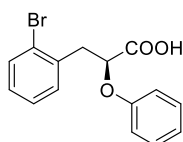

White solid, 96% yield, 95% *ee*. HPLC condition: Chiralcel OD-H column (25 cm × 0.46 cm ID), hexane/2-propanol=92:8, flow rate=0.8 mL/min, 254 nm UV detector, *t<sub>R</sub>*=13.76 min for major isomer, and *t<sub>R</sub>*=21.25 min for minor isomer; <sup>1</sup>H

NMR (400 MHz, CDCl<sub>3</sub>)  $\delta$  7.57-7.56 (m, 1H), 7.38-7.37 (m, 1H), 7.24-7.23 (m, 2H), 7.13-7.12 (m, 1H), 6.97-6.95 (m, 1H), 6.84 (brs, 2H), 4.95 (brs, 1H), 3.53-3.50 (m, 1H), 3.33 (brs, 1H). <sup>13</sup>C NMR (100 MHz, CDCl<sub>3</sub>)  $\delta$  176.10, 157.64, 135.78, 132.85, 132.22, 129.56, 128.77, 127.41, 124.71, 121.92, 115.39, 39.28.

**(S)-3-(3-bromophenyl)-2-phenoxypropanoic acid (2l)**

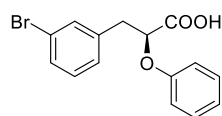

White solid, 97% yield, 96% *ee*. HPLC condition: Chiralcel OD-H column (25 cm  $\times$  0.46 cm ID), hexane/2-propanol=92:8, flow rate=0.8 mL/min, 254 nm UV detector,  $t_R$ =15.65 min for major isomer, and  $t_R$ =19.96 min for minor isomer; <sup>1</sup>H NMR (400 MHz, CDCl<sub>3</sub>)  $\delta$  7.51 (s, 1H), 7.40-7.39 (m, 1H), 7.19-7.18 (m, 4H), 6.99 (brs, 1H), 6.87 (s, 2H), 4.83 (s, 1H), 3.25 (s, 2H). <sup>13</sup>C NMR (100 MHz, CDCl<sub>3</sub>)  $\delta$  175.71, 157.41, 138.59, 132.62, 130.20, 130.02, 129.66, 122.41, 122.12, 115.37, 38.43.

**(S)-3-(2-nitrophenyl)-2-phenoxypropanoic acid (2m)**

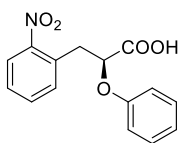

White solid, 98% yield, 92% *ee*. HPLC condition: Chiralcel OD-H column (25 cm  $\times$  0.46 cm ID), hexane/2-propanol=85:15, flow rate=1.0 mL/min, 254 nm UV detector,  $t_R$ =9.26 min for major isomer, and  $t_R$ =11.41 min for minor isomer; <sup>1</sup>H NMR (400 MHz, CDCl<sub>3</sub>)  $\delta$  7.97-7.95 (m, 1H), 7.54 (brs, 2H), 7.44-7.42 (m, 1H), 7.26-7.22 (m, 2H), 6.98-6.95 (m, 1H), 6.84-6.82 (m, 2H), 5.02-5.01 (m, 1H), 3.74-3.71 (m, 1H), 3.60-3.54 (m, 1H). <sup>13</sup>C NMR (100 MHz, CDCl<sub>3</sub>)  $\delta$  175.14, 157.39, 149.85, 133.56, 132.99, 131.13, 129.60, 128.35, 124.90, 122.03, 115.16, 35.91.

**(S)-3-(3-nitrophenyl)-2-phenoxypropanoic acid (2n)**

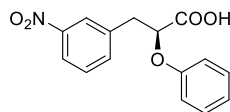

White solid, 98% yield, 97% *ee*. HPLC condition: Chiralcel OD-H column (25 cm  $\times$  0.46 cm ID), hexane/2-propanol=85:15, flow rate=1.0 mL/min, 254 nm UV detector,  $t_R$ =18.44 min for major isomer, and  $t_R$ =24.93 min for minor isomer; <sup>1</sup>H NMR (400 MHz, CDCl<sub>3</sub>)  $\delta$  8.25 (brs, 1H), 8.13-8.11 (m, 1H), 7.70-7.68 (m, 1H), 7.51-7.47 (m, 1H), 7.28-7.25 (m, 2H), 7.01-6.98 (m, 1H), 6.87-6.85 (m, 2H), 4.89 (brs, 1H), 3.41 (brs, 2H). <sup>13</sup>C NMR (100 MHz, CDCl<sub>3</sub>)  $\delta$  175.48, 157.18, 148.24, 138.21, 135.93, 129.74, 129.43, 124.57, 122.29, 115.22, 38.25.

**(S)-3-(4-nitrophenyl)-2-phenoxypropanoic acid (2o)**

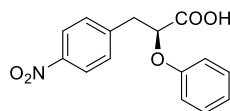

White solid, 98% yield, 96% *ee*. HPLC condition: Chiralcel OD-H column (25 cm  $\times$  0.46 cm ID), hexane/2-propanol=85:15, flow rate=1.0 mL/min, 254 nm UV detector,  $t_R$ =25.36 min for major isomer, and  $t_R$ =33.68 min for minor isomer; <sup>1</sup>H NMR (400 MHz, CDCl<sub>3</sub>)  $\delta$  8.16 (d,  $J$  = 8.0 Hz, 2H), 7.49 (d,  $J$  = 8.0 Hz, 2H), 7.29-7.25 (m, 2H), 7.00 (t,  $J$  = 8.0 Hz, 1H), 6.84 (d,  $J$  = 8.0 Hz, 2H), 4.89 (brs, 1H), 3.38 (brs, 2H). <sup>13</sup>C NMR (100 MHz, CDCl<sub>3</sub>)  $\delta$  175.17, 157.13, 147.16, 143.84, 130.48, 129.76, 123.66, 122.36, 115.19, 38.42.

**(S)-3-(2-hydroxyphenyl)-2-phenoxypropanoic acid (2p)**

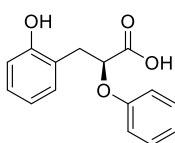

White solid, 97% yield, 95% *ee*. HPLC condition: Chiralcel AS-H column (25 cm  $\times$  0.46 cm ID), hexane/2-propanol=90:10, flow rate=1.0 mL/min, 254 nm UV detector,  $t_R$ =22.27 min for major isomer, and  $t_R$ =25.75 min for minor isomer; <sup>1</sup>H NMR (400 MHz, DMSO)  $\delta$  7.25 (t,  $J$ =8.0 Hz, 2H), 7.15 (d,  $J$ =8.0 Hz, 1H), 7.06-7.03 (m, 1H), 6.93-6.90 (m, 1H), 6.81 (d,  $J$ =8.0 Hz), 6.72 (t,  $J$ =8.0 Hz), 4.89 (t,  $J$ =8.0 Hz, 1H), 3.21-3.17 (m, 1H), 3.08-3.02 (m, 1H). <sup>13</sup>C NMR (100 MHz, DMSO)  $\delta$  172.83, 158.21, 155.86, 131.64, 129.97, 128.24, 123.23, 121.47, 119.23, 115.32, 115.20, 75.75, 33.78.



**(S)-3-(furan-2-yl)-2-phenoxypropanoic acid (2q)**

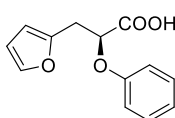

Brown solid, 99% yield, 97% *ee*. HPLC condition: Chiralcel AD-H column (25 cm × 0.46 cm ID), hexane/2-propanol=90:10, flow rate=1.0 mL/min, 254 nm UV detector,  $t_R$ =20.44 min for minor isomer and  $t_R$ =22.86 min for major isomer;  $^1\text{H}$  NMR (400 MHz,  $\text{CDCl}_3$ )  $\delta$  7.35-7.30 (m, 3H), 7.04-7.01 (m, 1H), 6.91-6.85 (m, 2H), 6.32 (s, 1H), 6.23 (s, 1H), 4.98 (brs, 1H), 3.37-3.35 (d,  $J$  = 8.0 Hz, 2H).  $^{13}\text{C}$  NMR (100 MHz,  $\text{CDCl}_3$ )  $\delta$  175.70, 157.43, 149.81, 141.92, 129.66, 122.22, 115.59, 110.51, 108.04, 31.57.

**(S)-2-phenoxy-3-(thiophen-2-yl)propanoic acid (2r)**

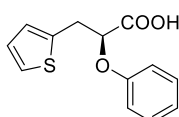

White solid, 99% yield, >99% *ee*. HPLC condition: Chiralcel OD-H column (25 cm × 0.46 cm ID), hexane/2-propanol=92:8, flow rate=0.8 mL/min, 254 nm UV detector,  $t_R$ =15.25 min for major isomer;  $^1\text{H}$  NMR (400 MHz,  $\text{CDCl}_3$ )  $\delta$  8.11 (brs, 1H), 7.31-7.29 (m, 2H), 7.21 (s, 1H), 7.03-6.95 (m, 5H), 4.86 (brs, 1H), 3.53 (brs, 2H).  $^{13}\text{C}$  NMR (100 MHz,  $\text{CDCl}_3$ )  $\delta$  175.85, 157.39, 137.68, 129.66, 126.83, 126.78, 124.99, 122.18, 115.51, 33.11.

**(S)-3-phenyl-2-(o-tolyloxy)propanoic acid (2s)**

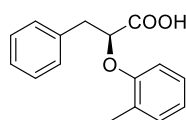

Colorless oil and solidified by standing. 95% yield, 98% *ee*. HPLC condition: Chiralcel OD-H column (25 cm × 0.46 cm ID), hexane/2-propanol=92:8, flow rate=0.8 mL/min, 254 nm UV detector,  $t_R$ =11.34 min for major isomer, and  $t_R$ =12.89 min for minor isomer;  $^1\text{H}$  NMR (400 MHz,  $\text{CDCl}_3$ )  $\delta$  7.35-7.29 (m, 5H), 7.16-7.10 (m, 2H), 6.90 (brs, 1H), 6.67-6.66 (m, 1H), 4.87 (brs, 1H), 3.34 (brs, 1H), 2.25 (s, 3H).  $^{13}\text{C}$  NMR (100 MHz,  $\text{CDCl}_3$ )  $\delta$  176.27, 163.51, 136.27, 131.10, 129.60, 128.43, 127.41, 127.03, 126.70, 121.49, 111.49, 39.07, 16.40.

**(S)-3-phenyl-2-(m-tolyloxy)propanoic acid (2t)**

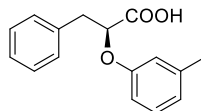

White solid, 96% yield, 97% *ee*. HPLC condition: Chiralcel OD-H column (25 cm × 0.46 cm ID), hexane/2-propanol=92:8, flow rate=0.8 mL/min, 254 nm UV detector,  $t_R$ =10.27 min for major isomer, and  $t_R$ =11.93 min for minor isomer;  $^1\text{H}$  NMR (400 MHz,  $\text{CDCl}_3$ )  $\delta$  7.39-7.28 (m, 5H), 7.16 (t,  $J$  = 8.0 Hz, 1H), 6.82 (d,  $J$  = 8.0 Hz, 1H), 6.72-6.67 (m, 2H), 4.88-4.85 (m, 1H), 3.30 (d,  $J$  = 4.0 Hz, 2H), 2.32 (s, 3H).  $^{13}\text{C}$  NMR (100 MHz,  $\text{CDCl}_3$ )  $\delta$  176.18, 157.53, 139.79, 136.28, 129.53, 129.33, 128.49, 127.03, 122.86, 116.32, 112.01, 38.91, 21.47.

**(S)-3-phenyl-2-(p-tolyloxy)propanoic acid (2u)**

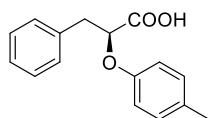

White solid, 97% yield, 97% *ee*. HPLC condition: Chiralcel OD-H column (25 cm × 0.46 cm ID), hexane/2-propanol=92:8, flow rate=0.8 mL/min, 254 nm UV detector,  $t_R$ =11.00 min for major isomer, and  $t_R$ =12.26 min for minor isomer;  $^1\text{H}$  NMR (400 MHz,  $\text{CDCl}_3$ )  $\delta$  7.39-7.29 (m, 5H), 7.08-7.07 (m, 1H), 6.78 (d,  $J$  = 8.0 Hz, 1H), 4.83 (brs, 1H), 3.30 (brs, 2H), 2.30 (s, 3H).  $^{13}\text{C}$  NMR (100 MHz,  $\text{CDCl}_3$ )  $\delta$  176.02, 155.51, 136.37, 131.38, 130.06, 129.52, 128.48, 127.00, 115.39, 38.89, 20.49.

**(S)-2-(4-chlorophenoxy)-3-phenylpropanoic acid (2v)**

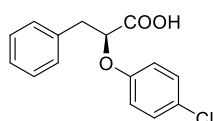

White solid, 93% yield, 95% *ee*. HPLC condition: Chiralcel OD-H column (25 cm × 0.46 cm ID), hexane/2-propanol=92:8, flow rate=0.8 mL/min, 254 nm UV detector,  $t_R$ =16.09 min for major isomer, and  $t_R$ =18.15 min for minor isomer;  $^1\text{H}$  NMR (400 MHz,  $\text{CDCl}_3$ )  $\delta$  7.32-7.21 (m, 7H), 6.79 (s, 2H), 4.80 (brs, 1H), 3.29 (s, 2H).  $^{13}\text{C}$  NMR (100 MHz,  $\text{CDCl}_3$ )  $\delta$  175.69, 156.18, 135.99, 129.49, 129.45, 128.54, 127.15, 127.00, 116.79, 38.80.

**(S)-2-(4-fluorophenoxy)-3-phenylpropanoic acid (2w)**

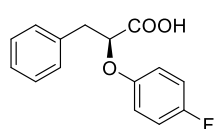

White solid, 95% yield, 93% *ee*. HPLC condition: Chiralcel OD-H column (25 cm × 0.46 cm ID), hexane/2-propanol=92:8, flow rate=0.8 mL/min, 254 nm UV detector,  $t_R$ =17.19 min for major isomer (*S*), and  $t_R$ =19.17 min for minor isomer (*R*);  $^1\text{H}$  NMR (400 MHz,  $\text{CDCl}_3$ )  $\delta$  7.32-7.29 (m, 5H), 6.93-6.78 (m, 4H), 4.74 (brs, 1H), 3.26 (s, 2H).  $^{13}\text{C}$  NMR (100 MHz,  $\text{CDCl}_3$ )  $\delta$  176.09, 159.15, 156.77, 153.76, 136.16, 129.48, 128.54, 127.12, 116.96, 116.13, 115.90, 38.88.

**(S)-2-phenoxyhexanoic acid (2x)**

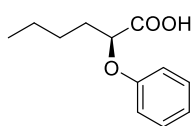

White solid, 97% yield, 88% *ee*. HPLC condition: Chiralcel OD-H column (25 cm × 0.46 cm ID), hexane/2-propanol=92:8, flow rate=1.0 mL/min, 254 nm UV detector,  $t_R$ =8.69 min for major isomer, and  $t_R$ =9.83 min for minor isomer;  $^1\text{H}$  NMR (400 MHz,  $\text{CDCl}_3$ )  $\delta$  7.31-7.29 (m, 2H), 7.03-6.94 (m, 3H), 4.67 (brs, 1H), 2.01 (brs, 2H), 1.46-1.24 (m, 4H), 0.96-0.93 (m, 3H).  $^{13}\text{C}$  NMR (100 MHz,  $\text{CDCl}_3$ )  $\delta$  157.71, 129.64, 121.80, 115.17, 36.74, 34.98, 32.44, 29.71, 27.36, 22.33, 13.87.

**(S)-5-methyl-2-phenoxyhexanoic acid (2y)**

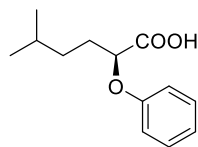

White solid, 96% yield, 85% *ee*. HPLC condition: Chiralcel AD-H column (25 cm × 0.46 cm ID), hexane/2-propanol=90:10, flow rate=1.0 mL/min, 254 nm UV detector,  $t_R$ =7.94 min for major isomer, and  $t_R$ =9.41 min for minor isomer;  $^1\text{H}$  NMR (400 MHz,  $\text{CDCl}_3$ )  $\delta$  7.32-7.29 (m, 3H), 7.03-7.00 (m, 1H), 6.93 (d,  $J$  = 8.0 Hz, 3H), 4.64 (brs, 1H), 2.02-2.00 (m, 2H), 1.64-1.61 (m, 1H), 1.50-1.41 (m, 2H), 0.94 (d,  $J$  = 8.0 Hz, 6H).  $^{13}\text{C}$  NMR (100 MHz,  $\text{CDCl}_3$ )  $\delta$  177.03, 157.74, 129.64, 121.78, 115.16, 34.20, 30.74, 27.81, 22.52, 22.34.

**(S)-5-methyl-2-phenoxyhexanoic acid (2y)**

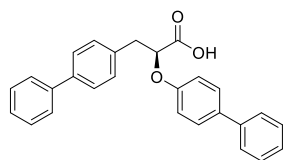

White solid, 97% yield, 90% *ee*, 95% *ee* after one recrystallization. HPLC condition: Chiralcel AS-H column (25 cm × 0.46 cm ID), hexane/2-propanol=90:10, flow rate=0.8 mL/min, 254 nm UV detector,  $t_R$ =18.44 min for major isomer, and  $t_R$ =28.75 min for minor isomer;  $^1\text{H}$  NMR (400 MHz,  $\text{CDCl}_3$ )  $\delta$  7.61-7.51 (m, 8H), 7.47-7.41 (m, 6H), 7.38-7.32 (m, 2H), 6.98 (d,  $J$  = 8.0 Hz, 2H), 4.98 (t,  $J$ =4.0 Hz, 1H), 3.39 (t,  $J$ =4.0 Hz, 2H).  $^{13}\text{C}$  NMR (100 MHz,  $\text{CDCl}_3$ )  $\delta$  175.21, 157.05, 140.80, 140.50, 139.98, 135.26, 135.17, 129.95, 128.76, 128.34, 127.24, 127.05, 126.80, 115.66, 38.50.

## 5. Reference

- (1) S. Li, S.-F. Zhu, J.-H. Xie, S. Song, C.-M. Zhang and Q.-L. Zhou, *J. Am. Chem. Soc.*, **2010**, 132, 1172.
- (2) W.-P. Chen, P.-J. McCormack, K. Mohammed, W. Mbafor, S.-M. Roberts, J. Whittall, *Angew. Chem. Int. Ed.*, **2007**, 46, 4141.

## 6. NMR Spectra

### 6.1 NMR Spectra of the substrates

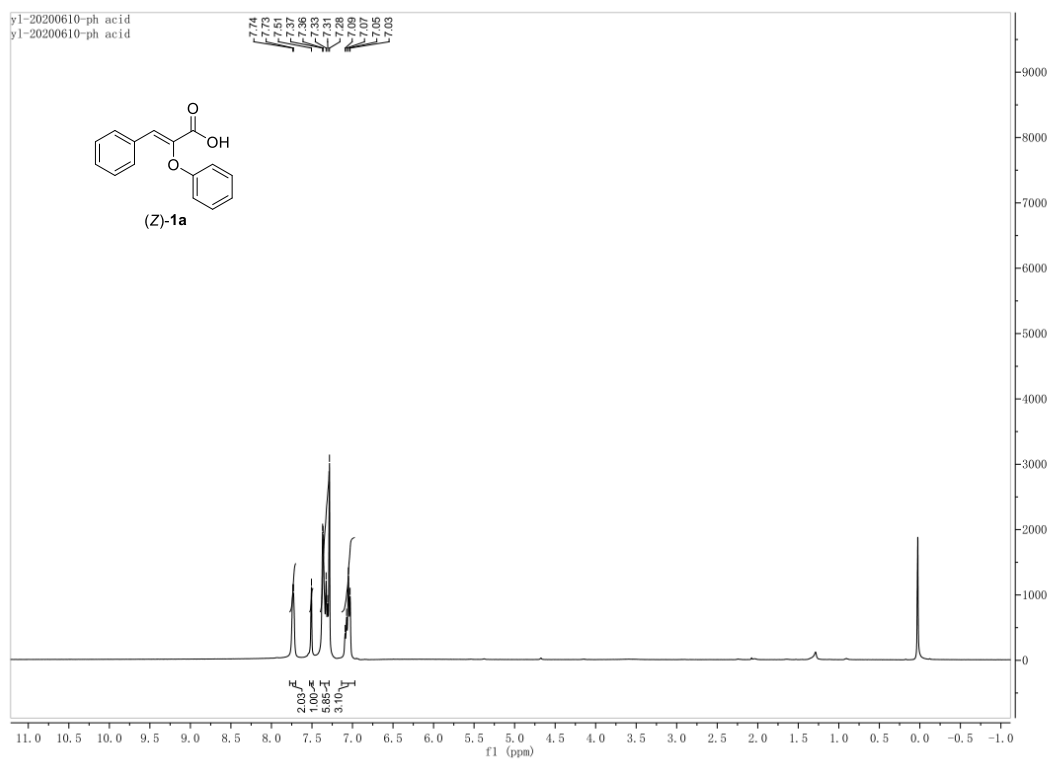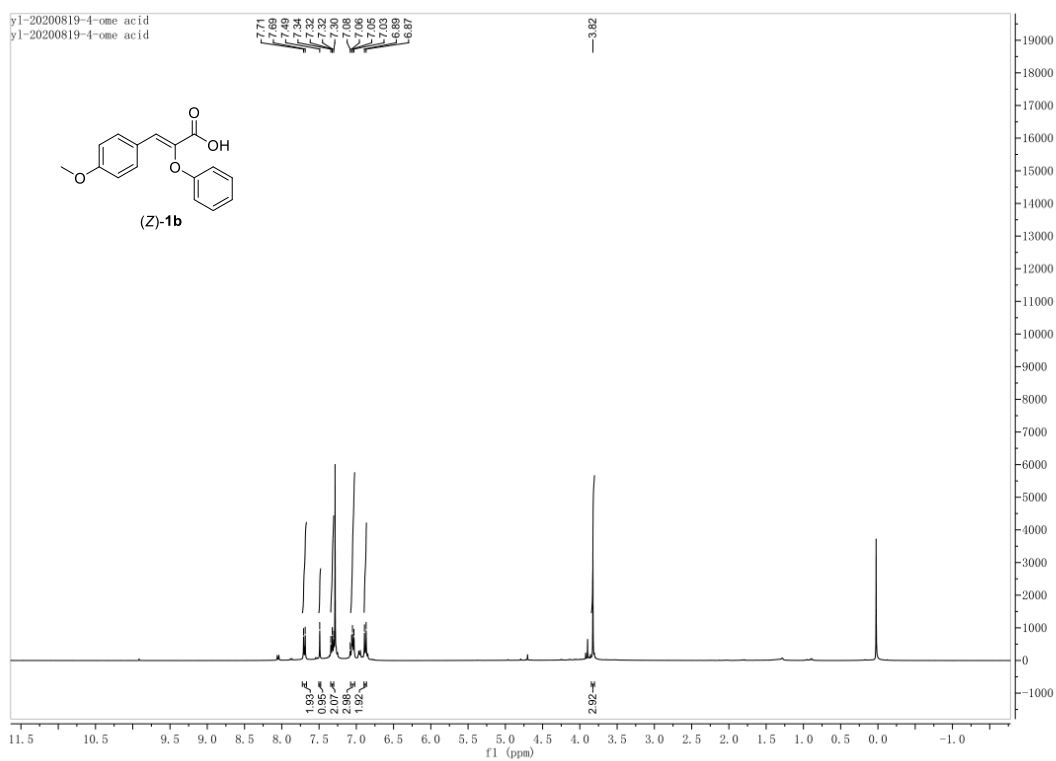

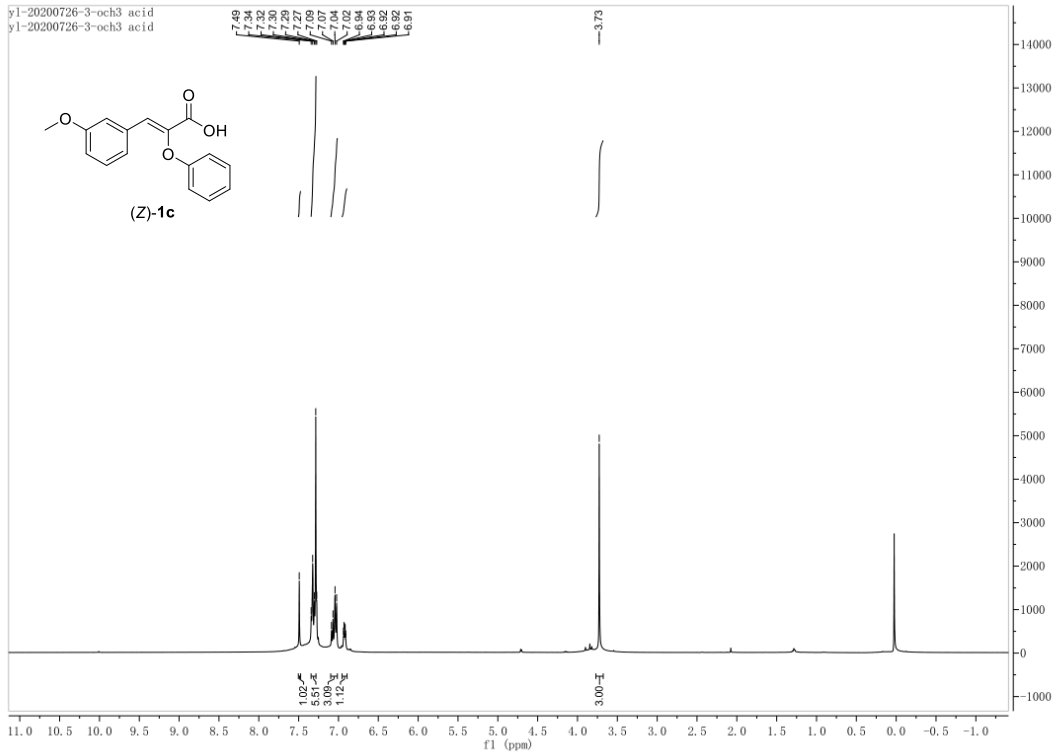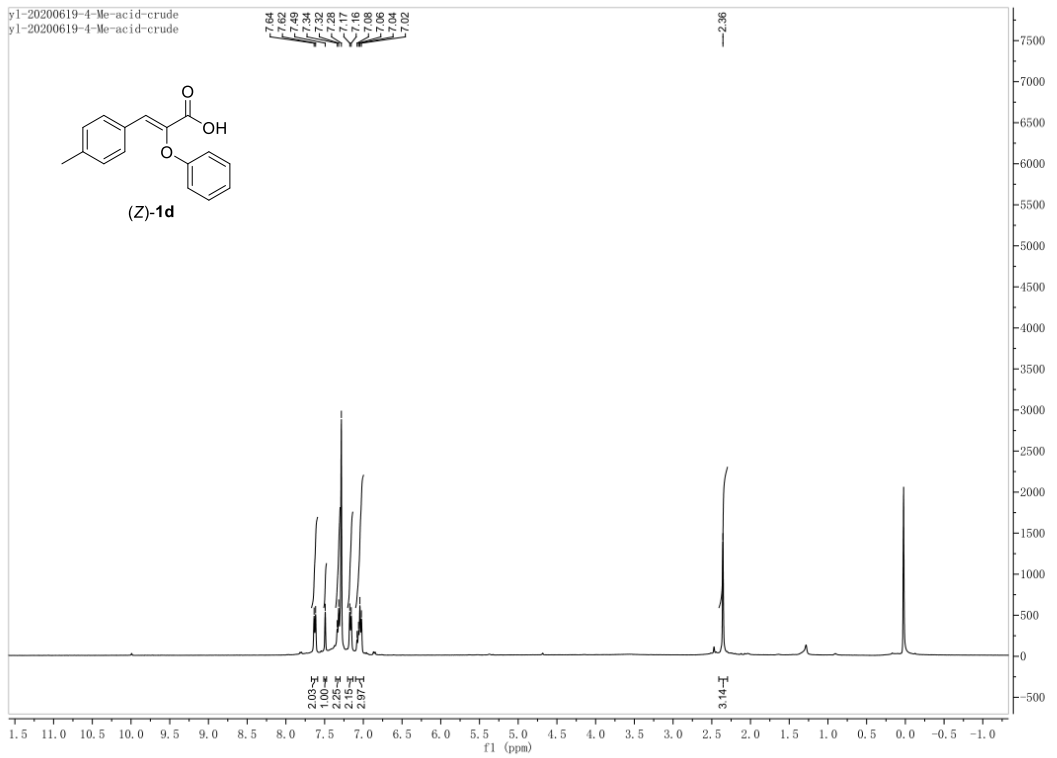

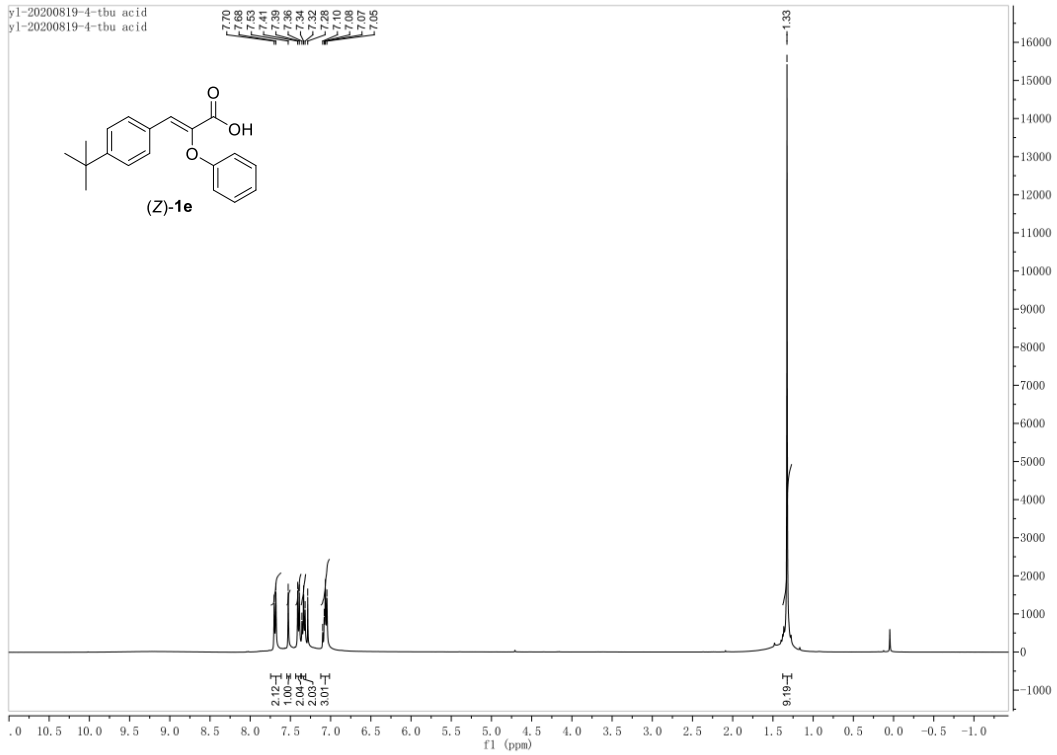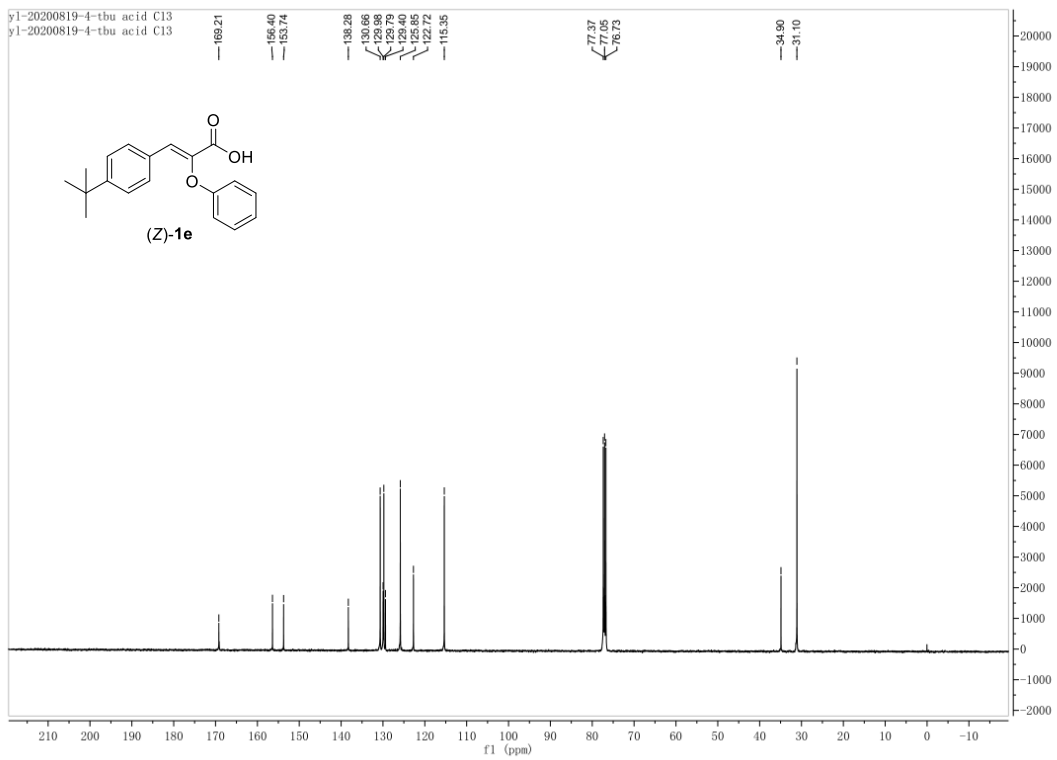

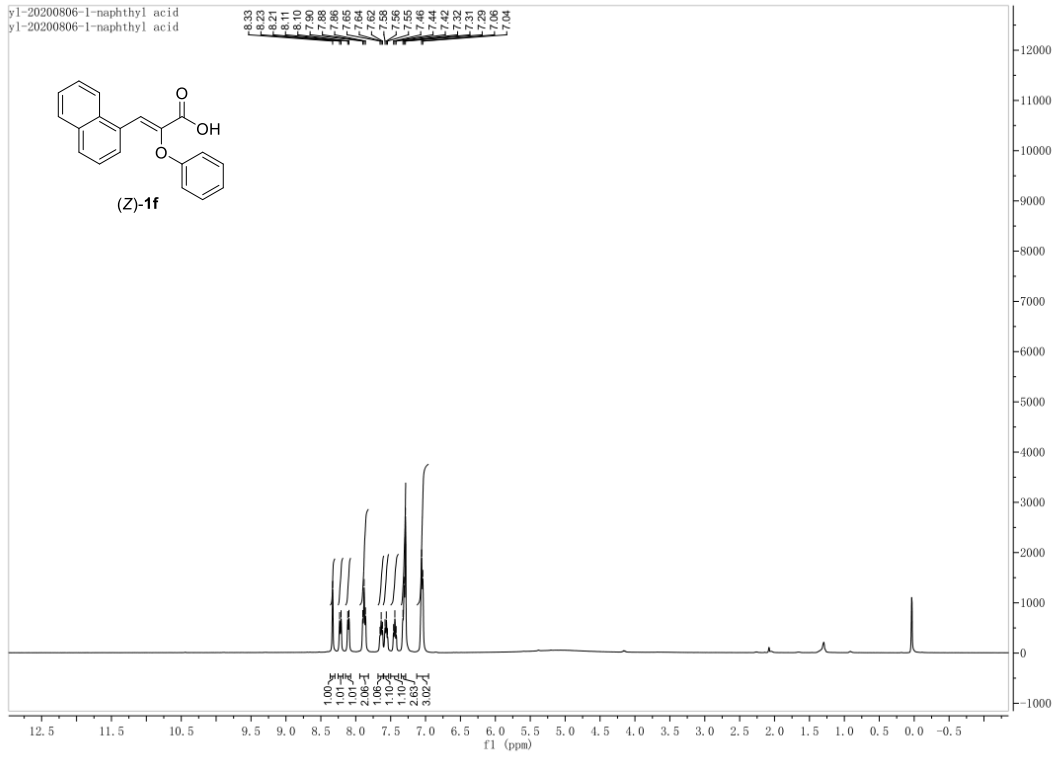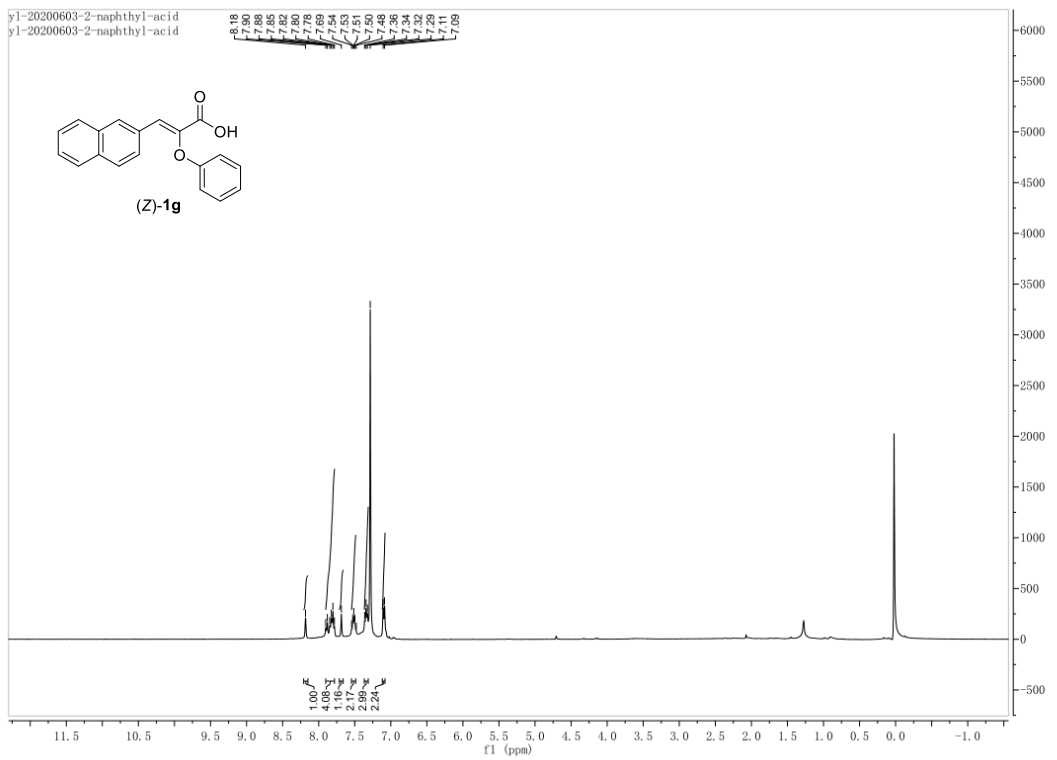

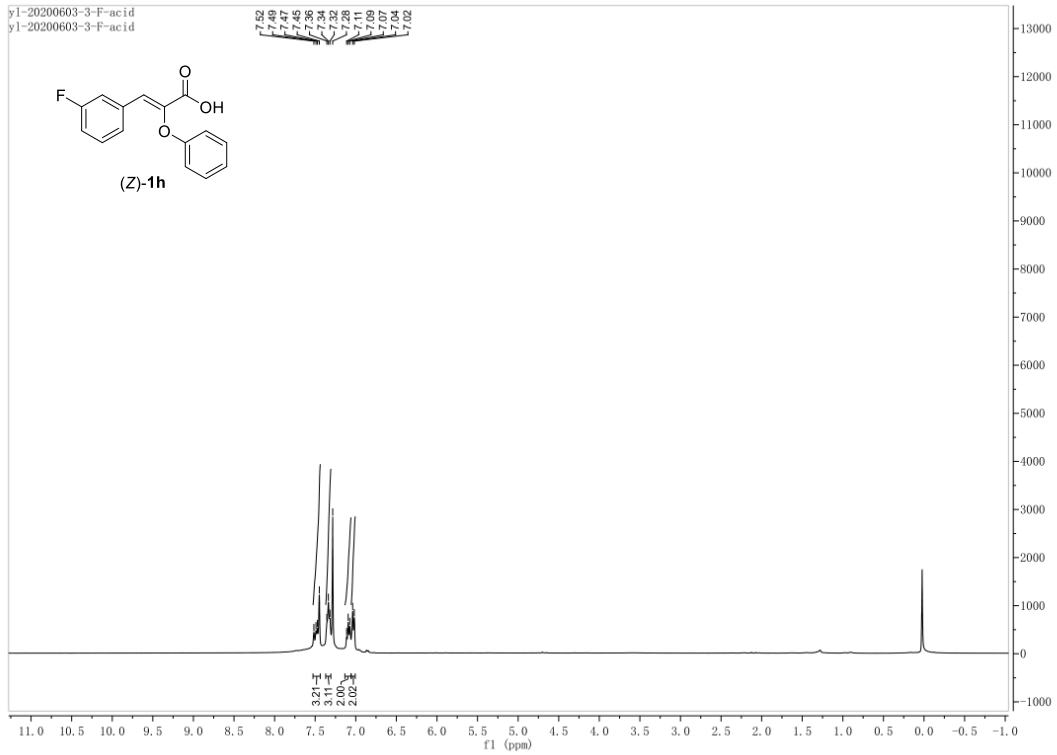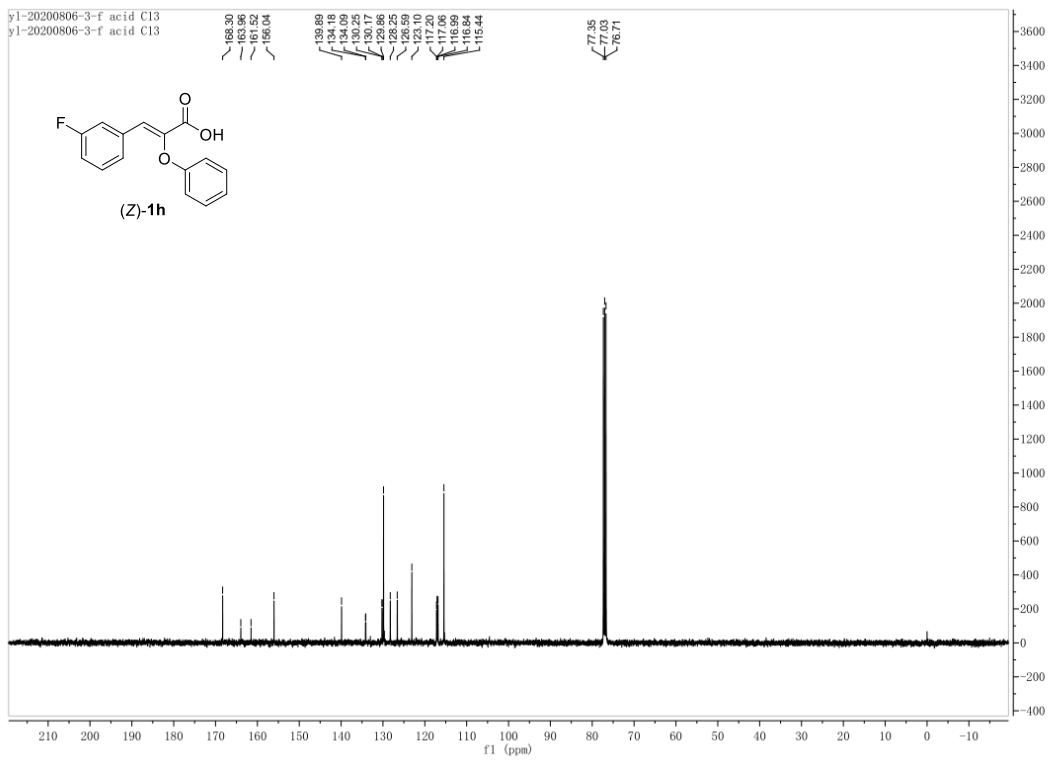

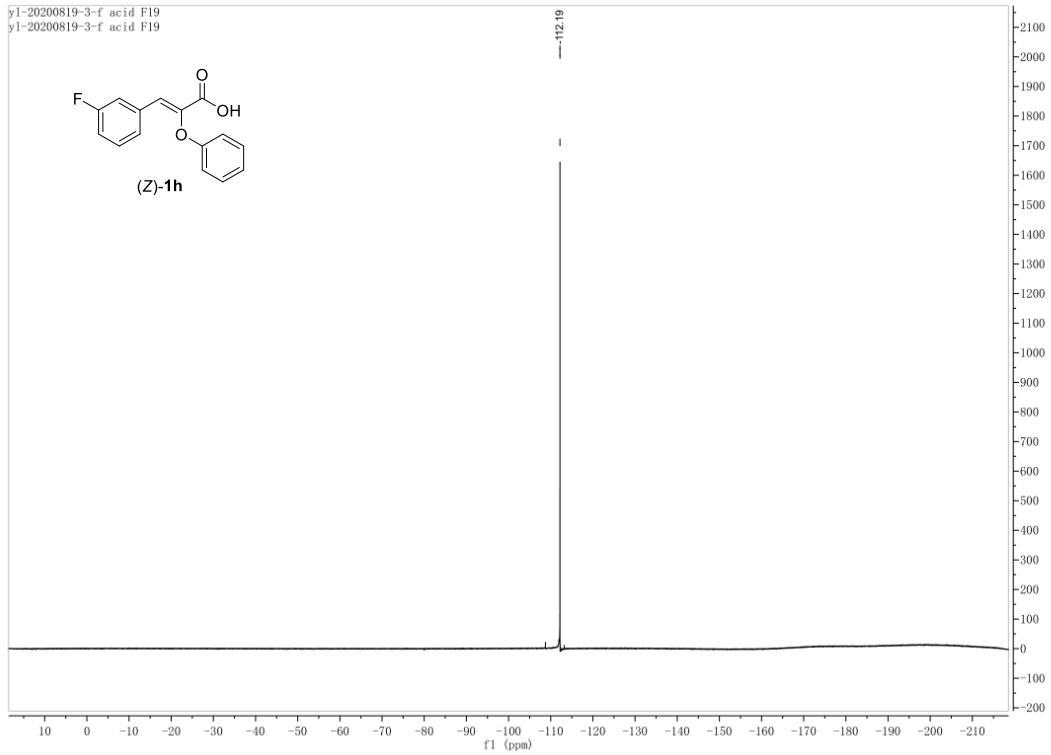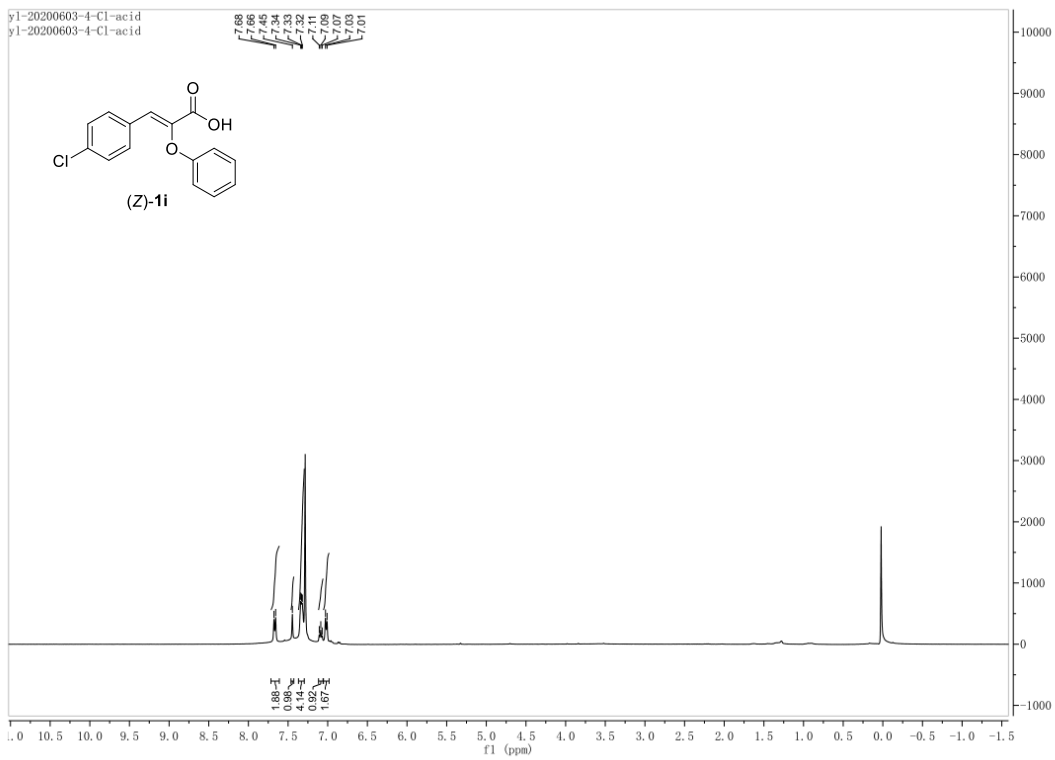



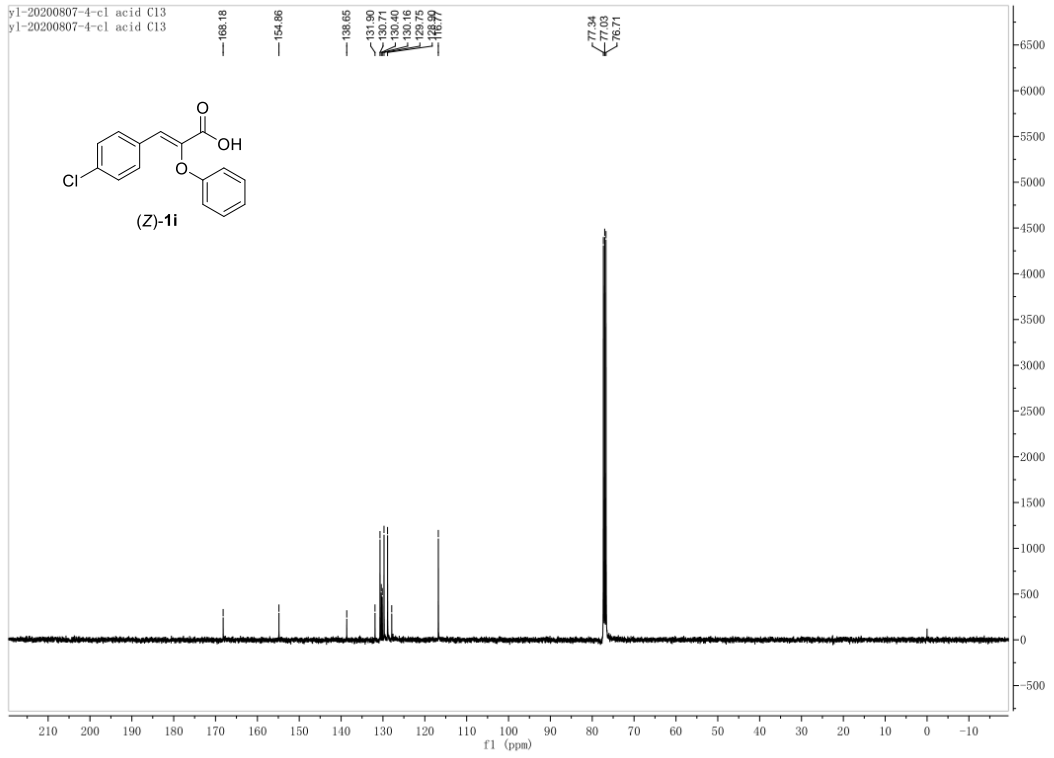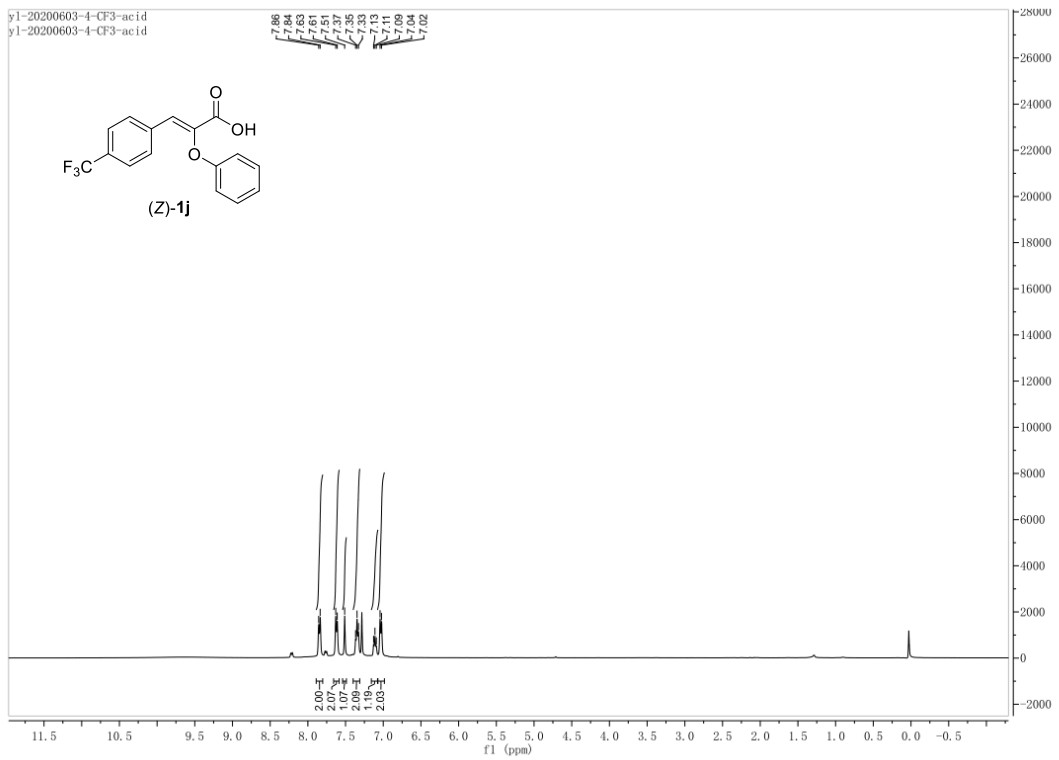

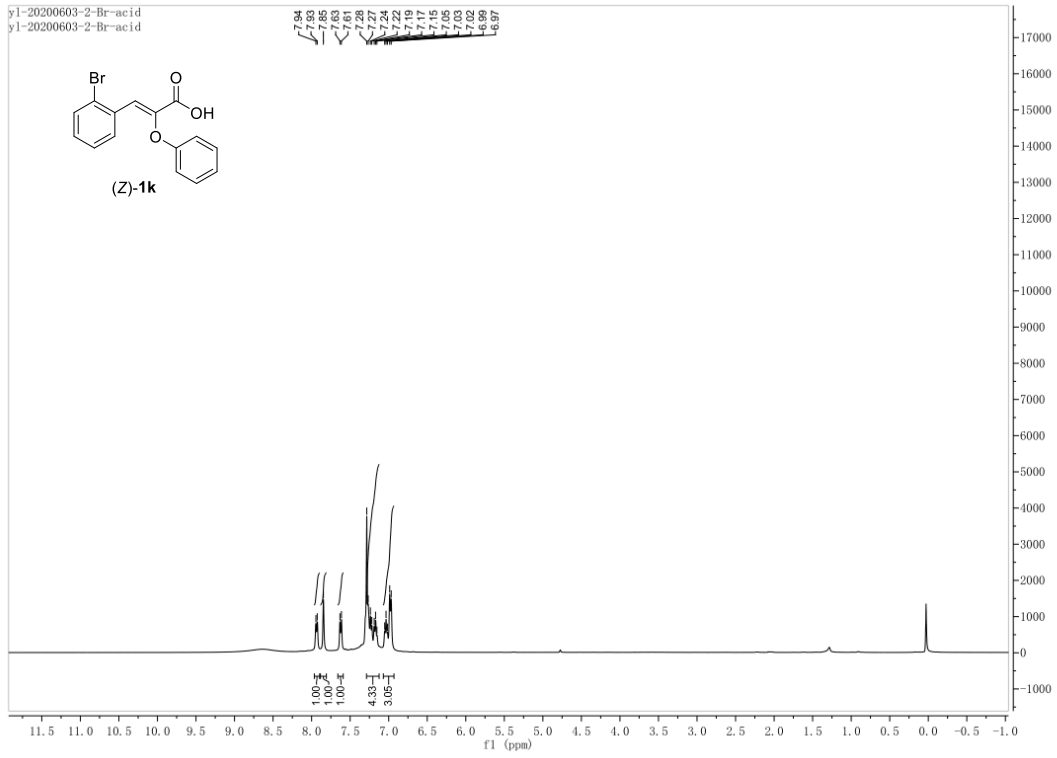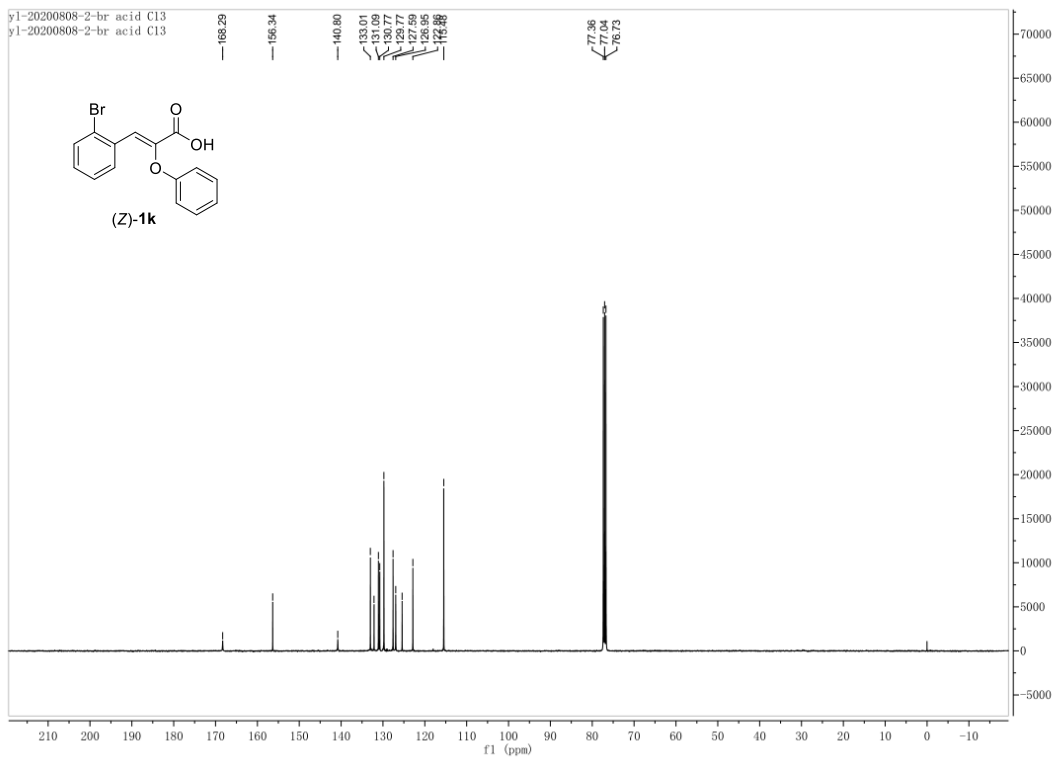

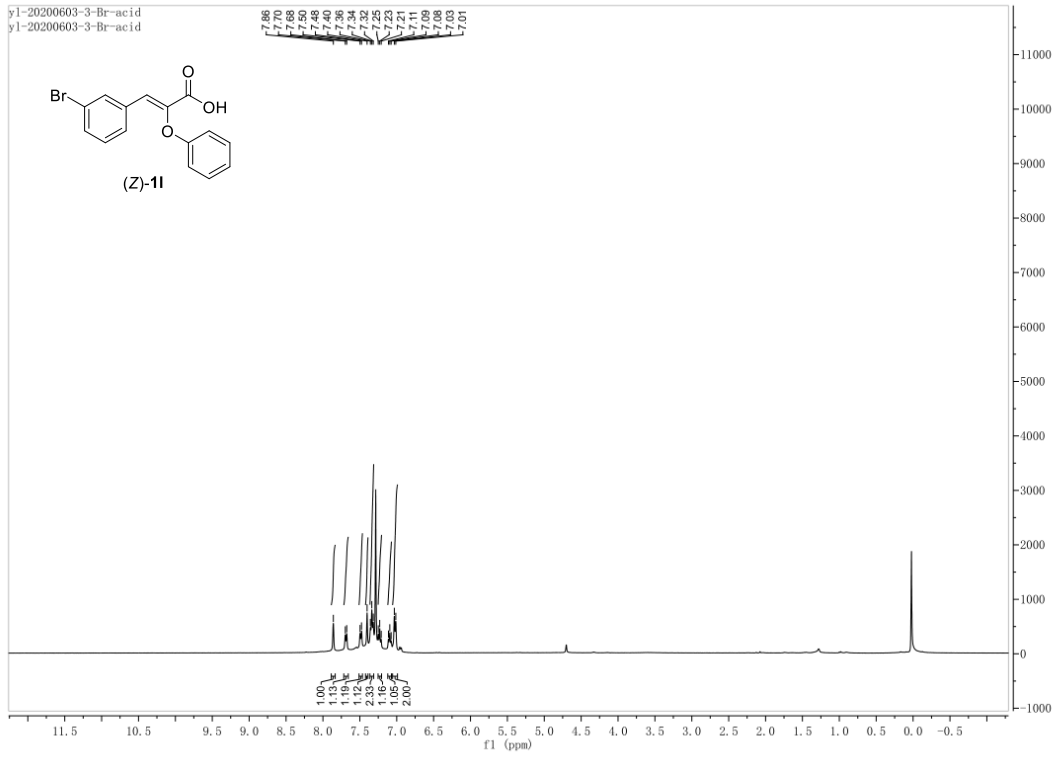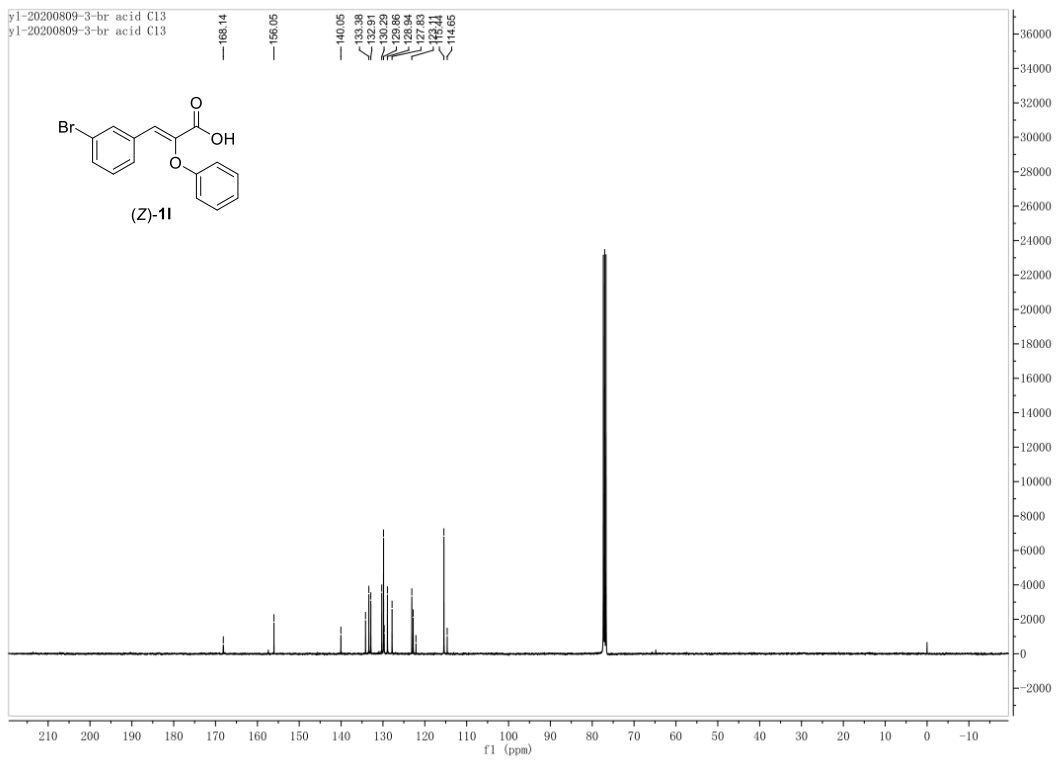

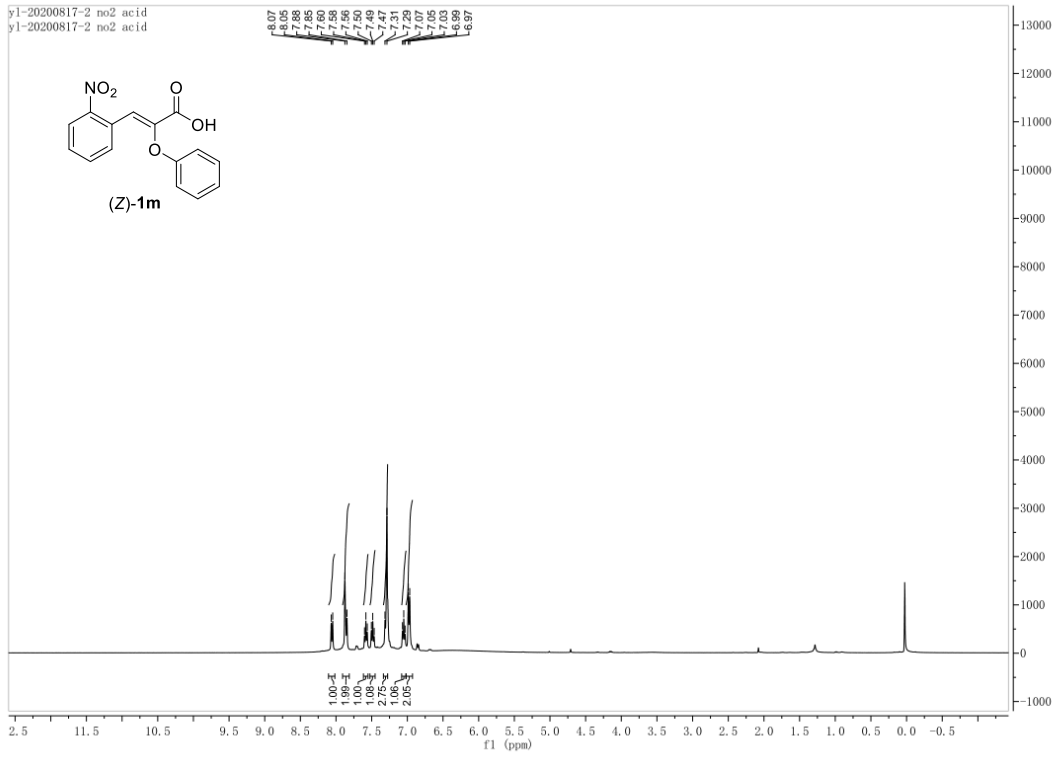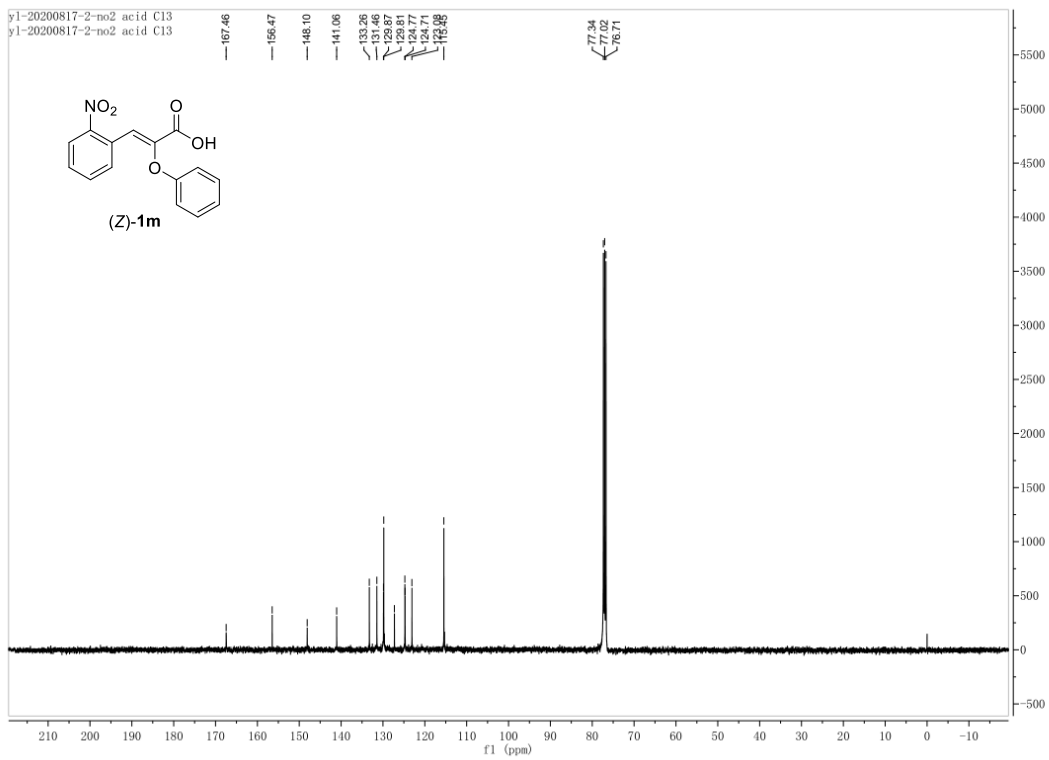

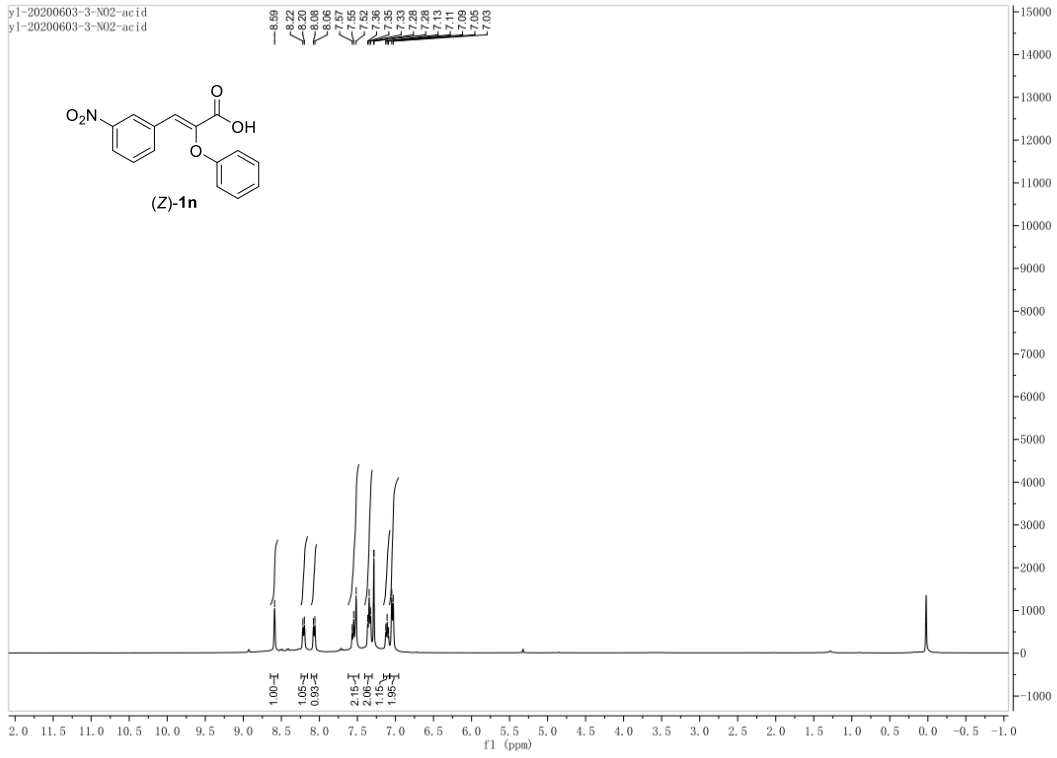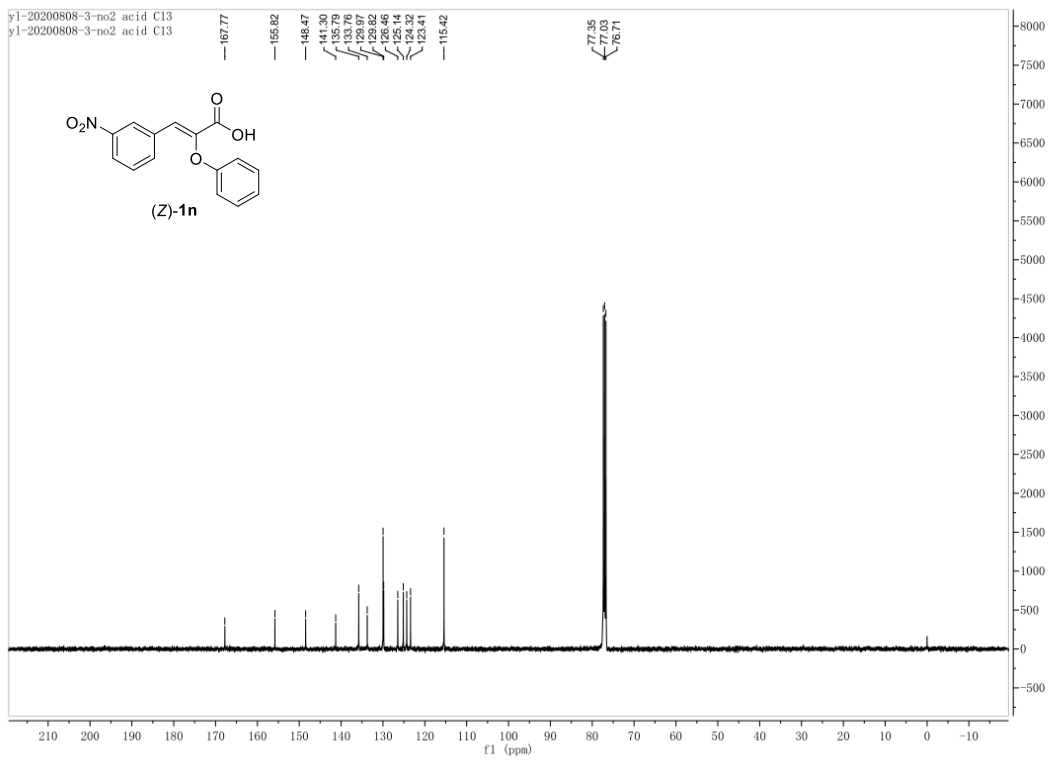

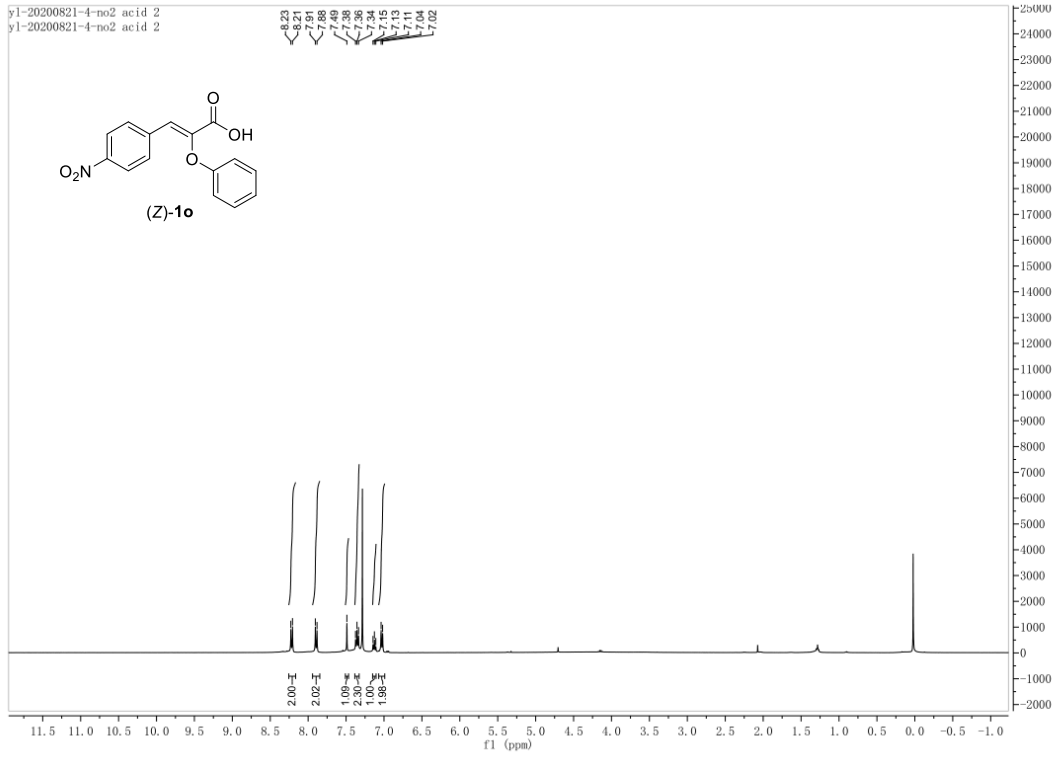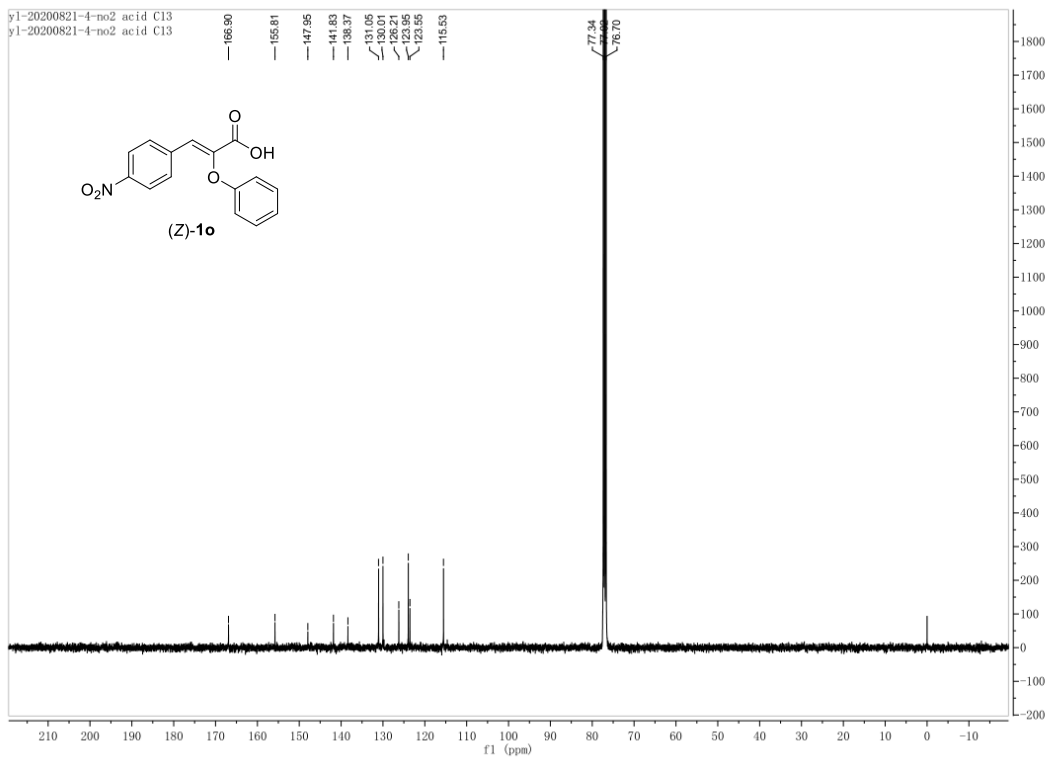

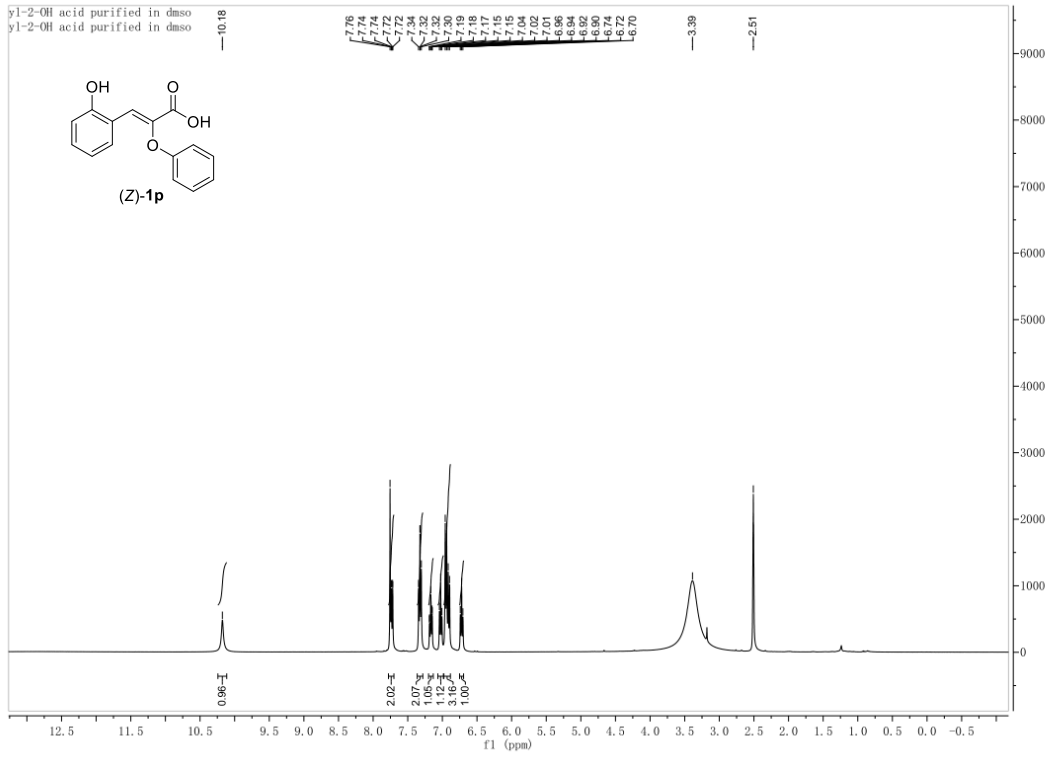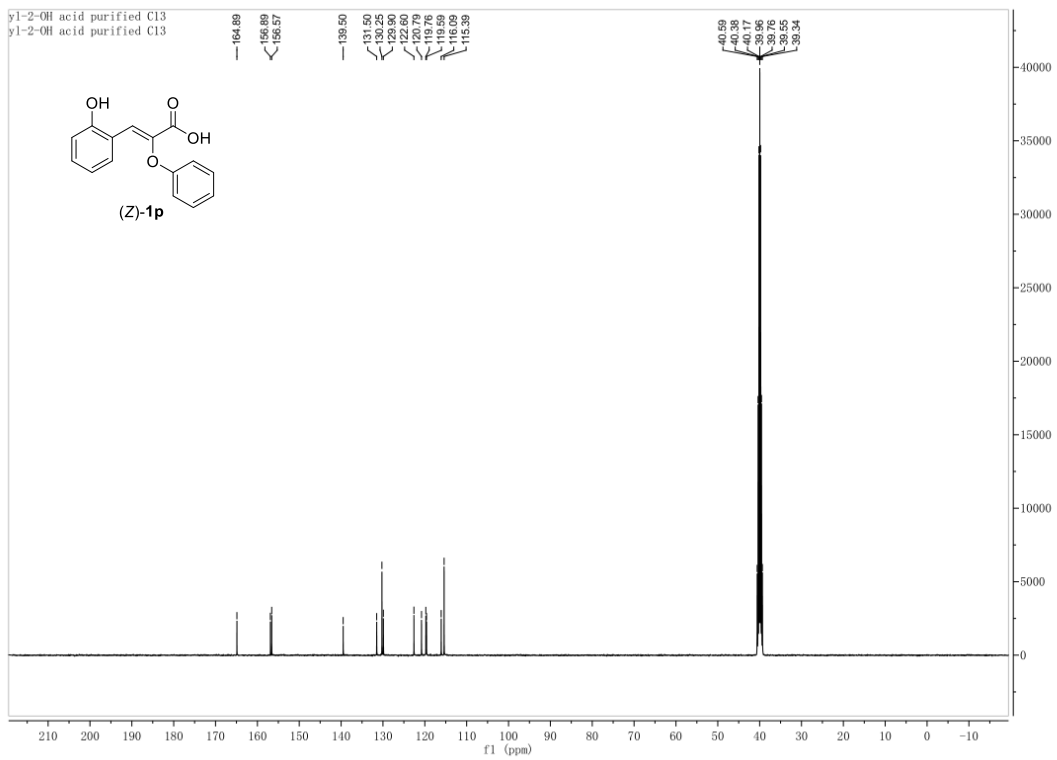

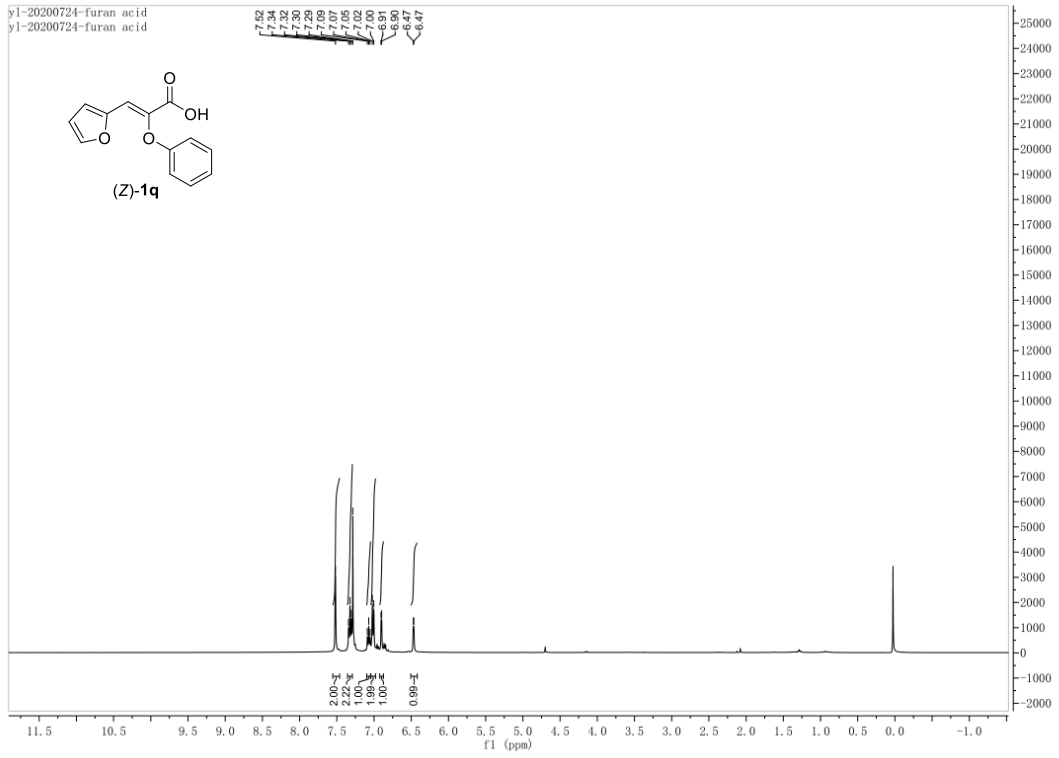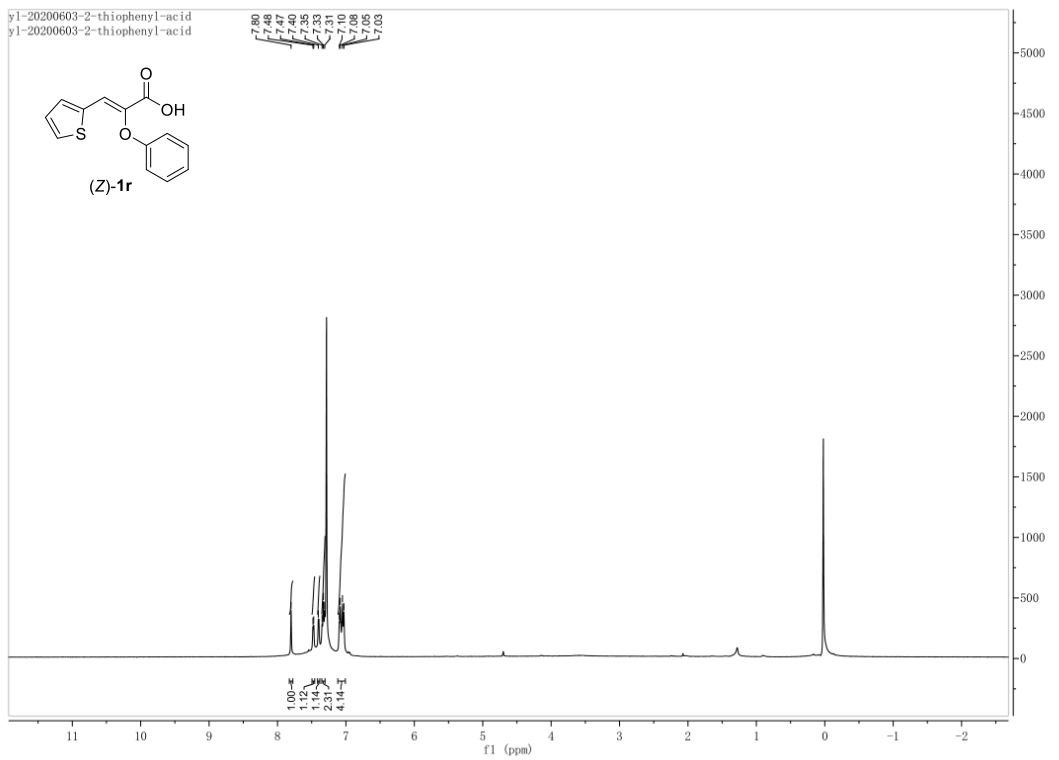



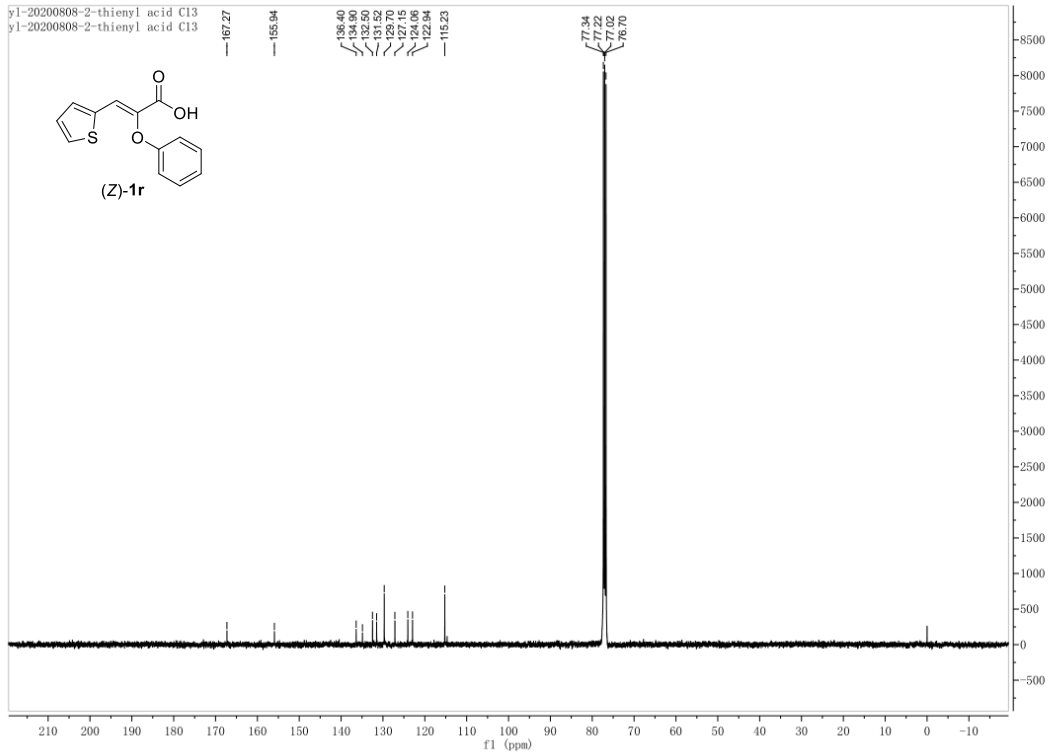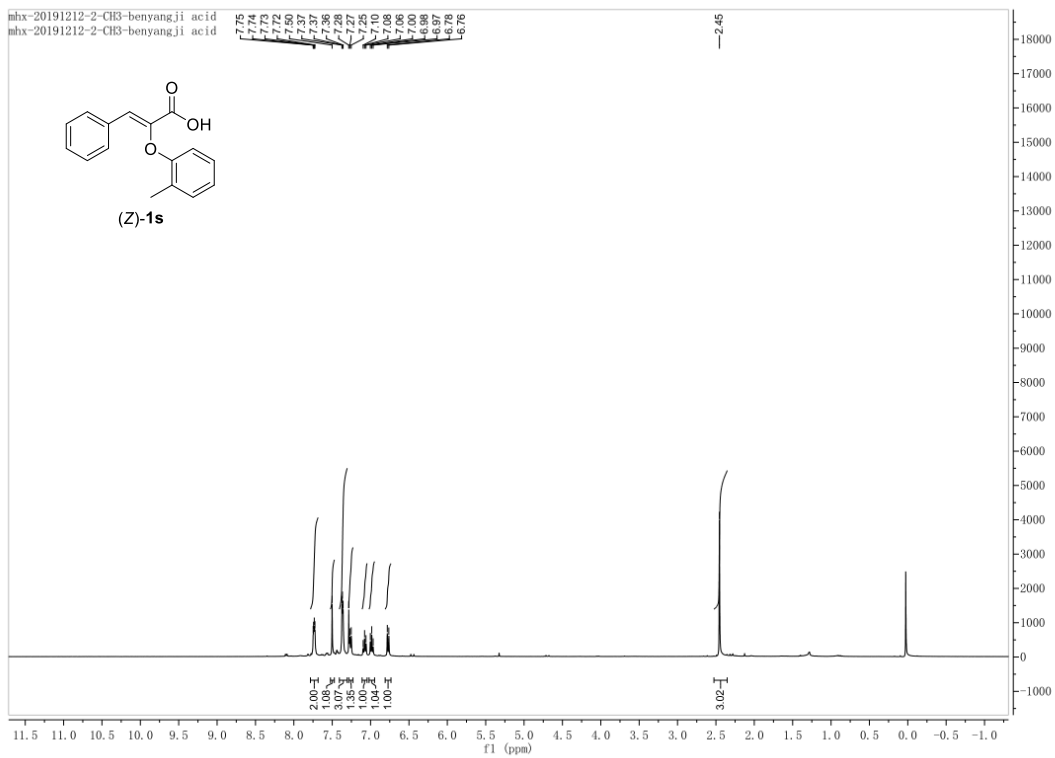

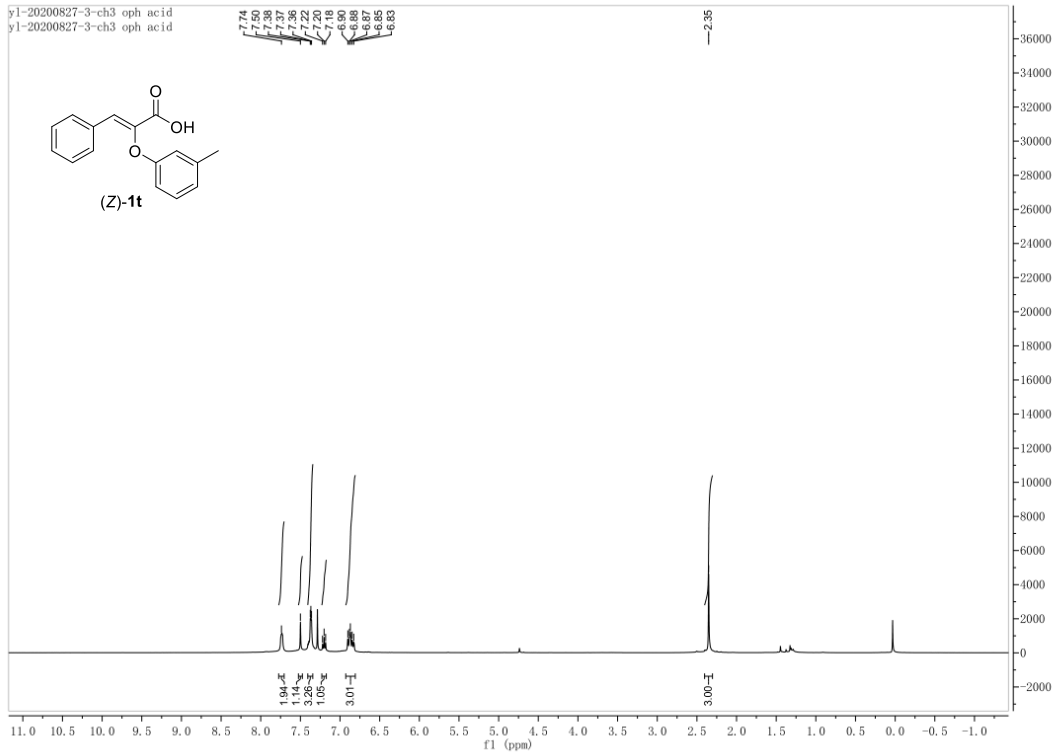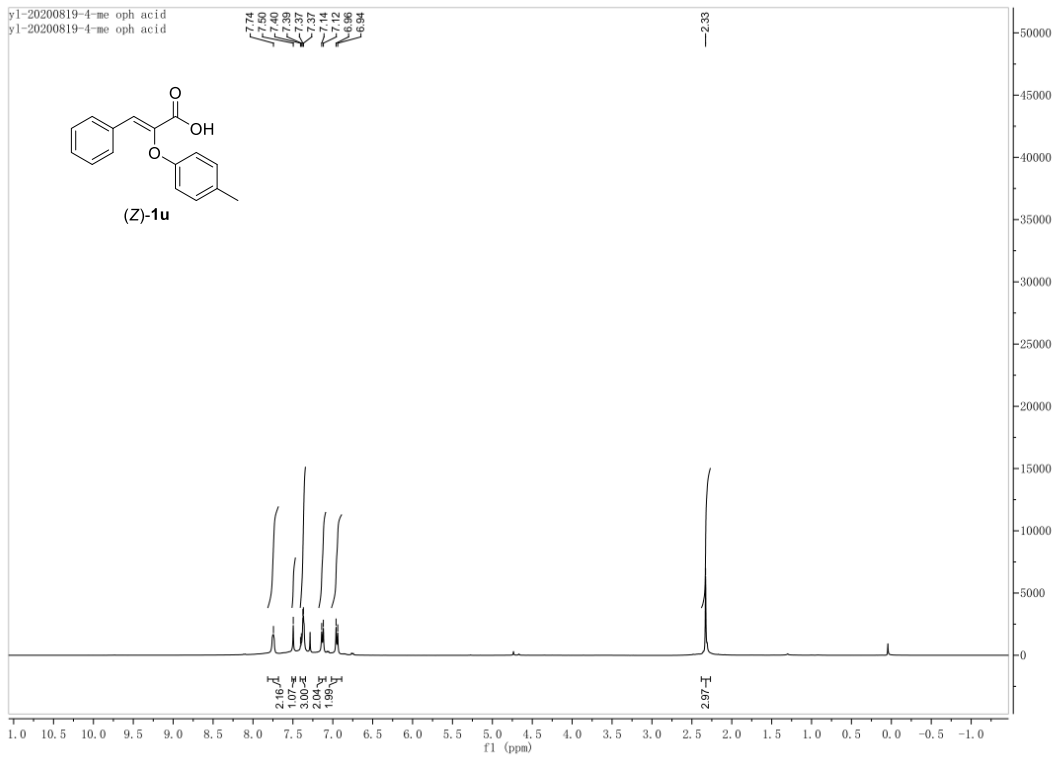

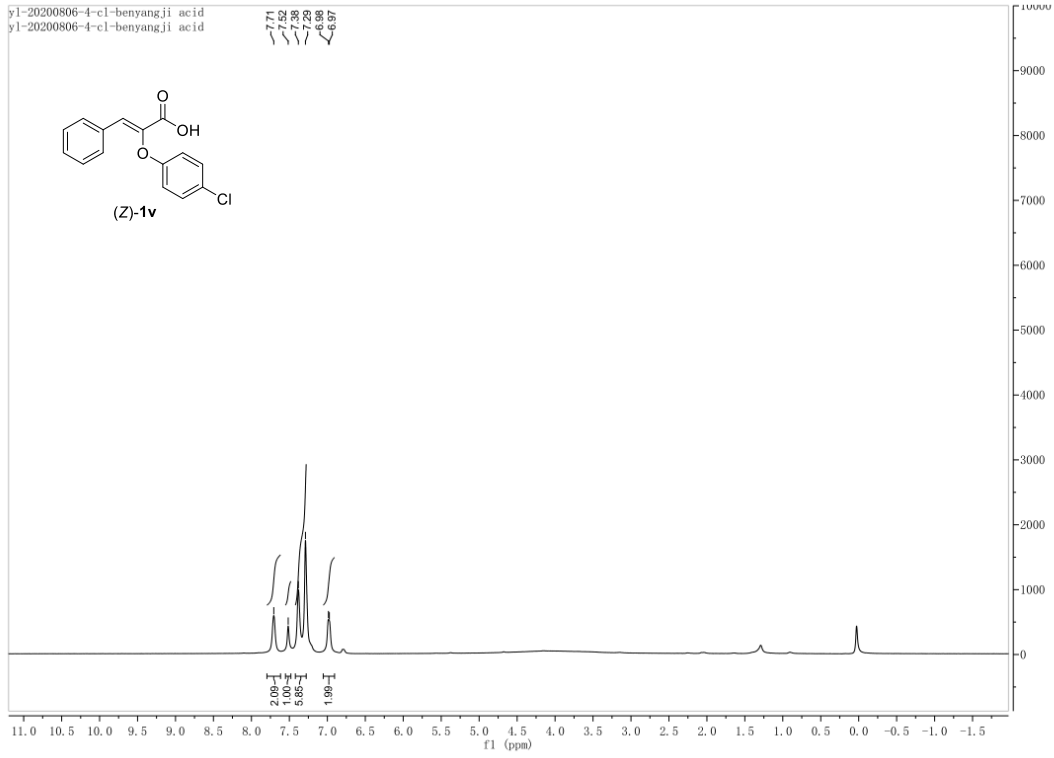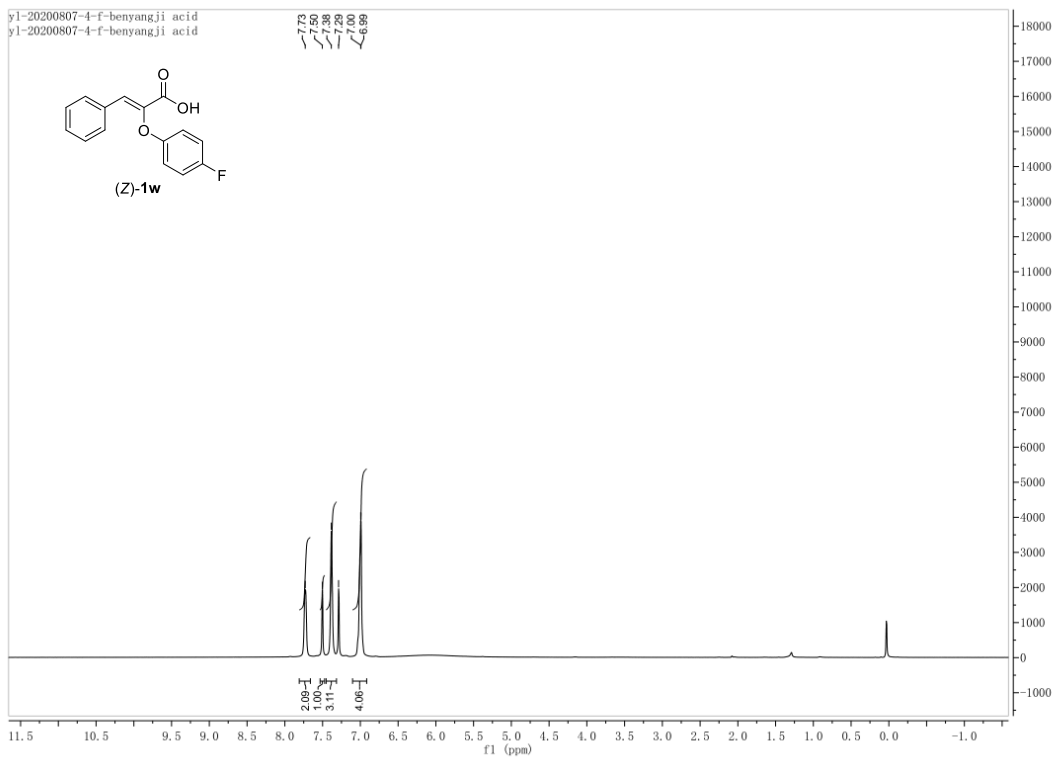

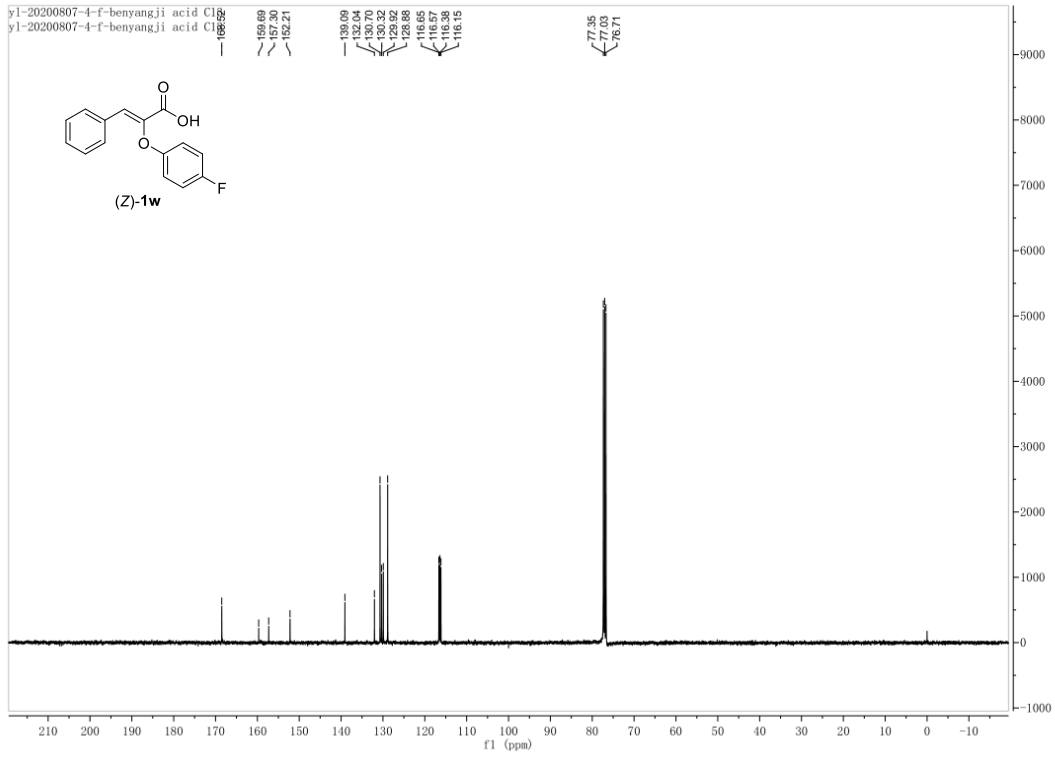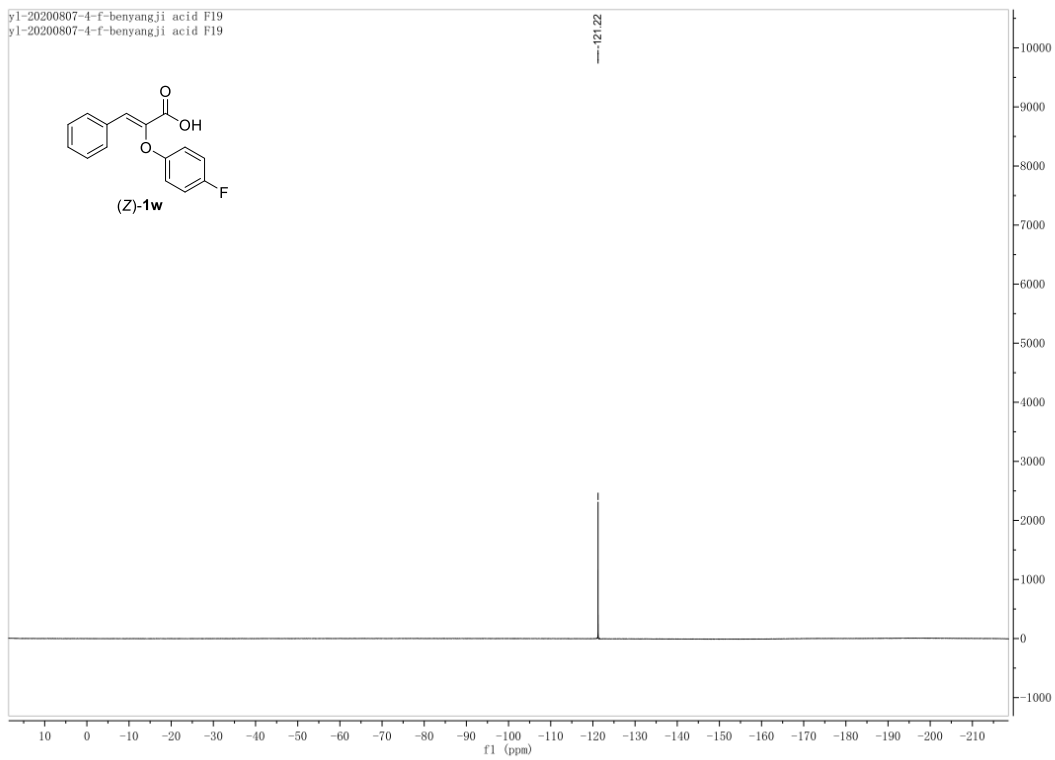

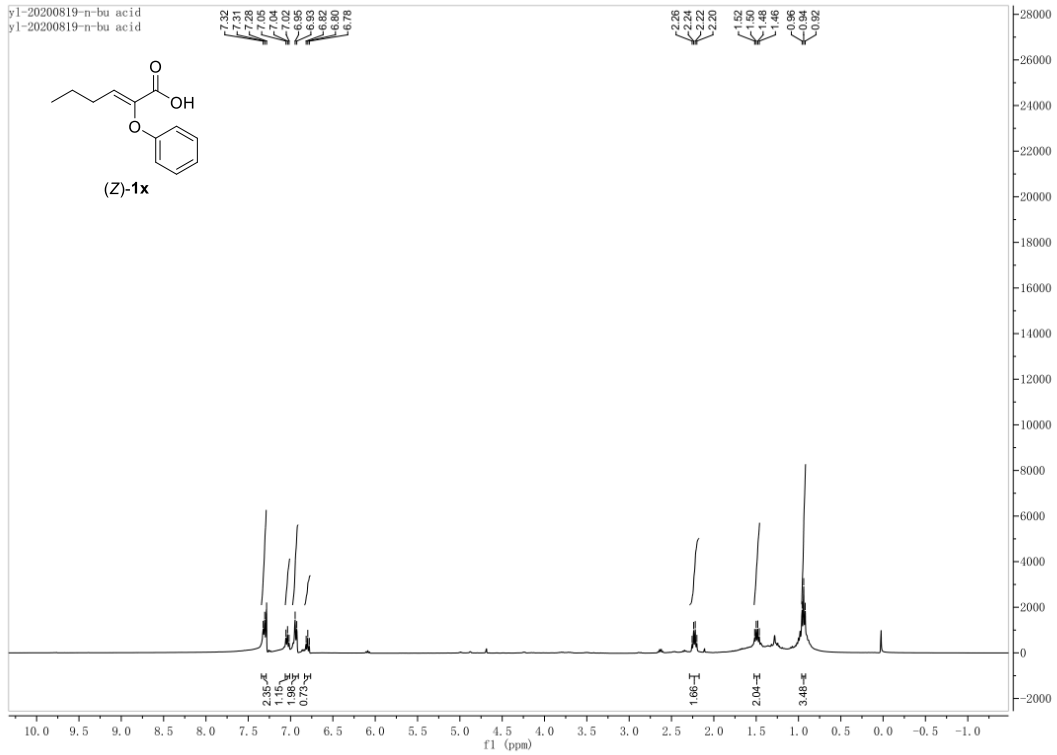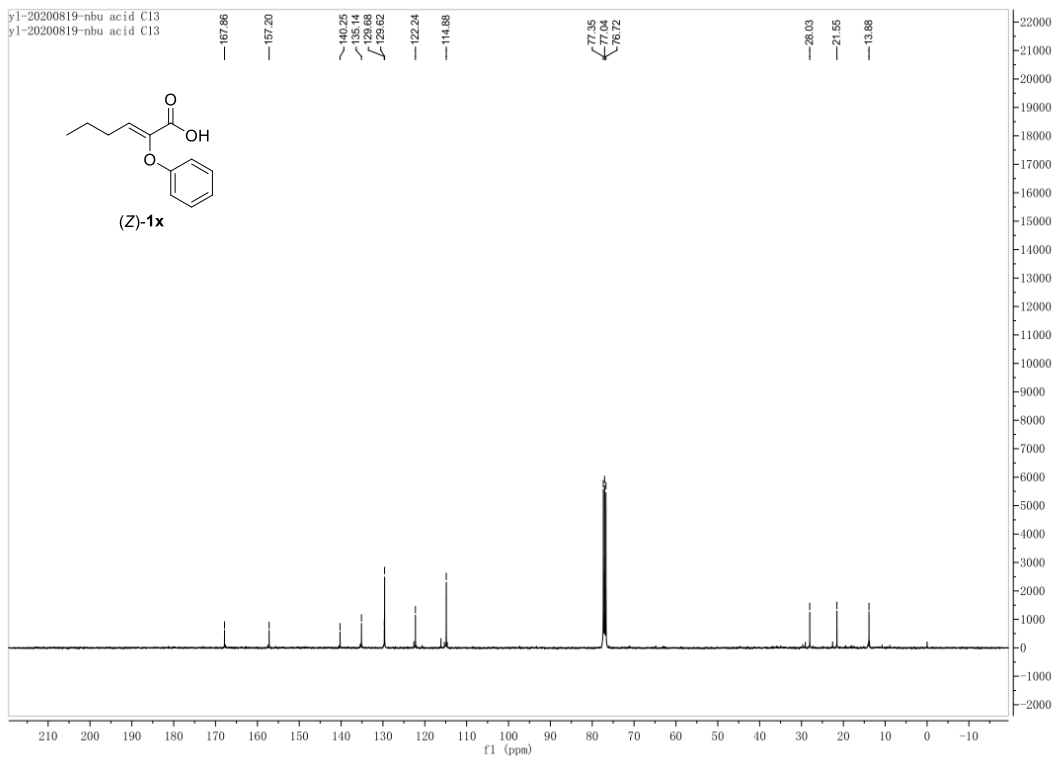

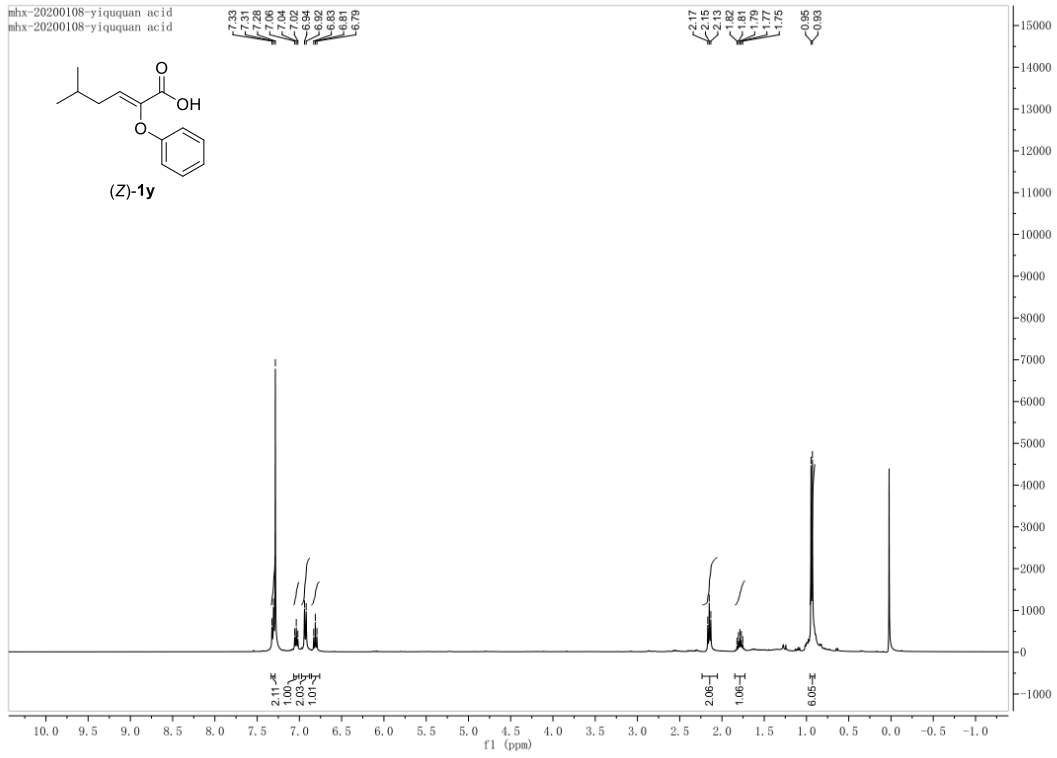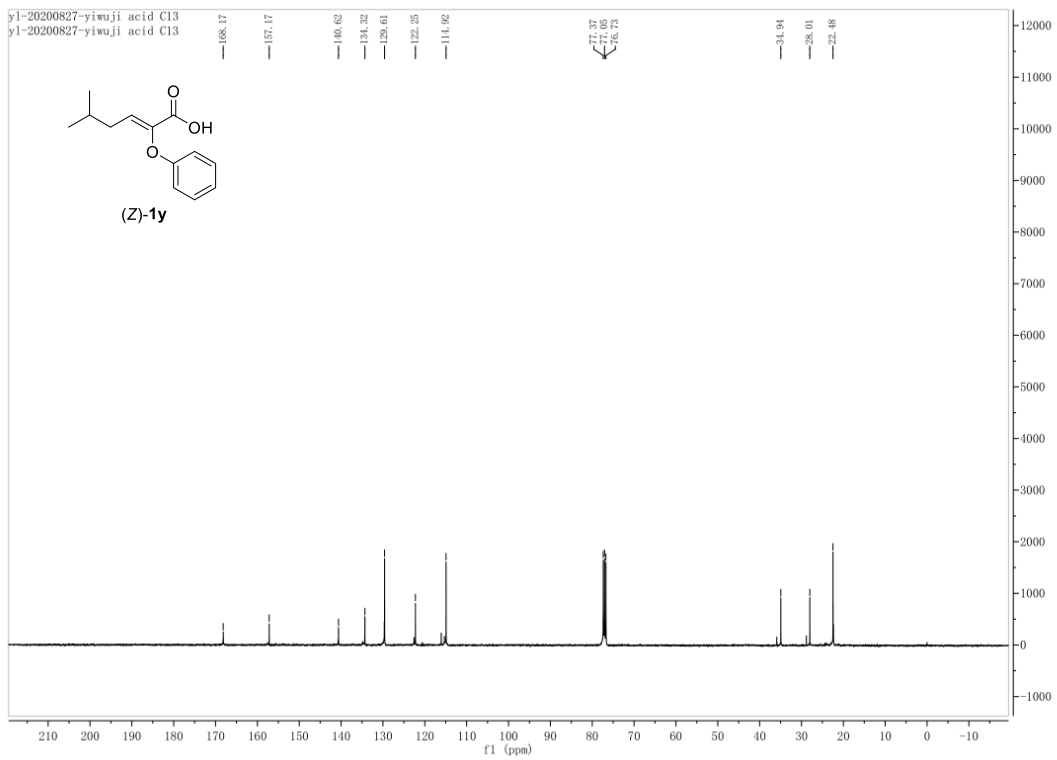

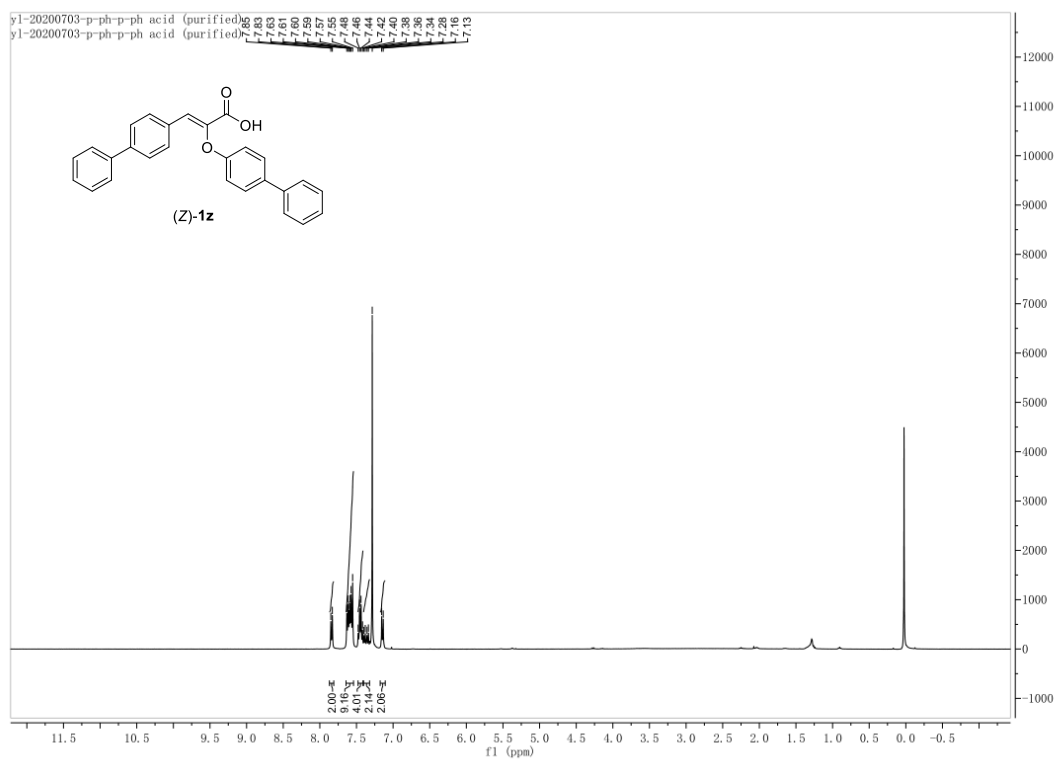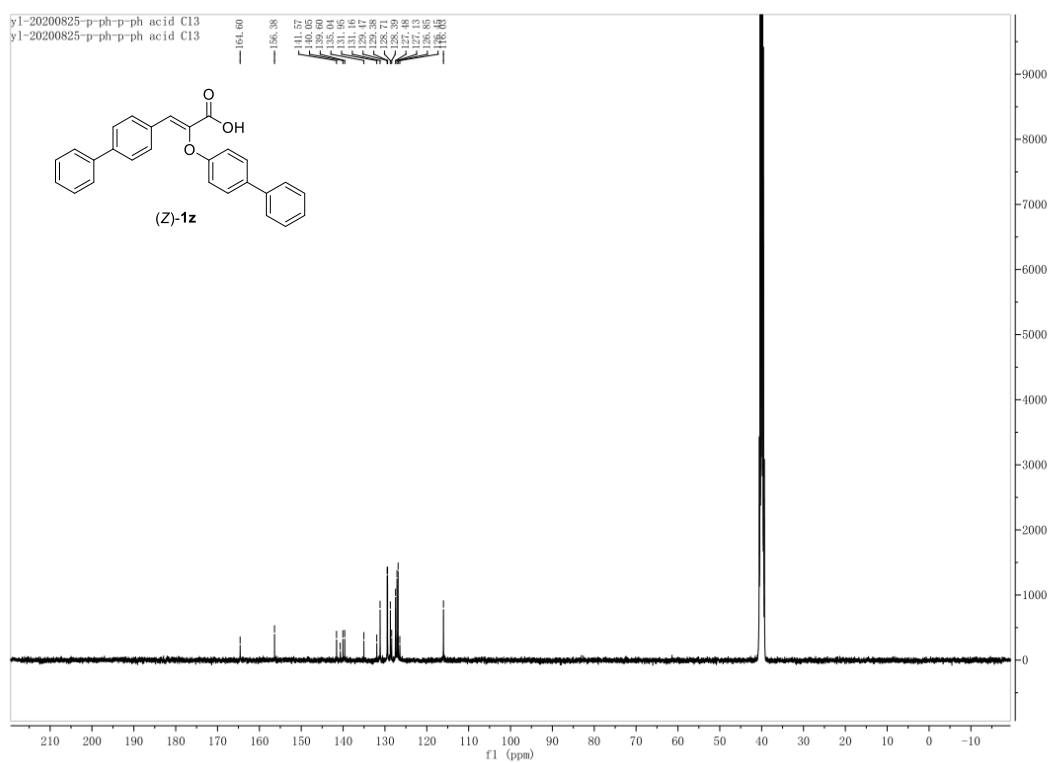

### 3.2 NMR spectra of chiral products

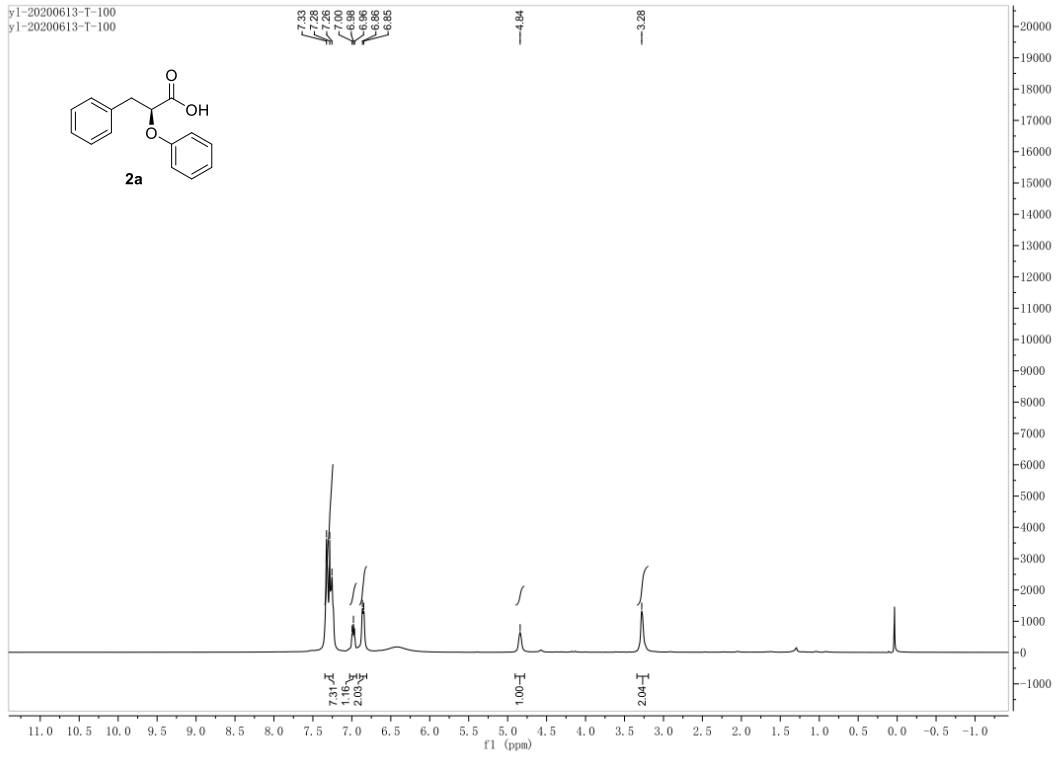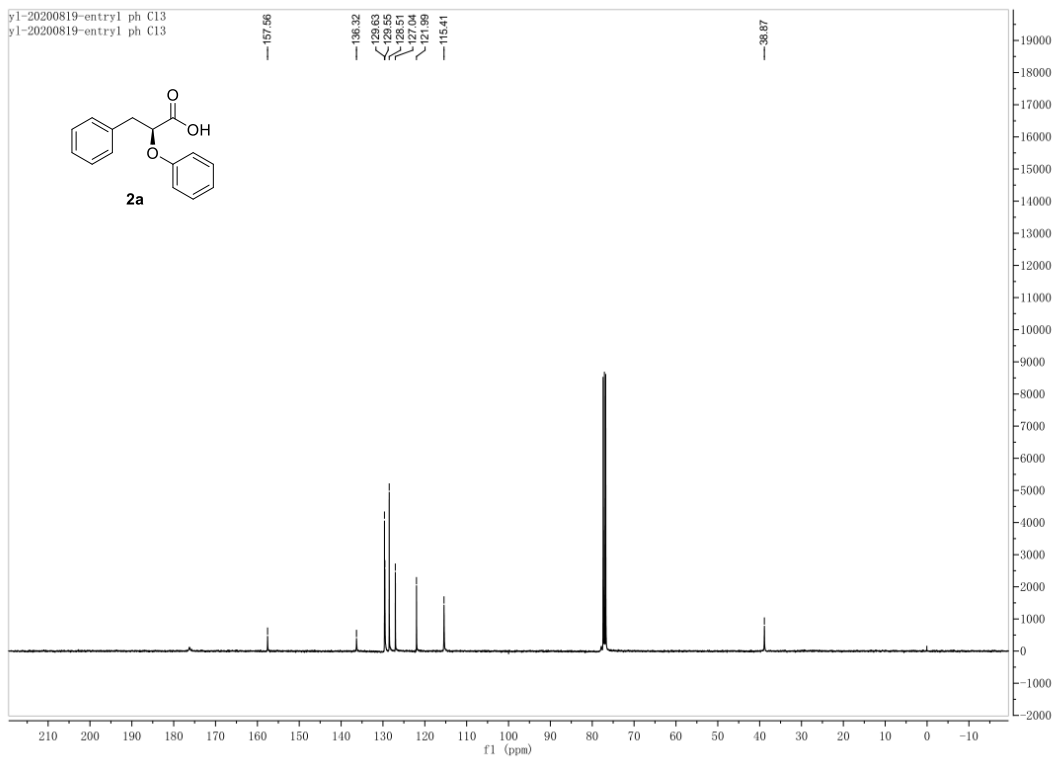



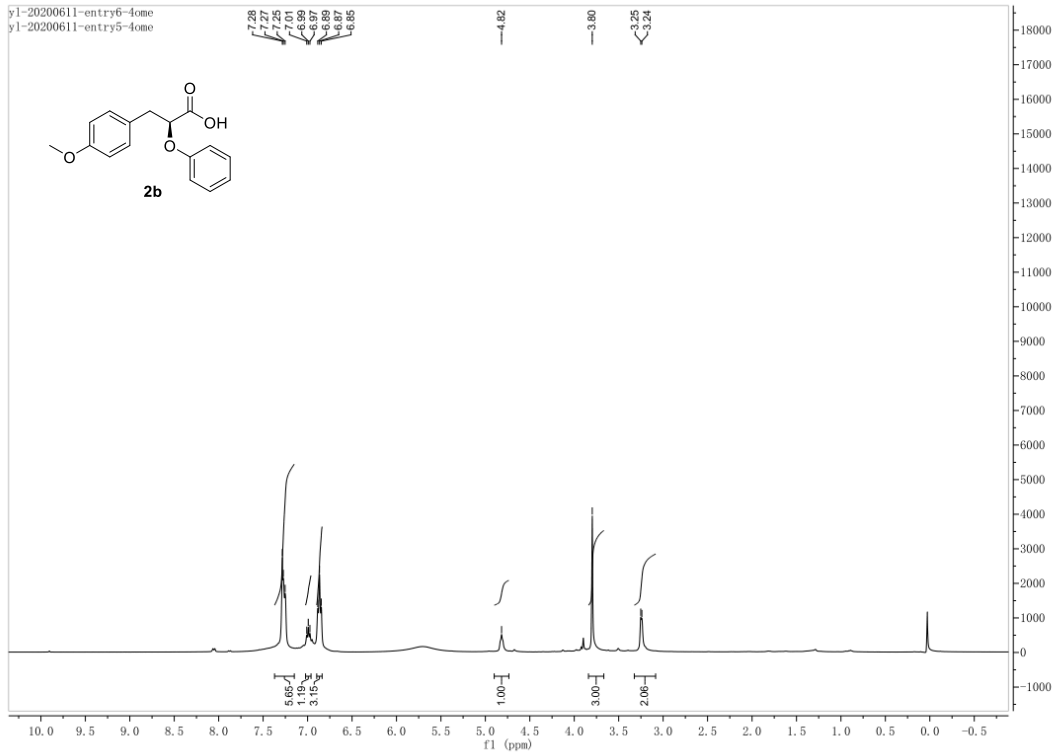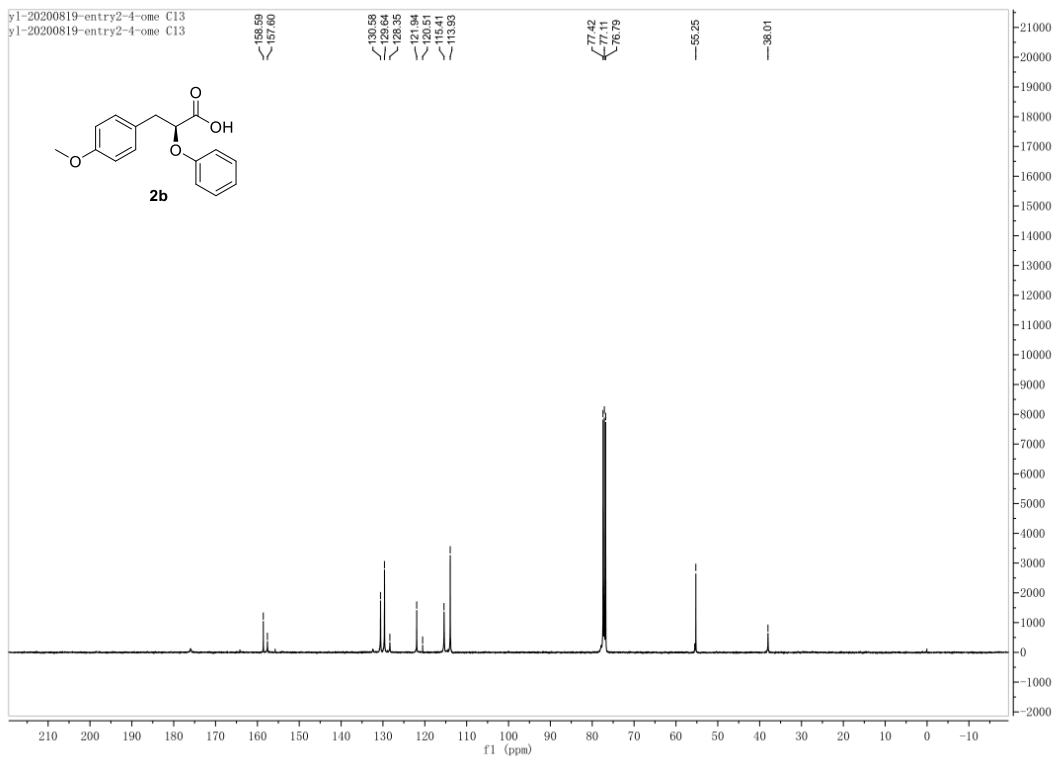

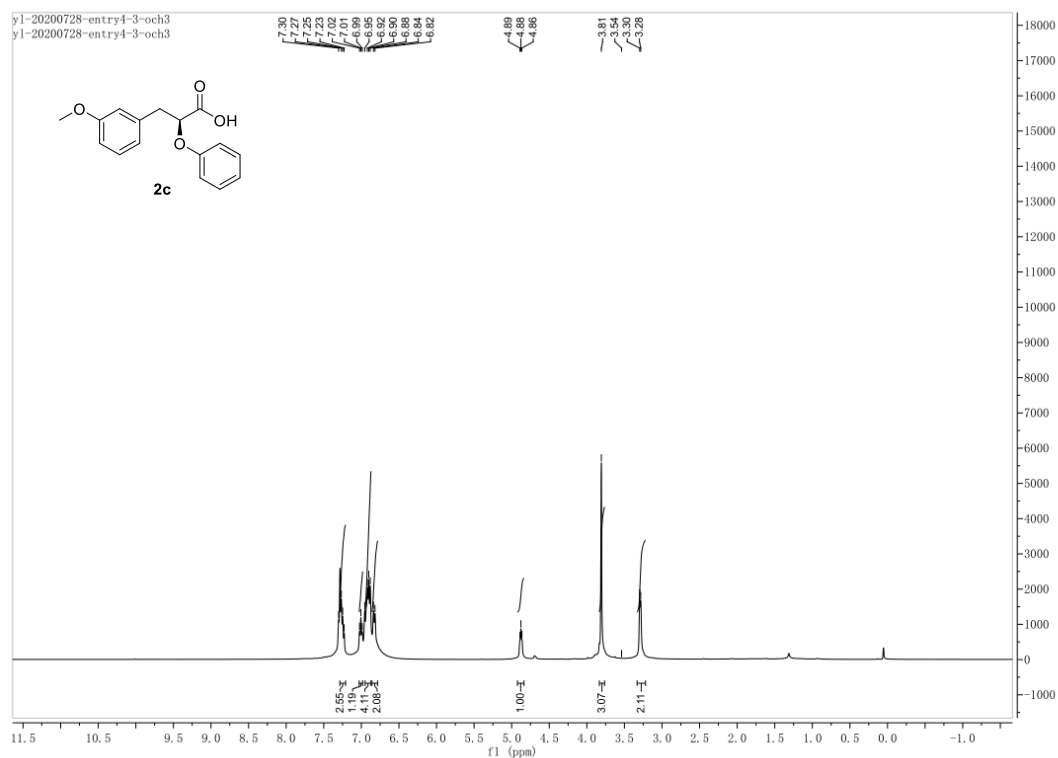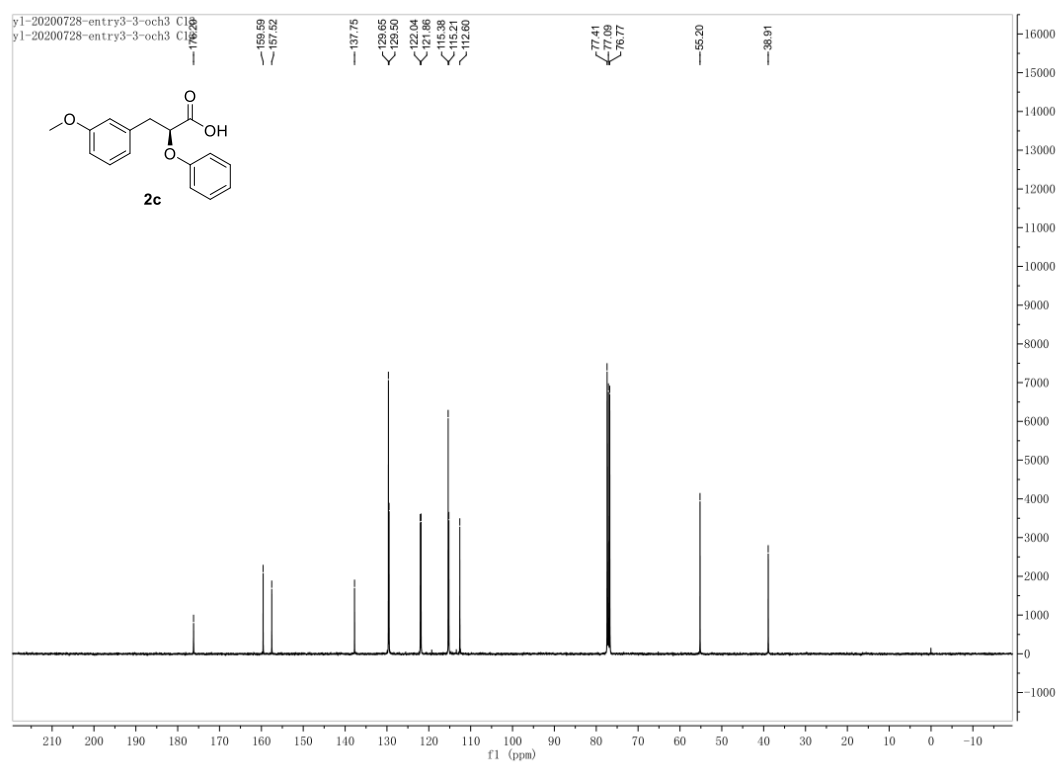

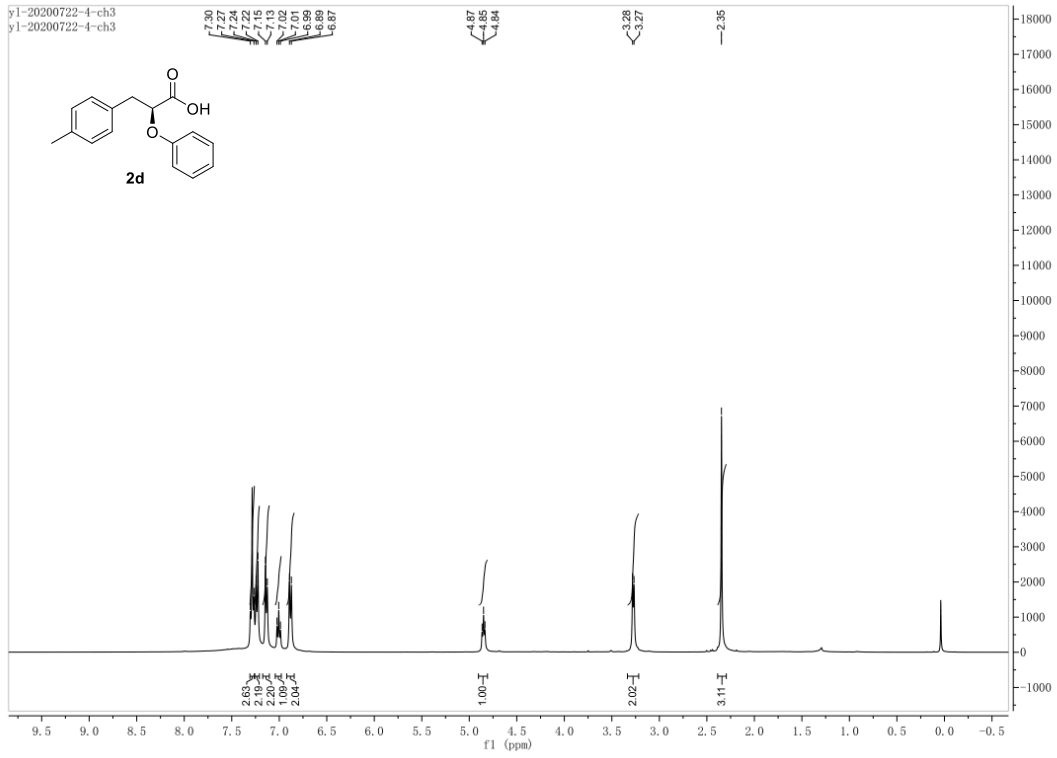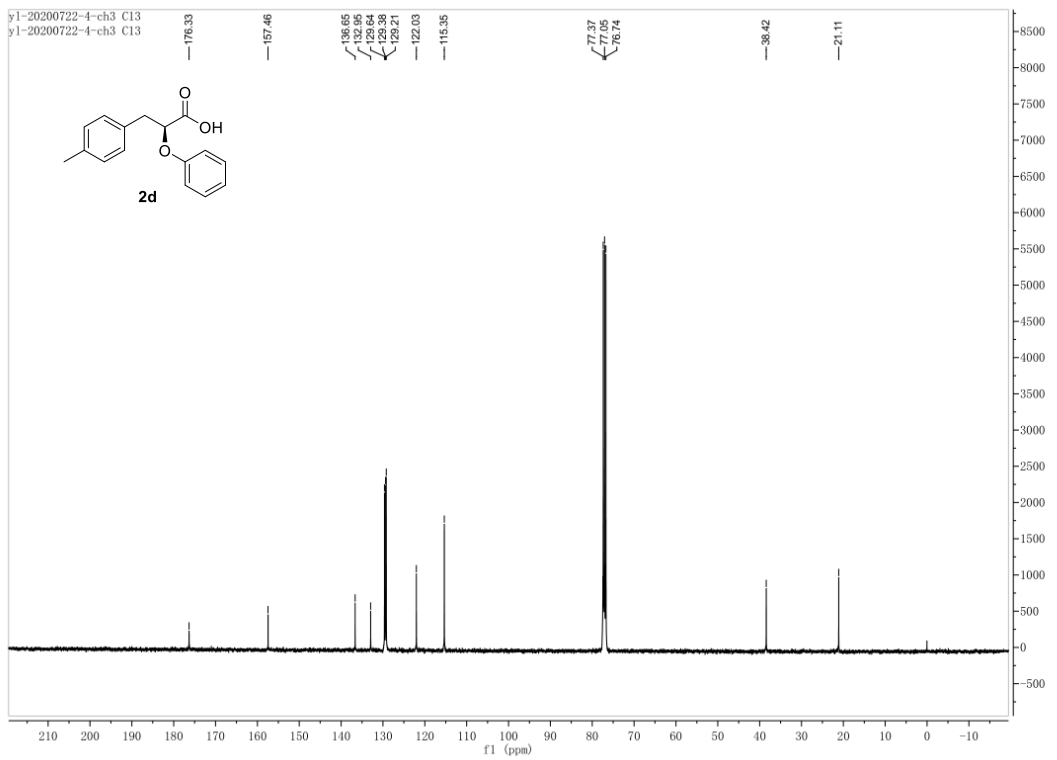

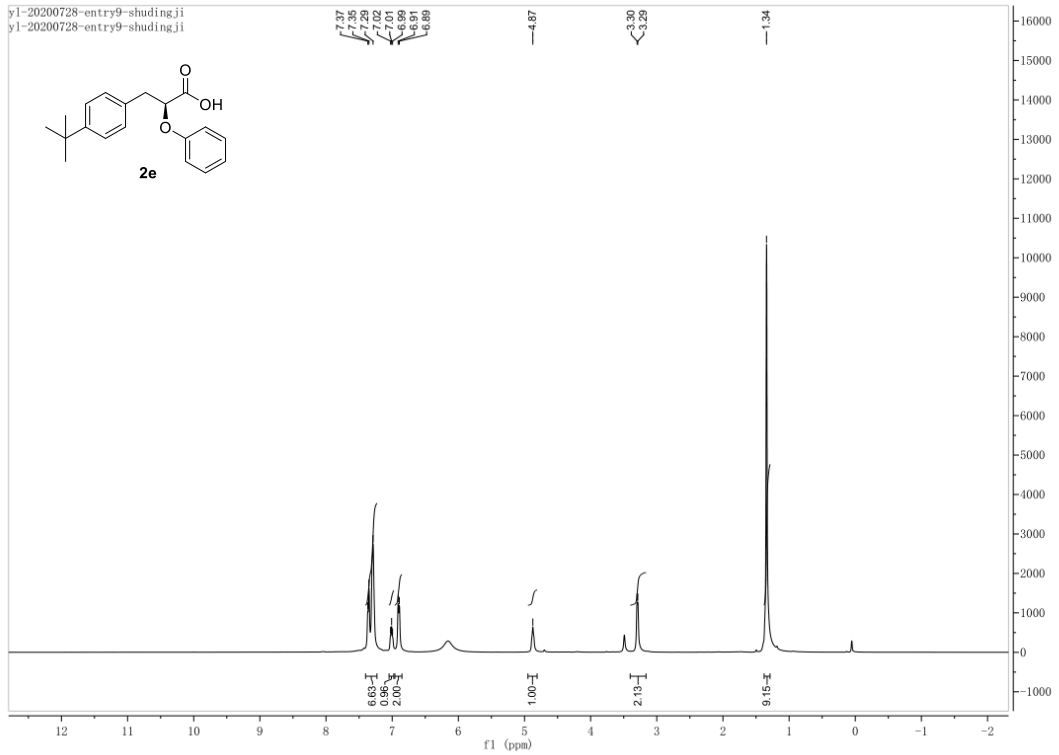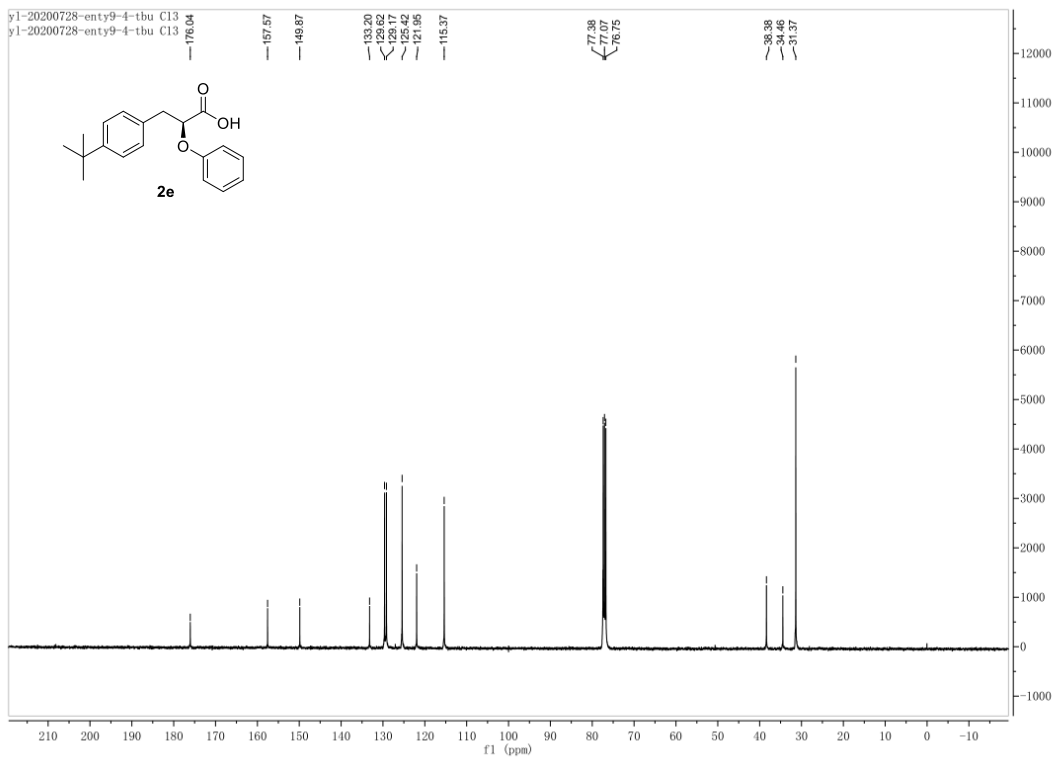

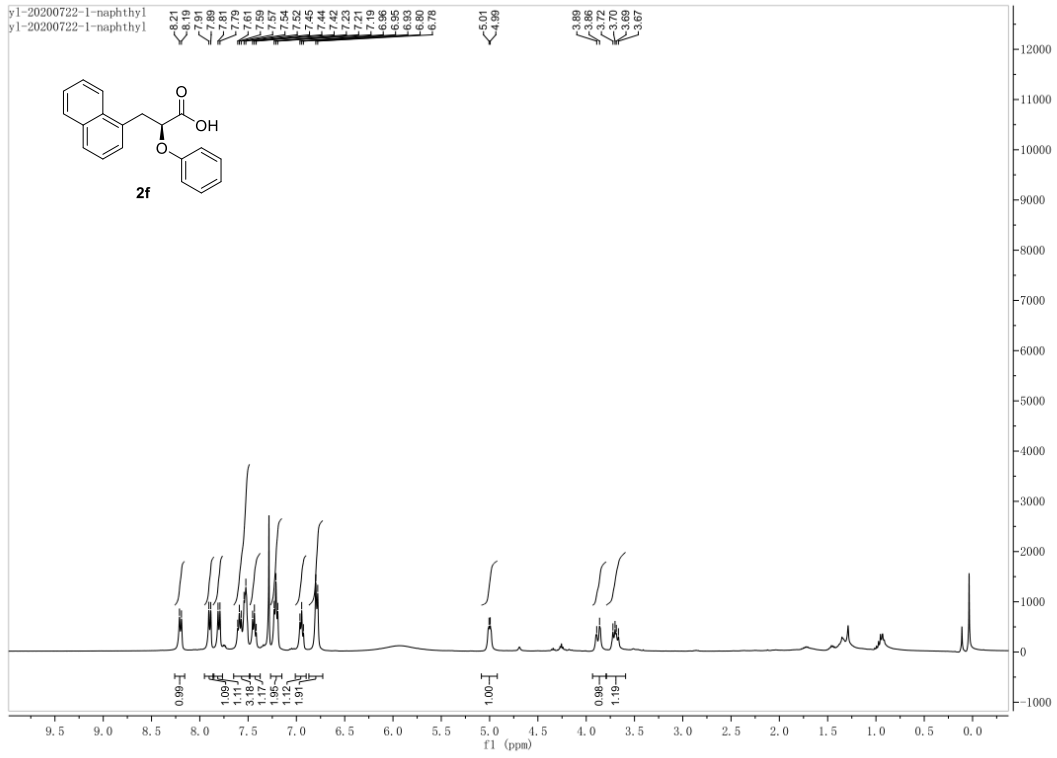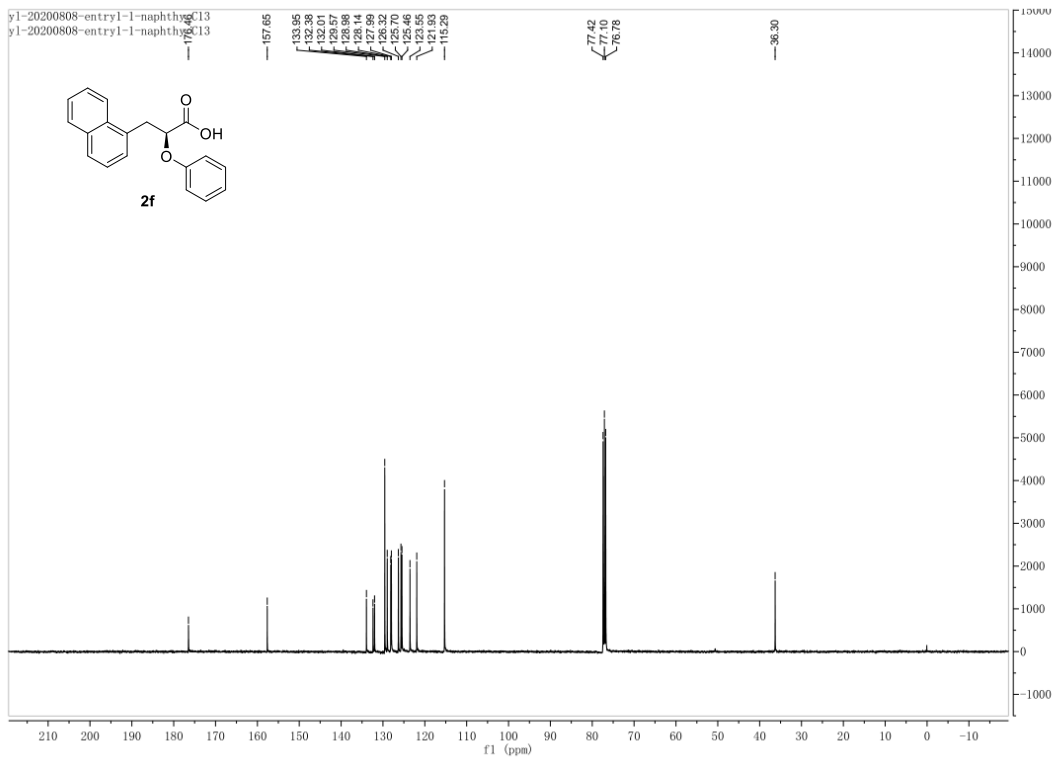

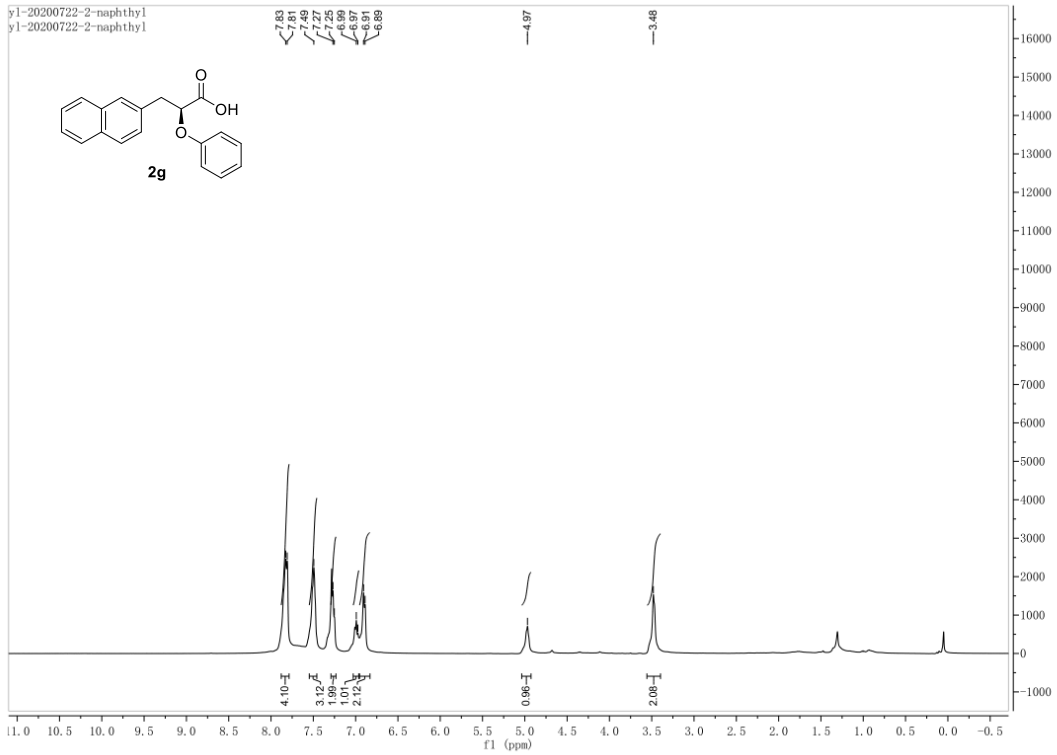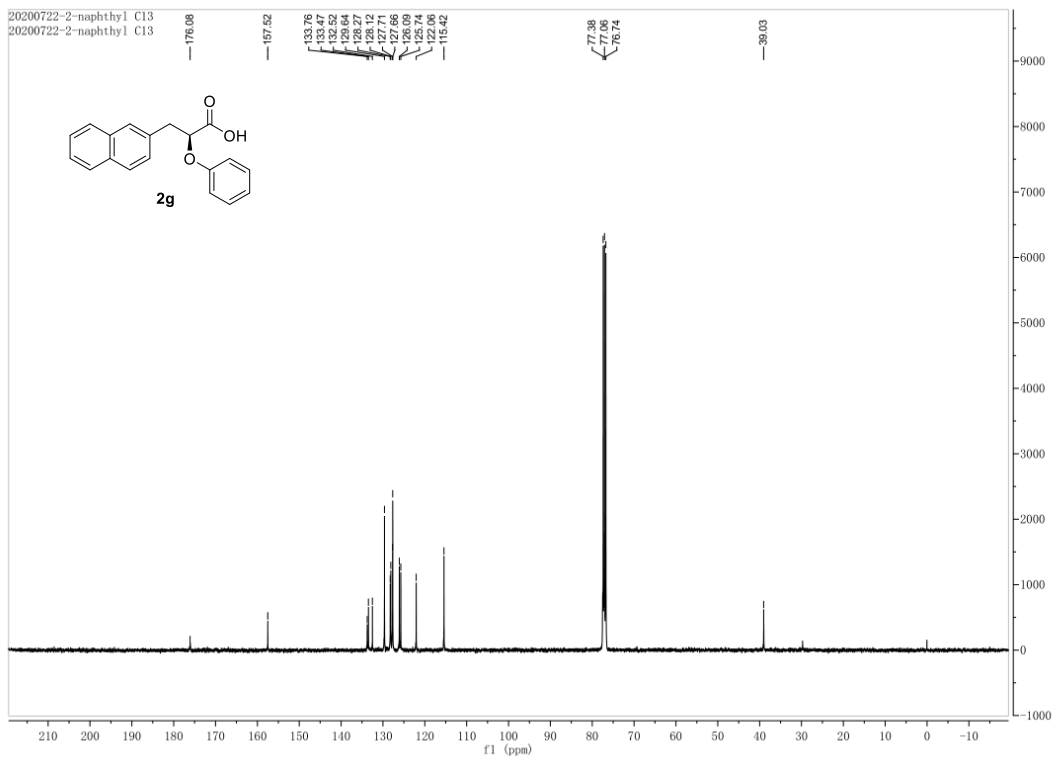

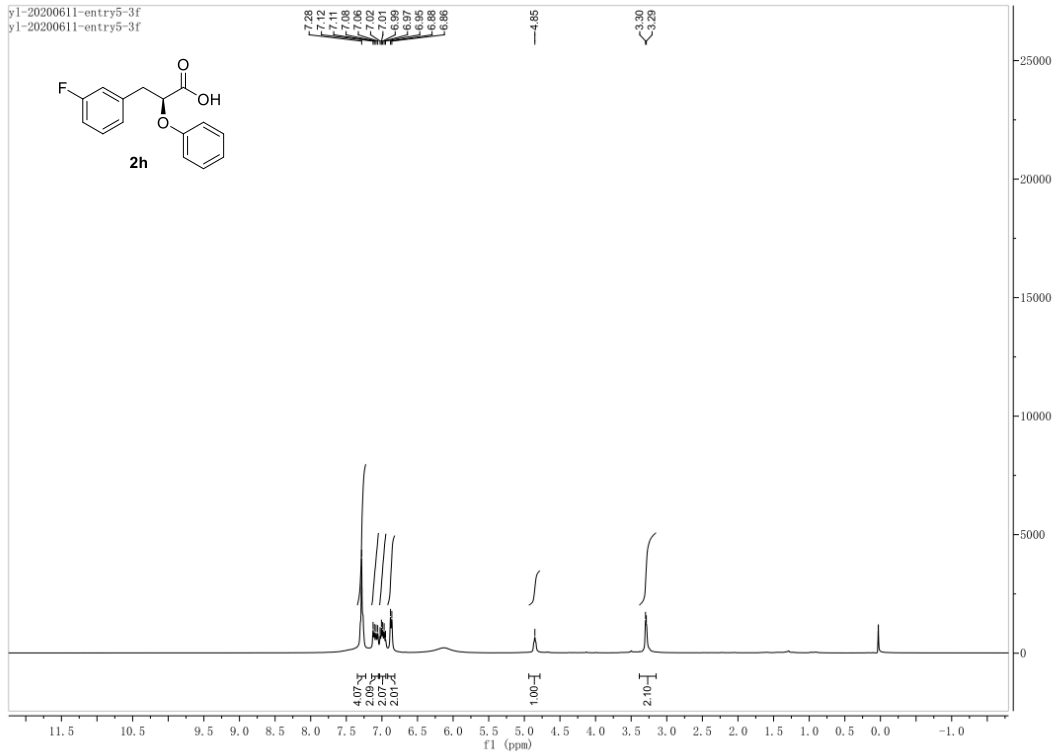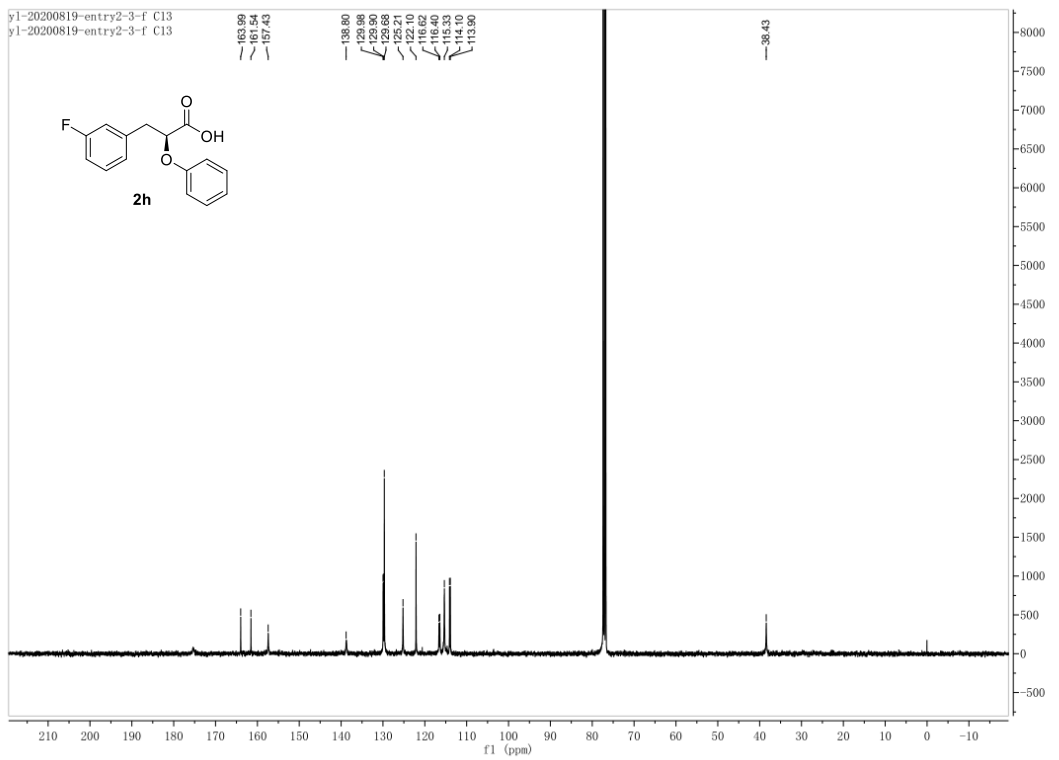

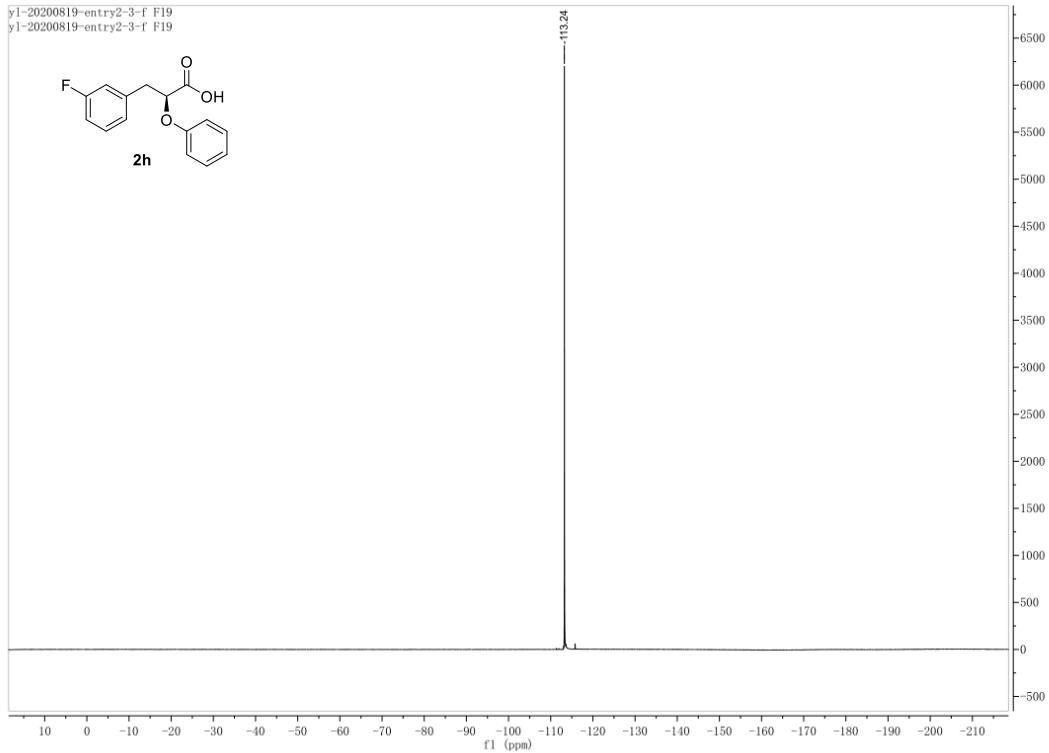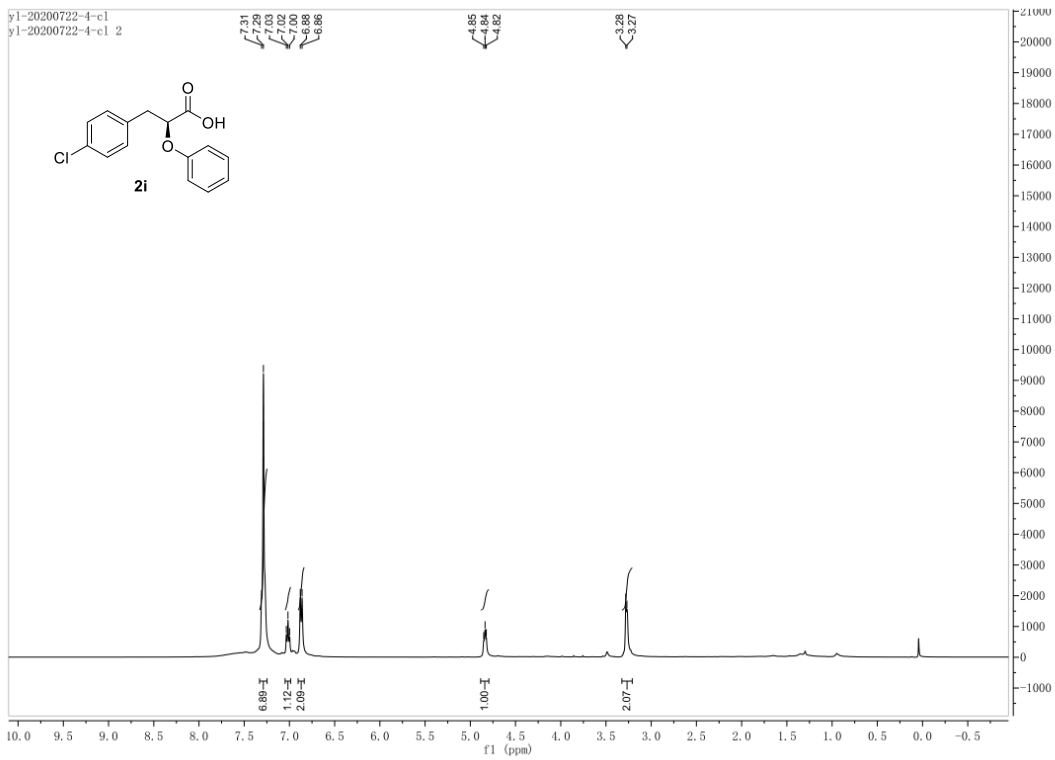



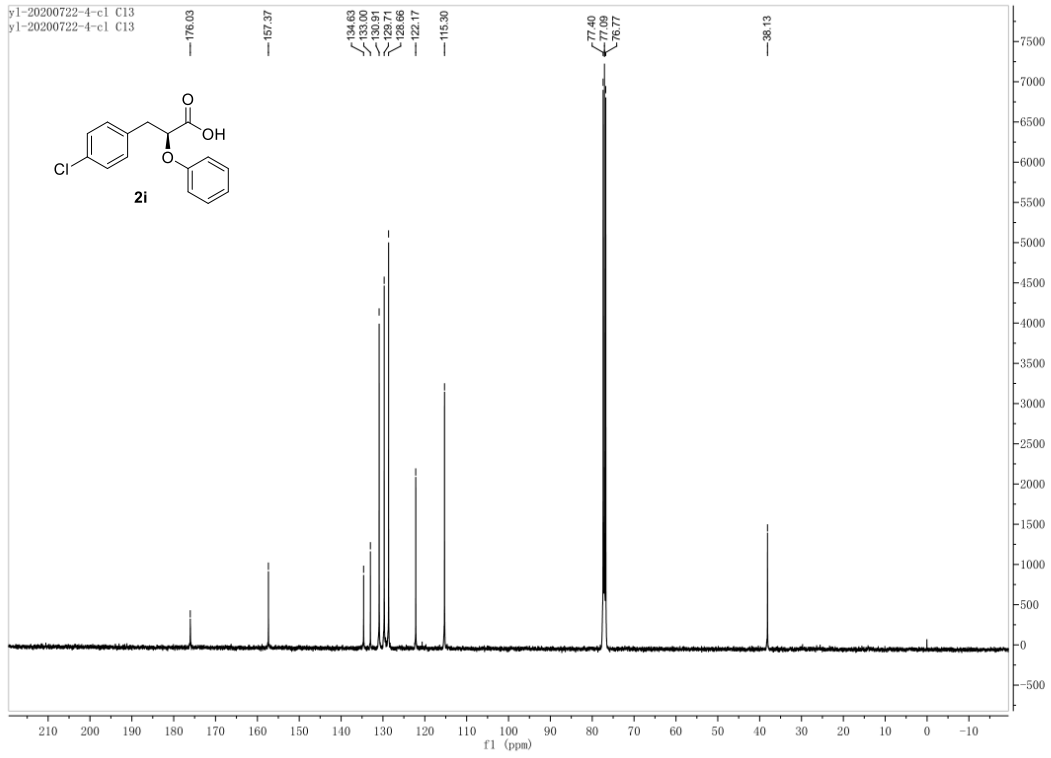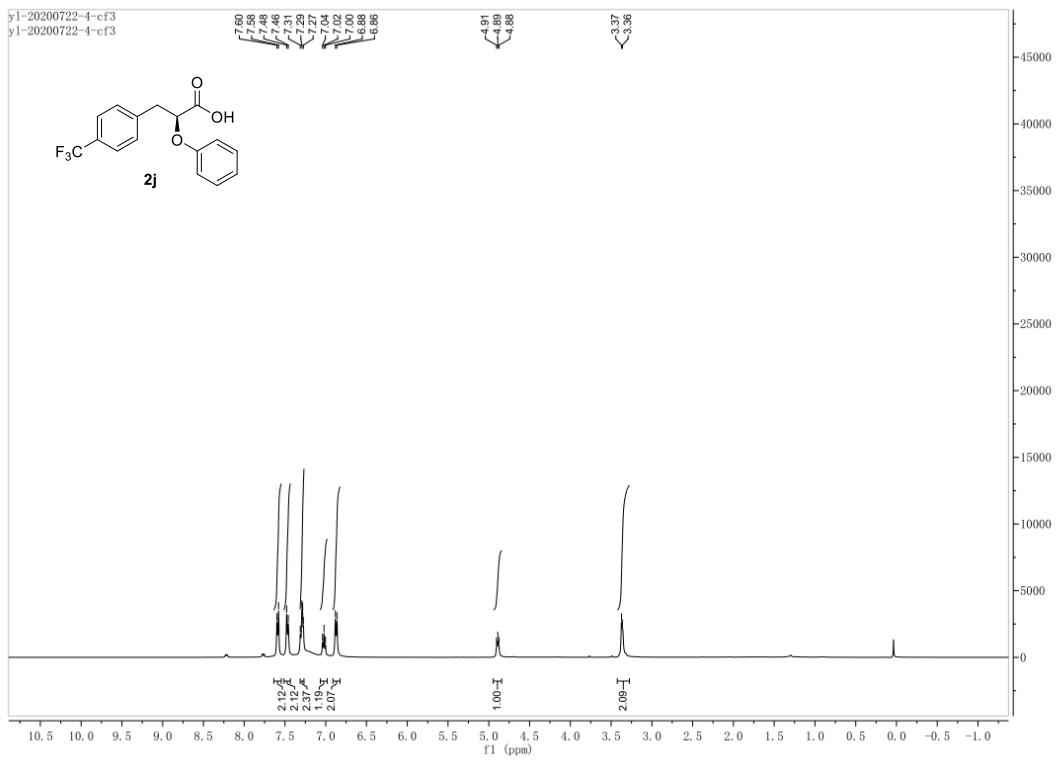

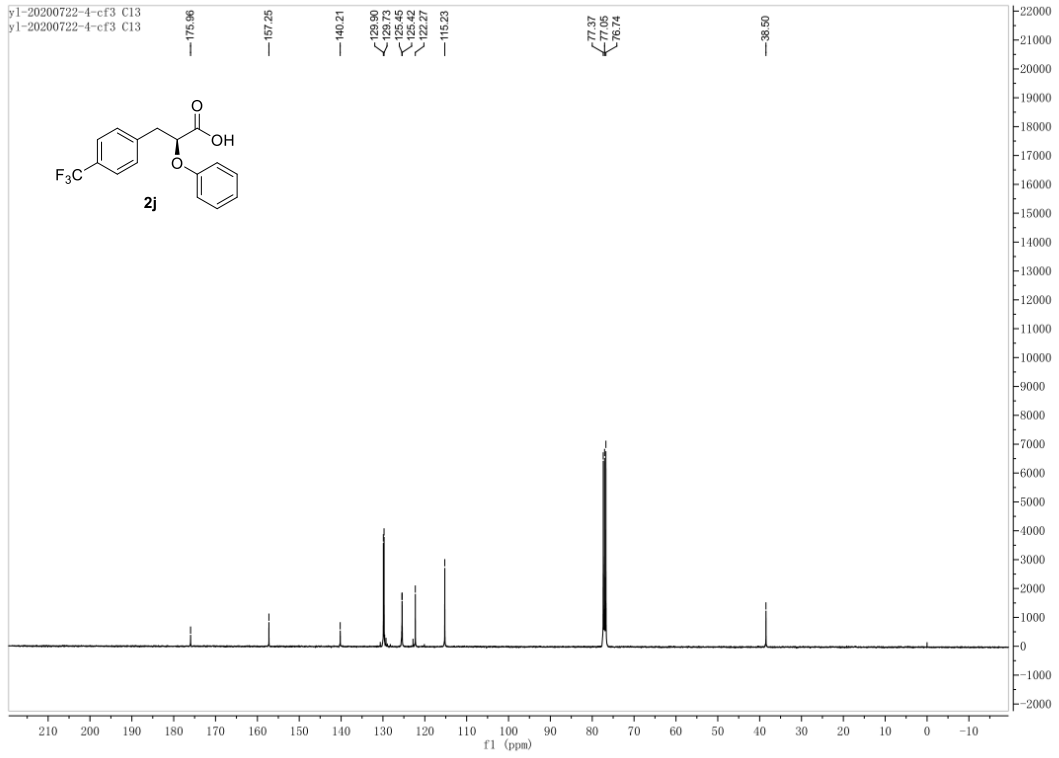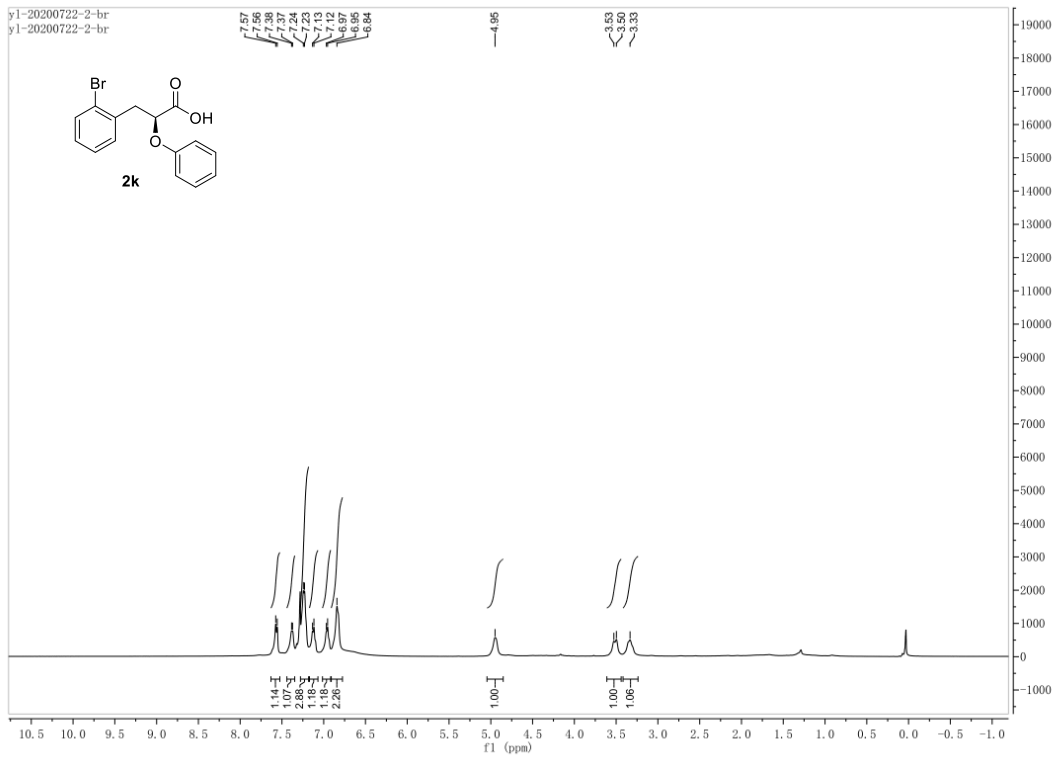

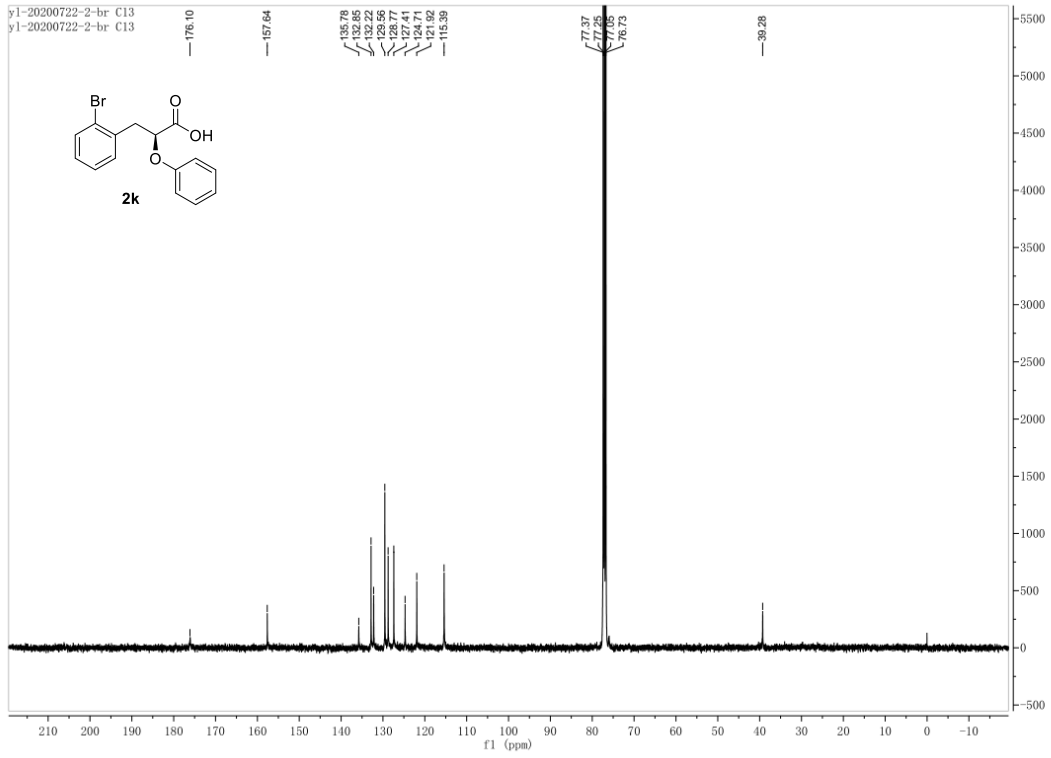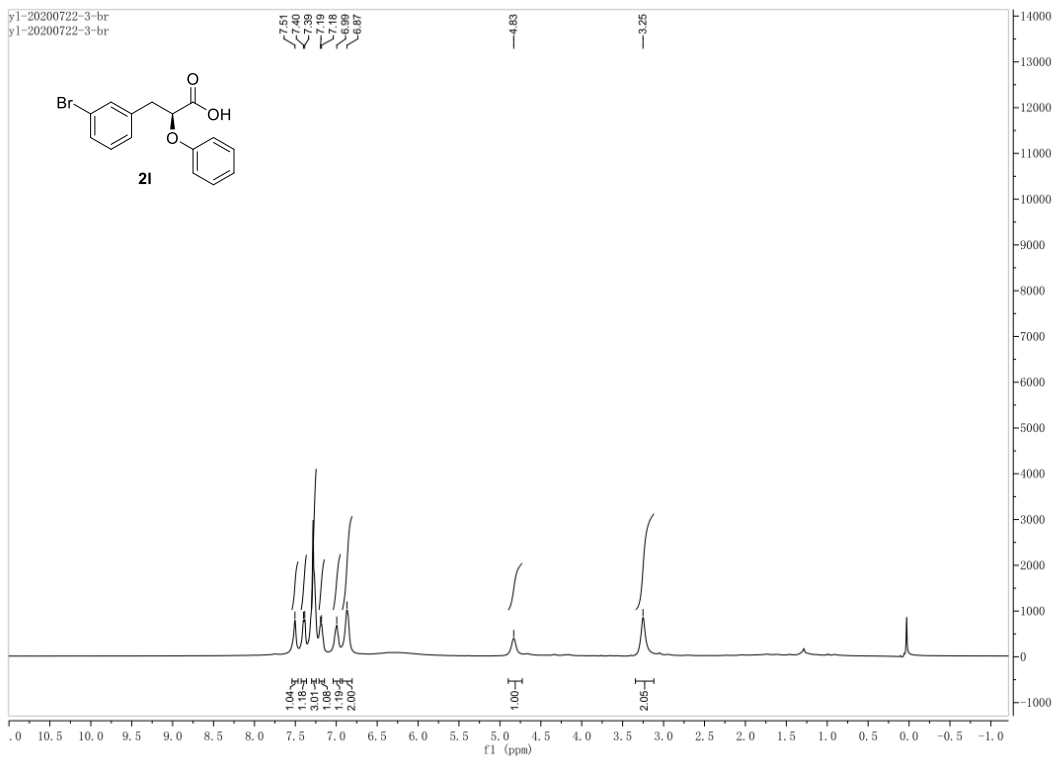

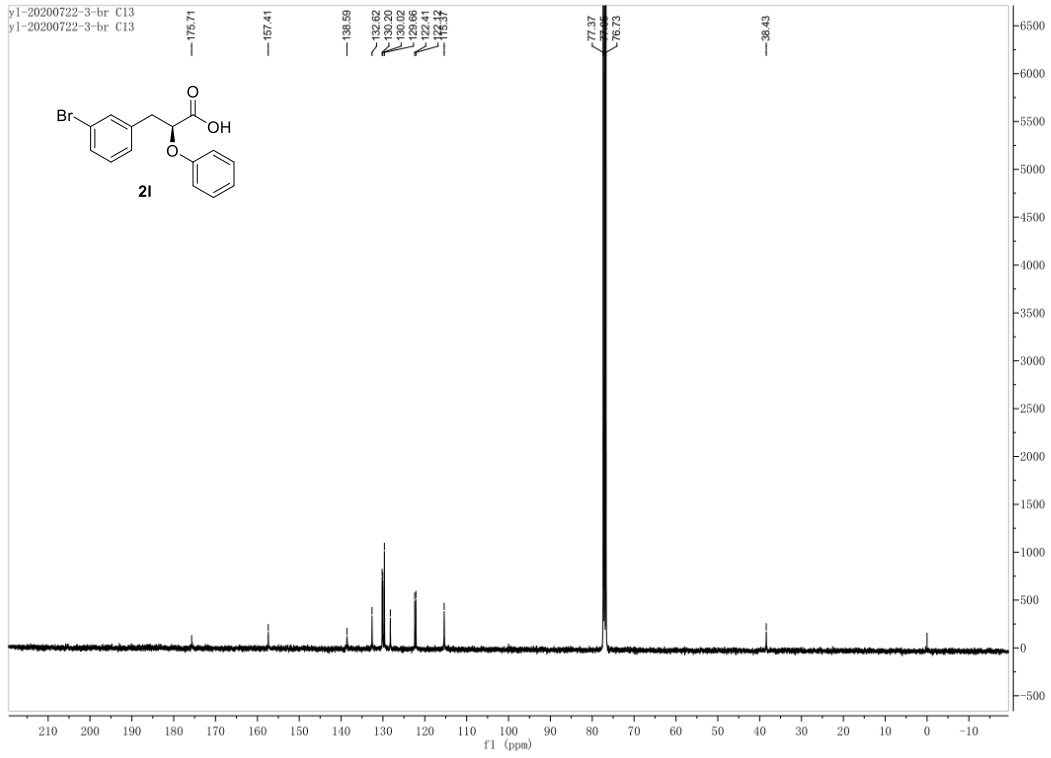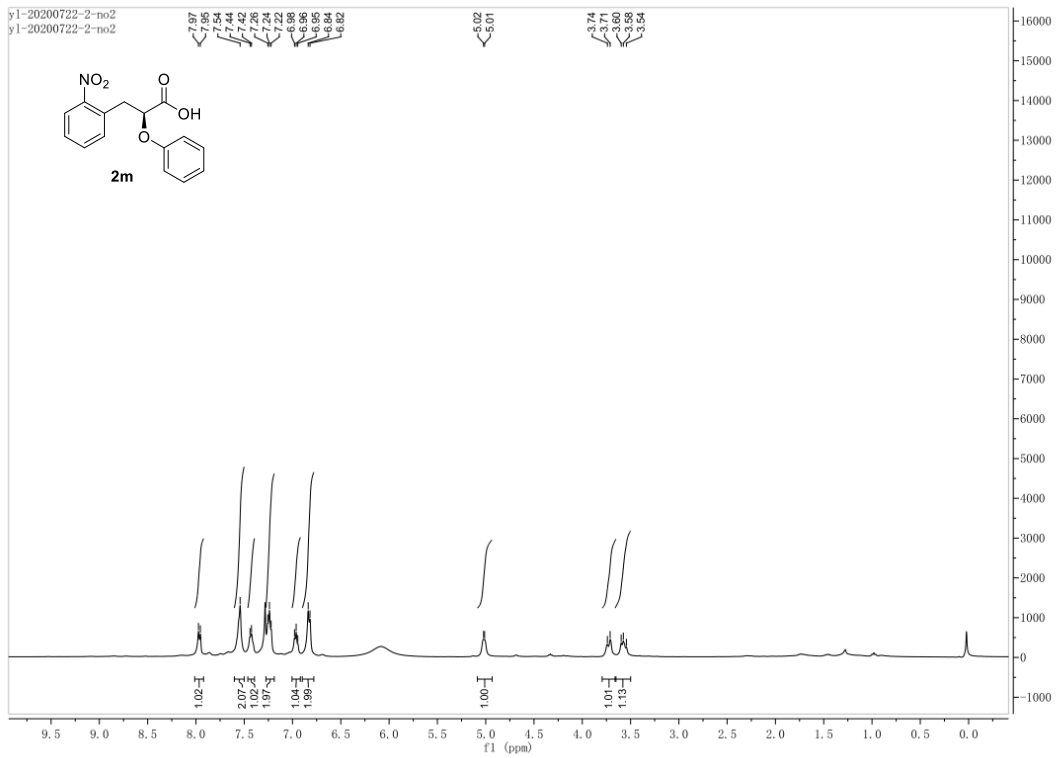

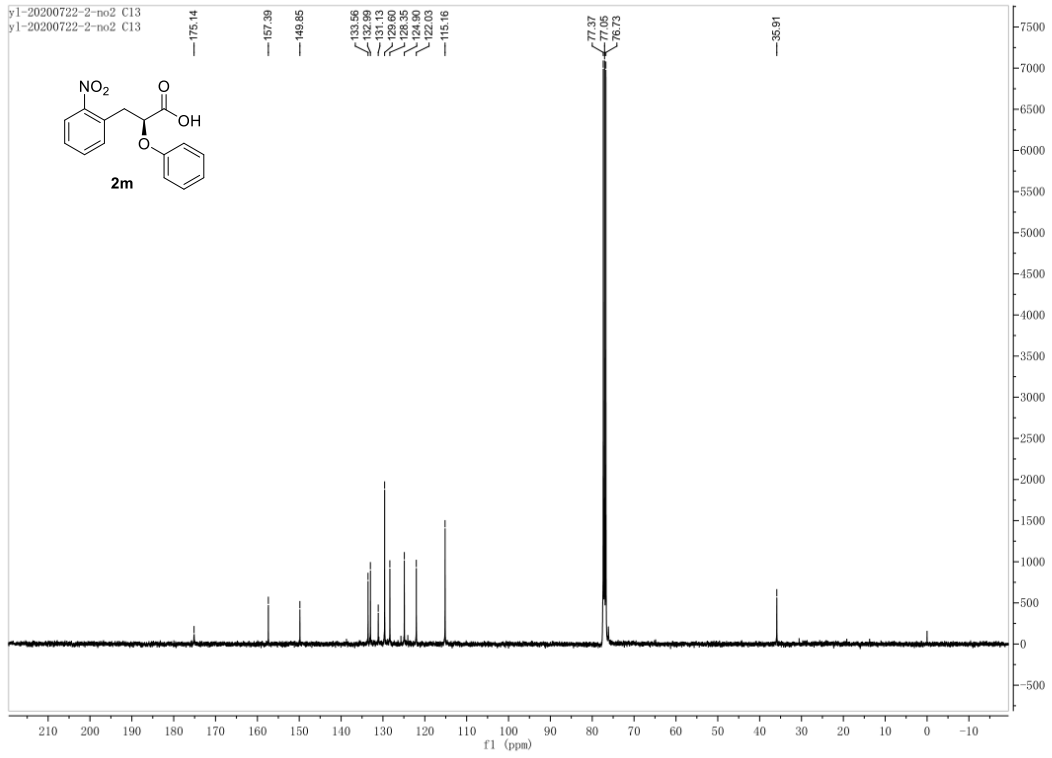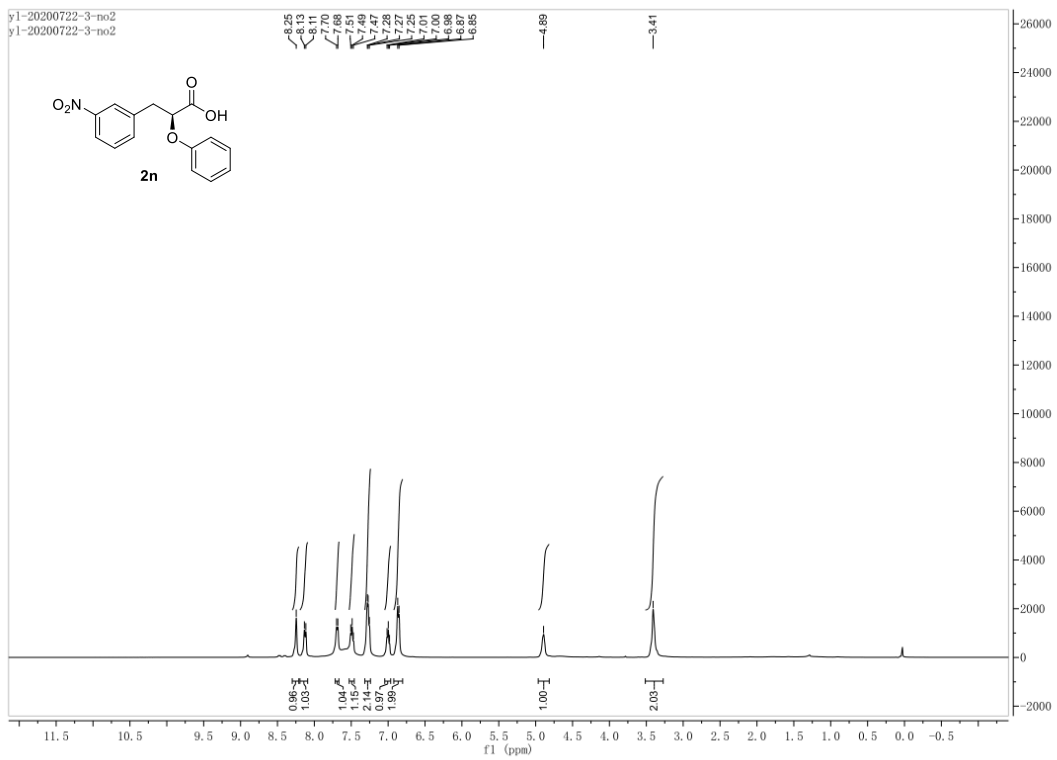

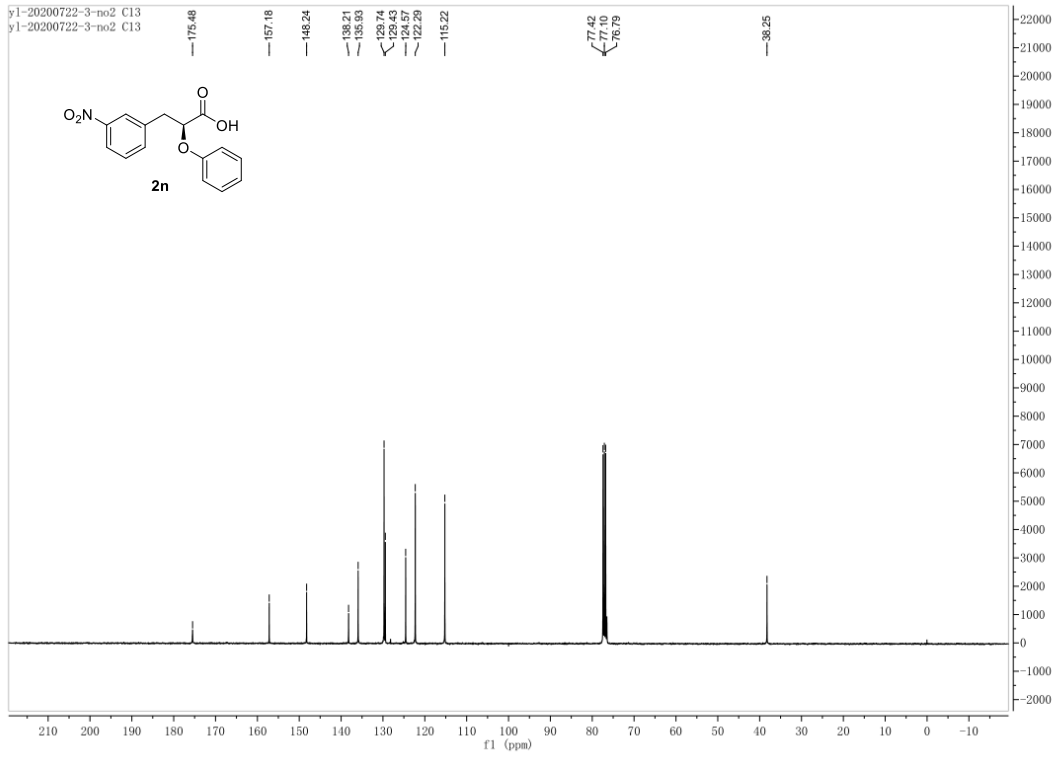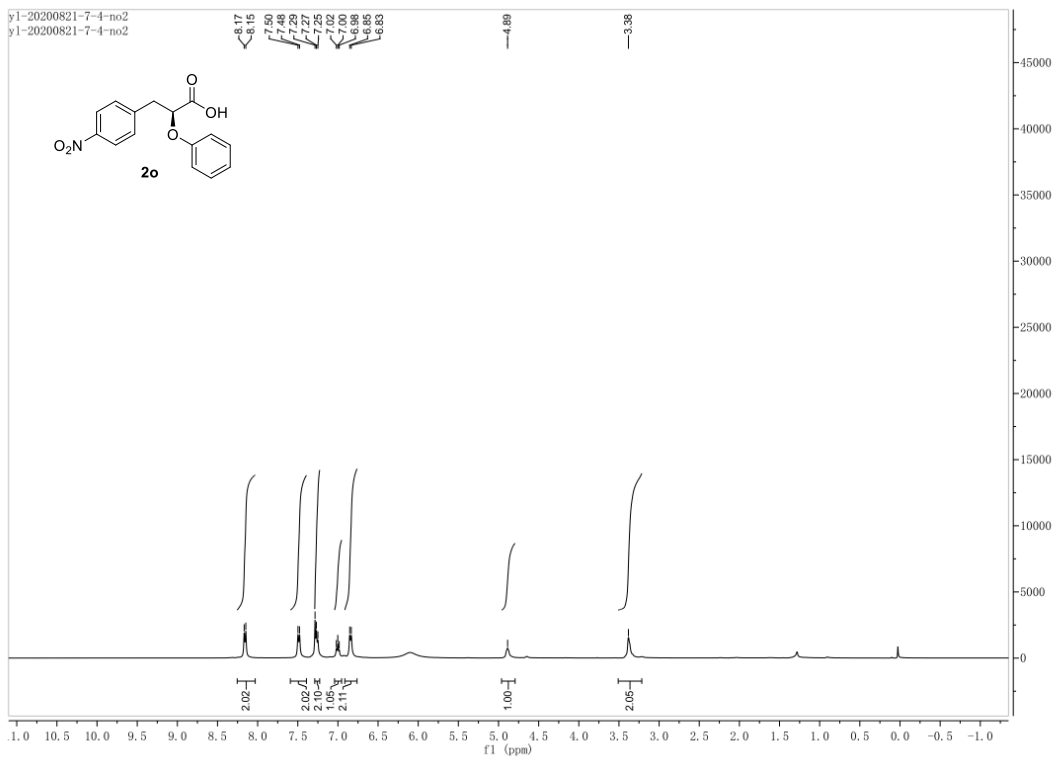

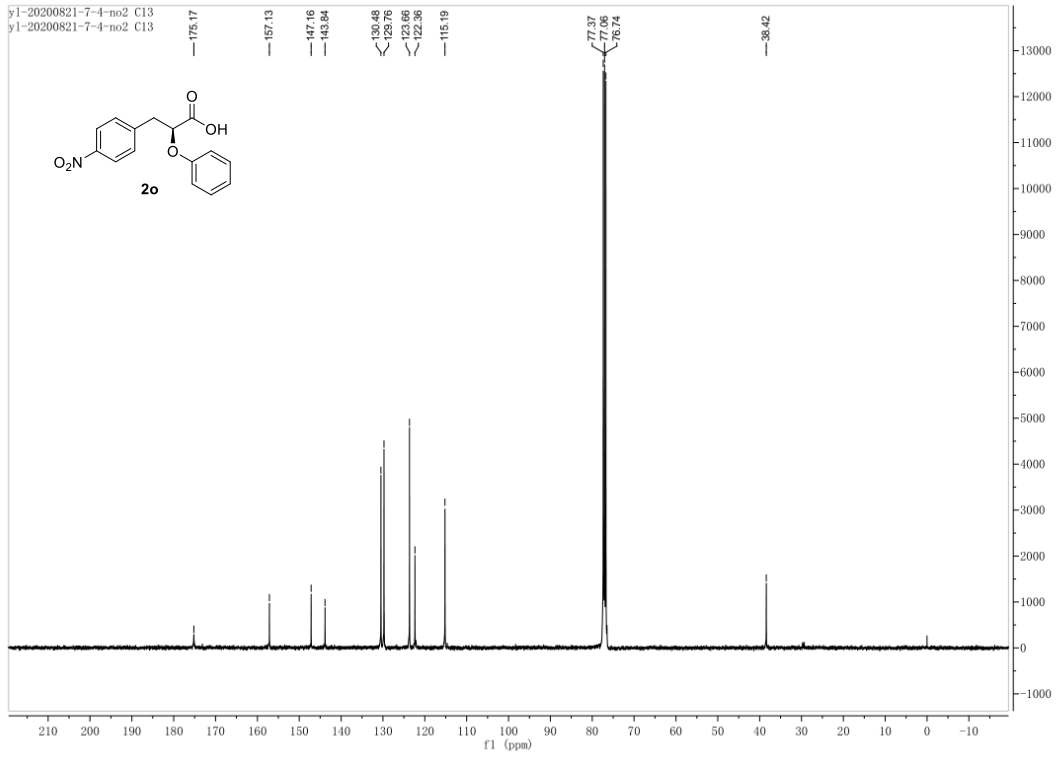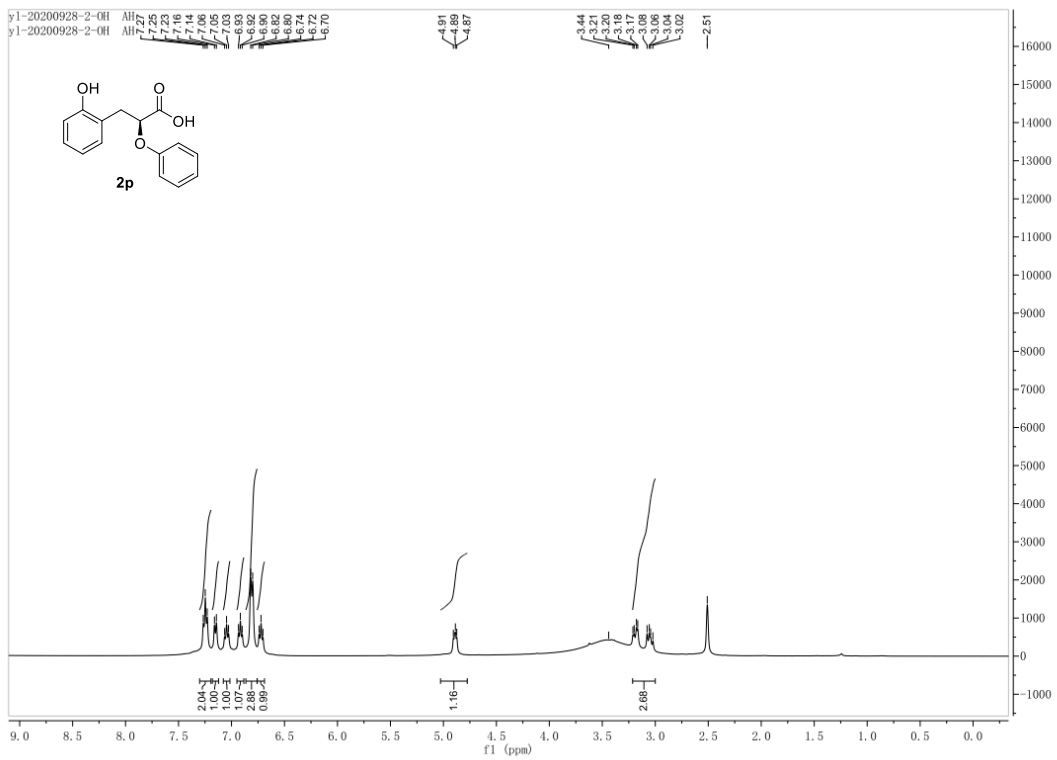

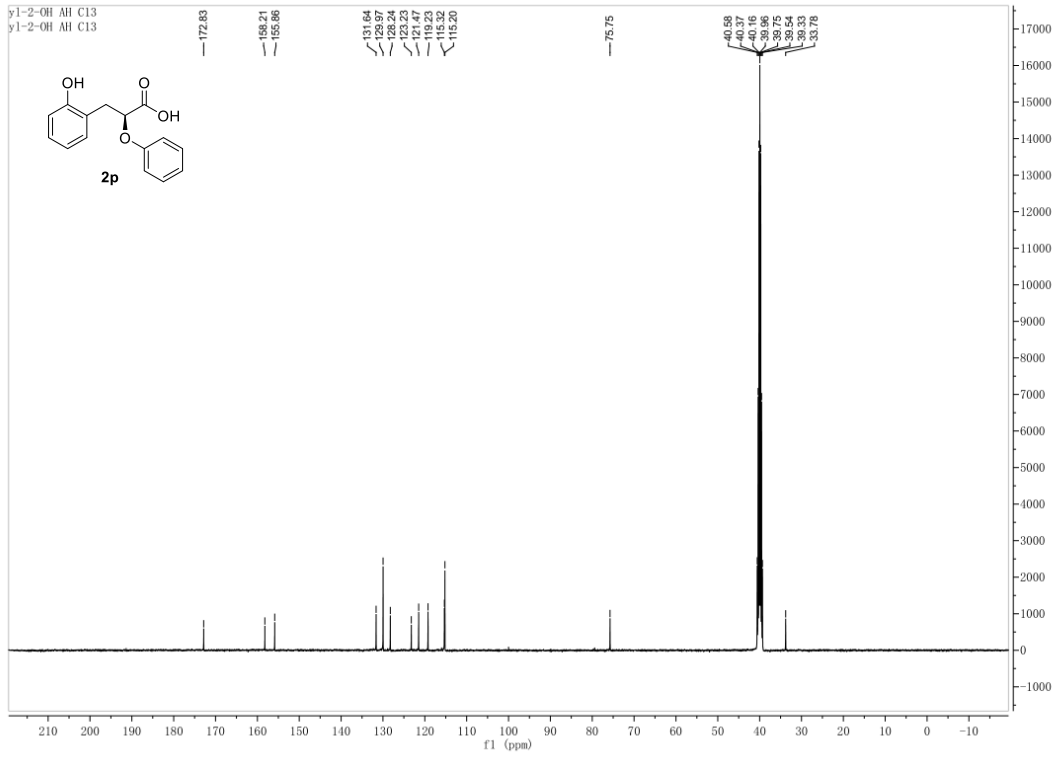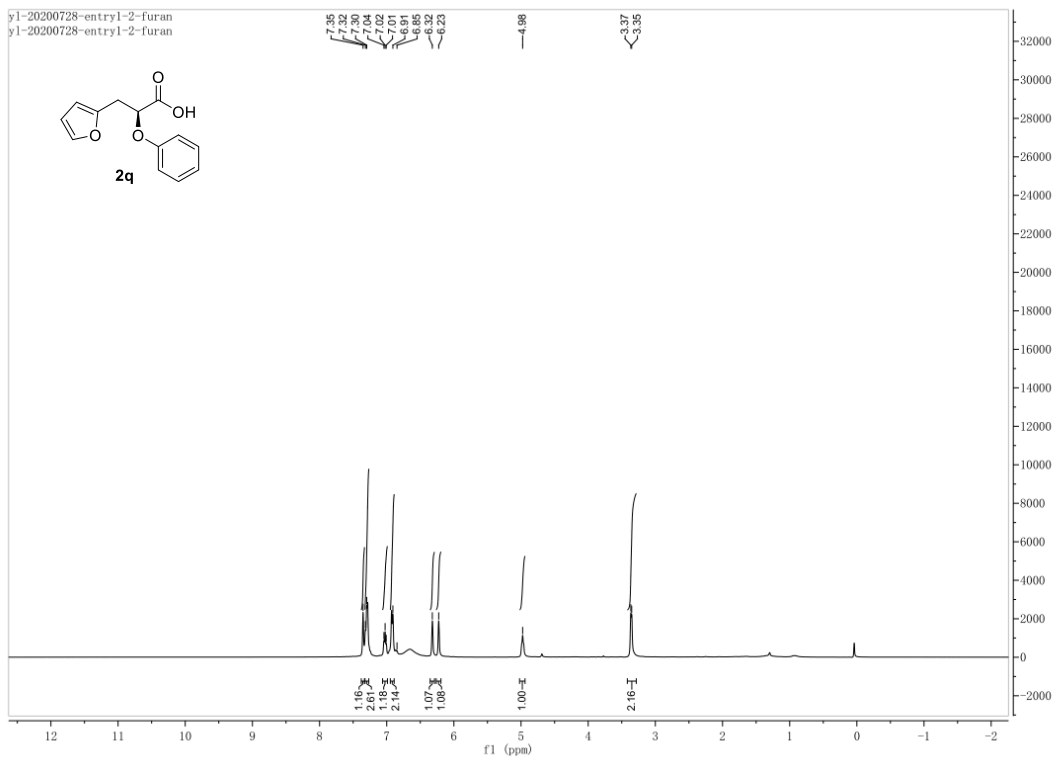



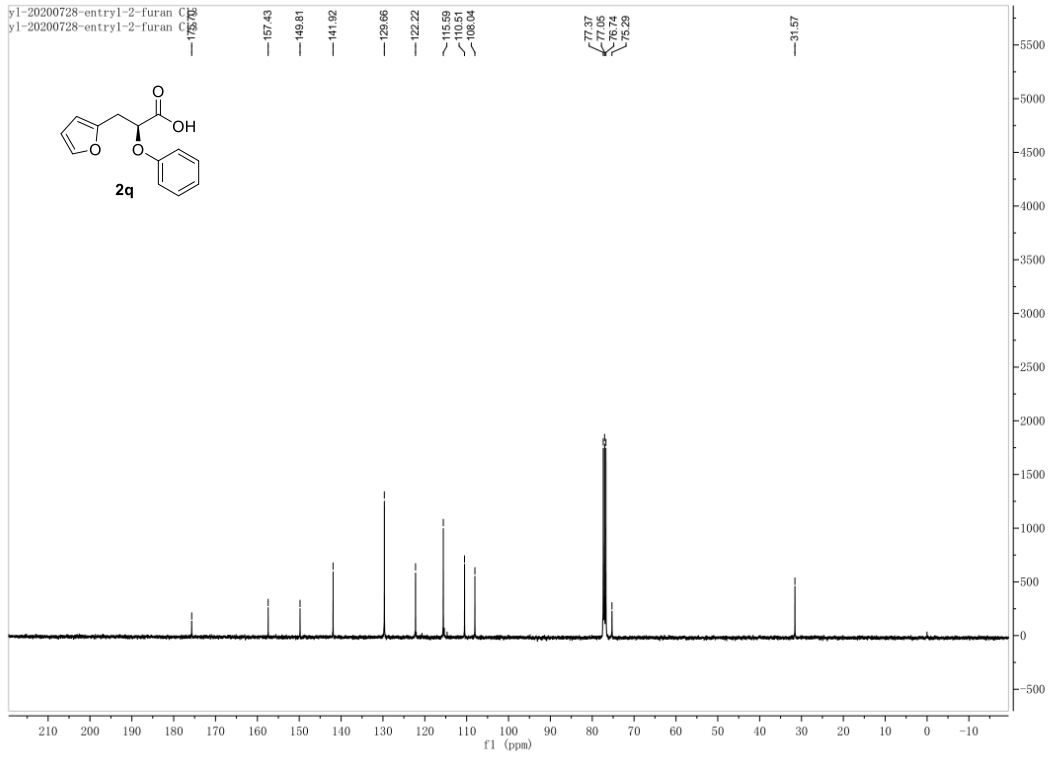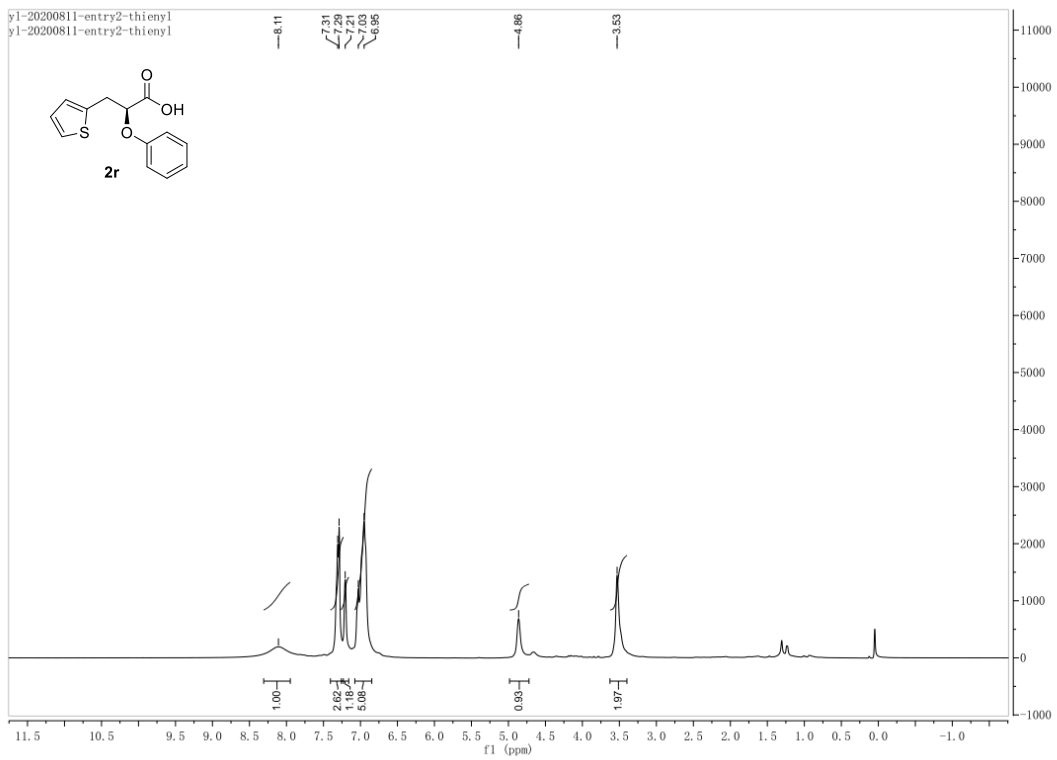

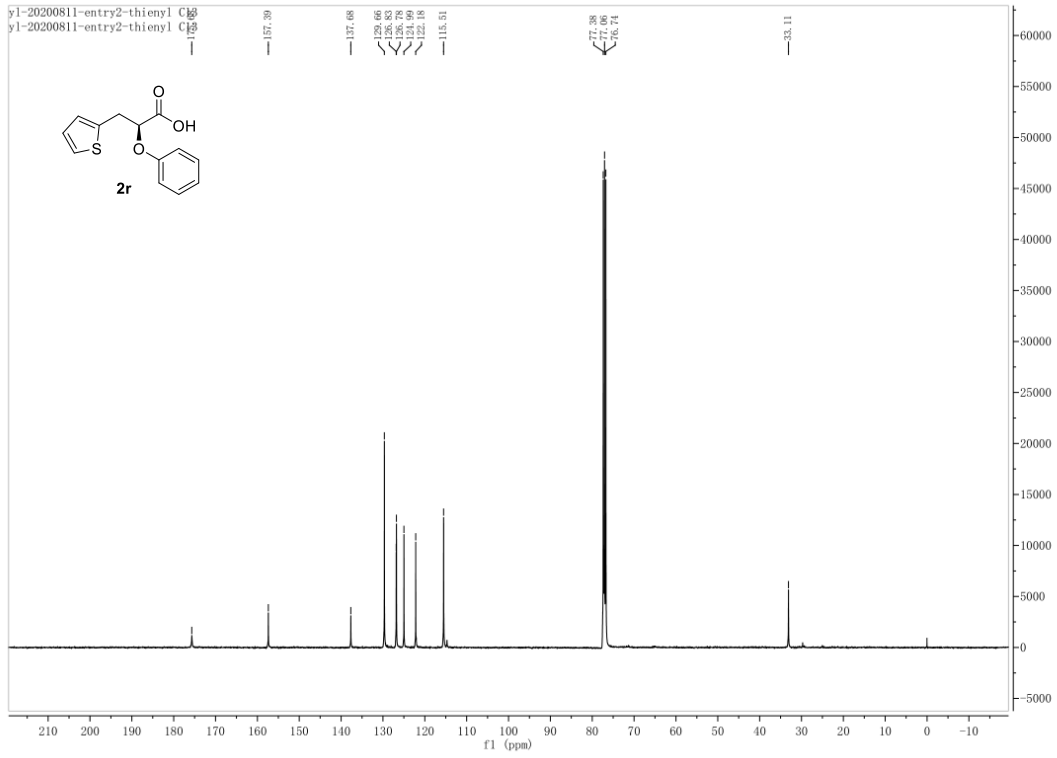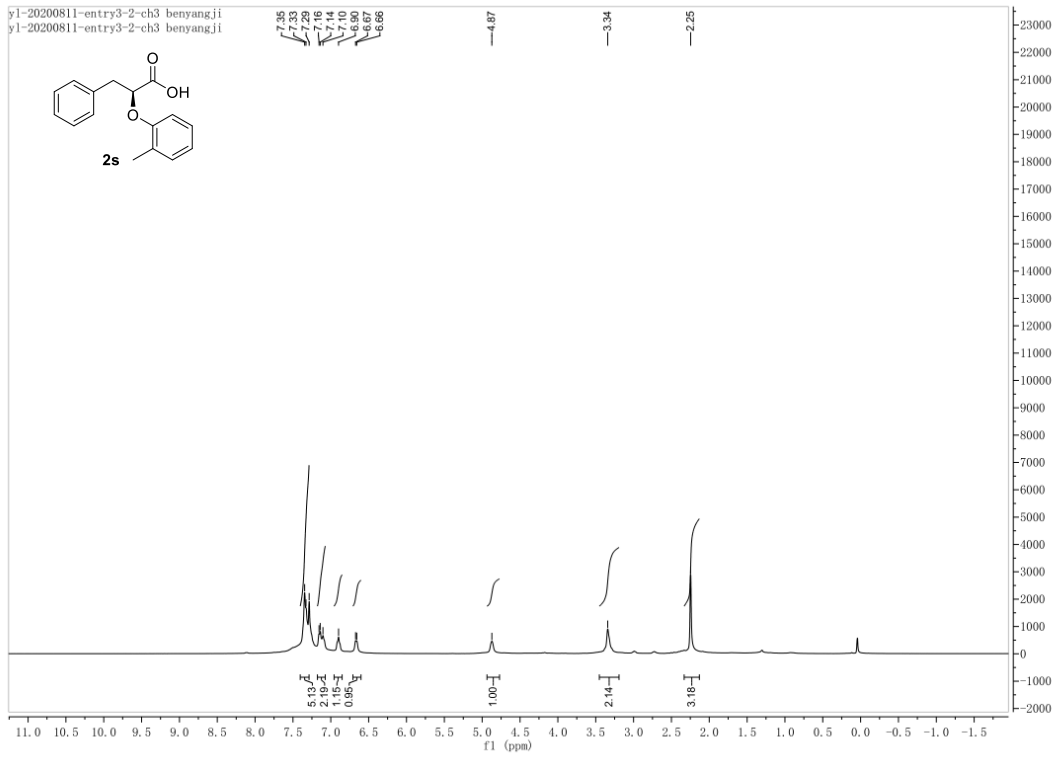

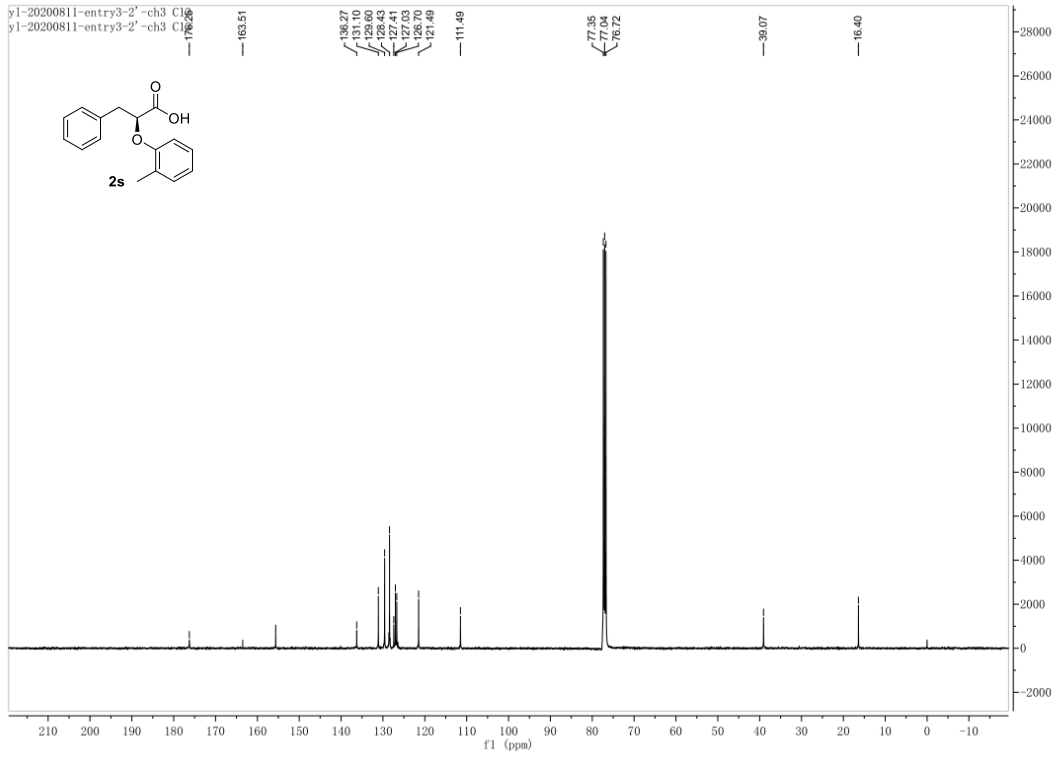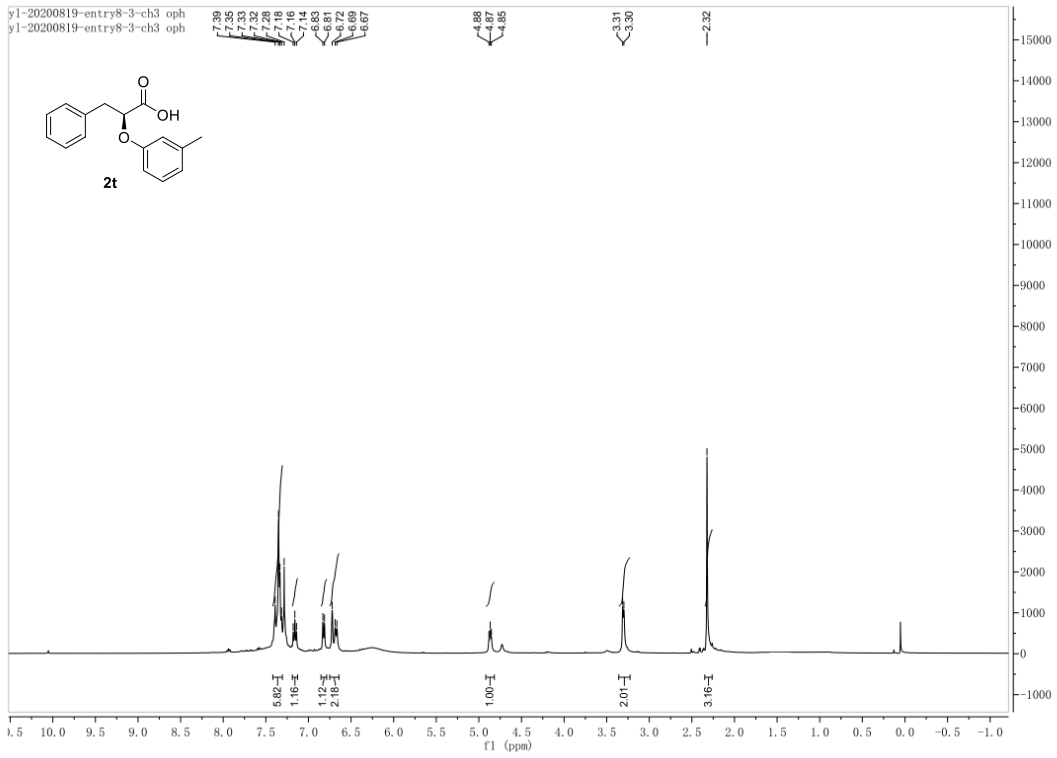

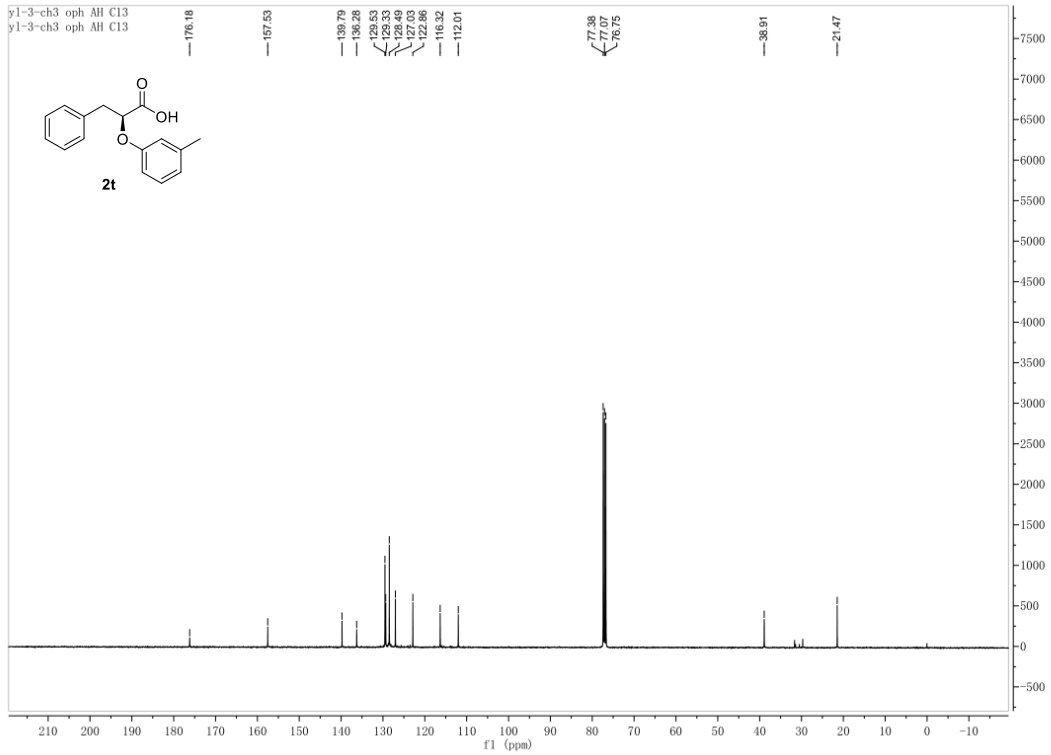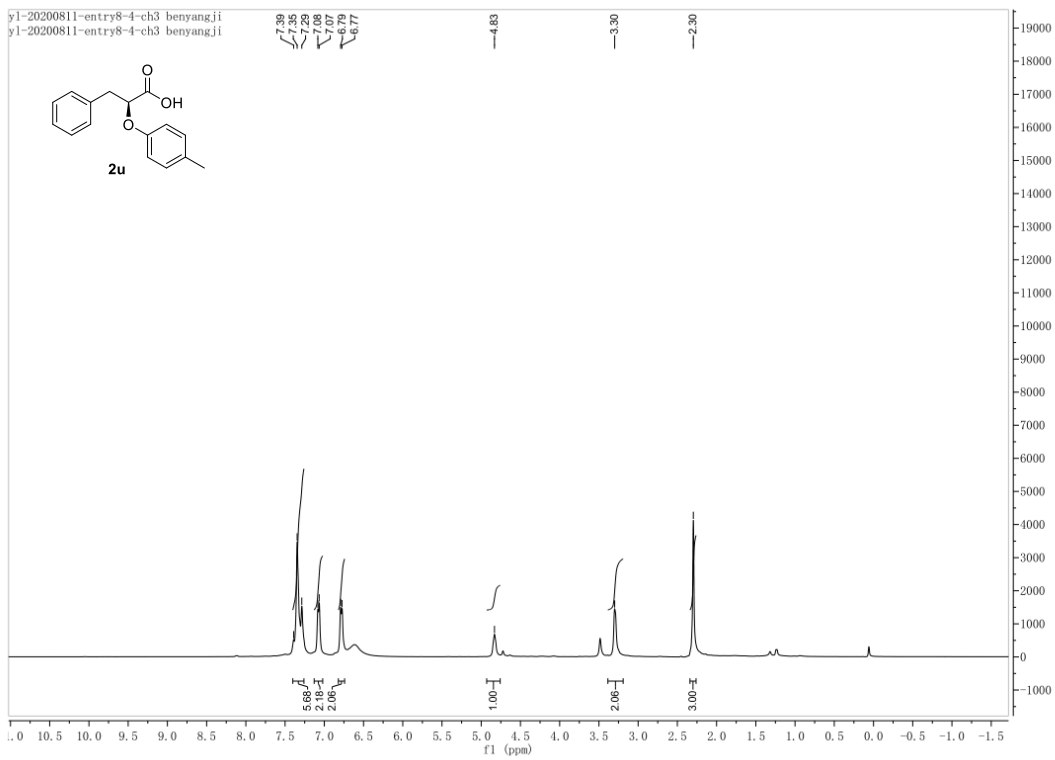

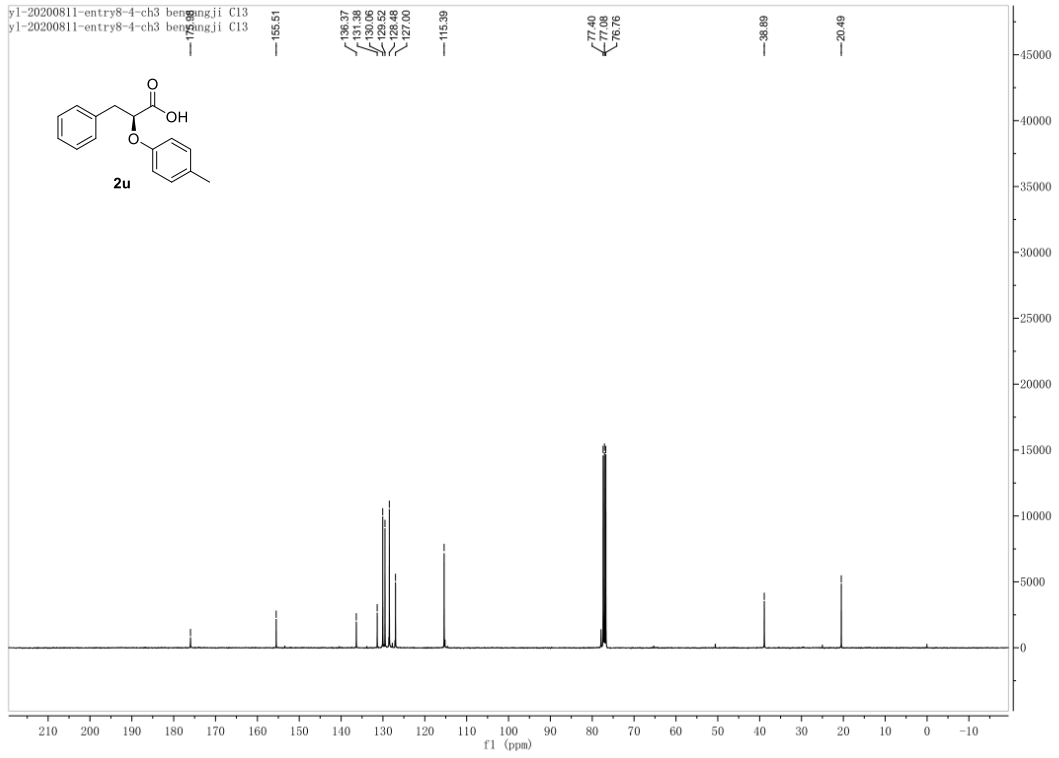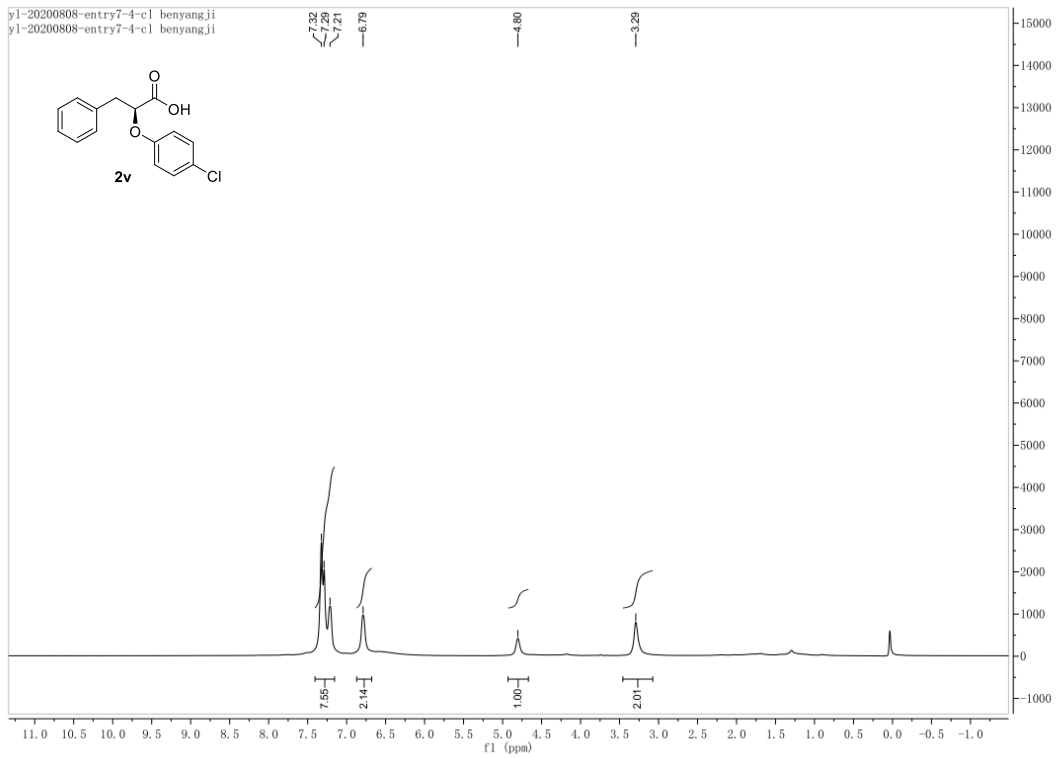

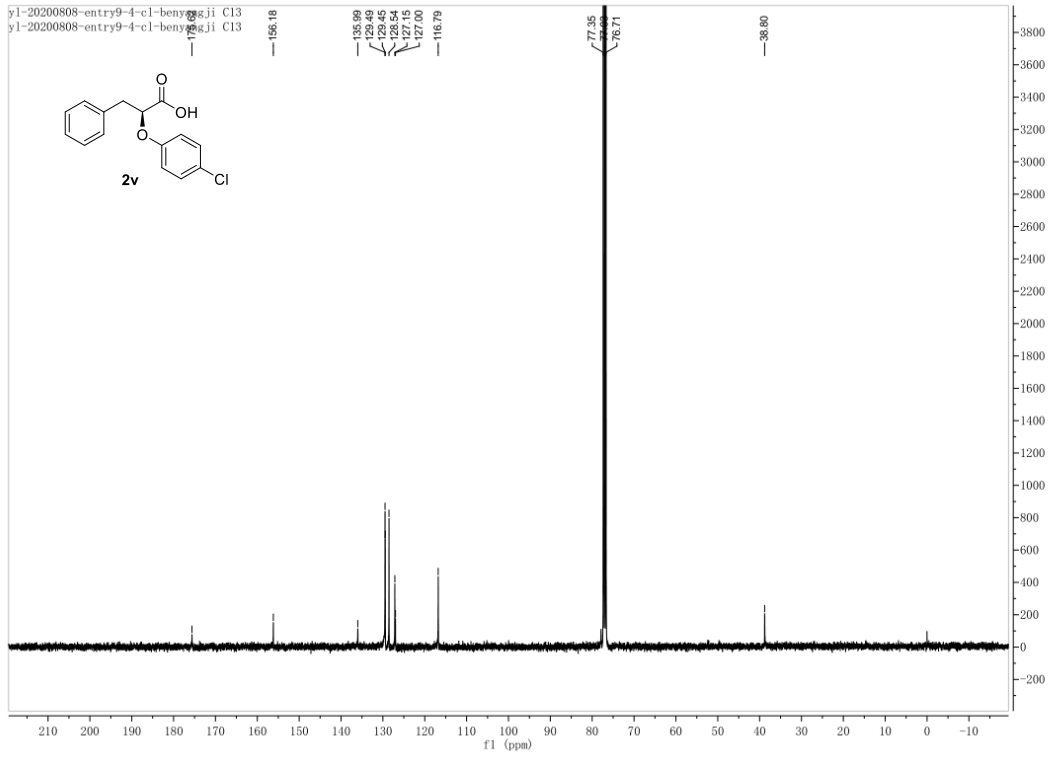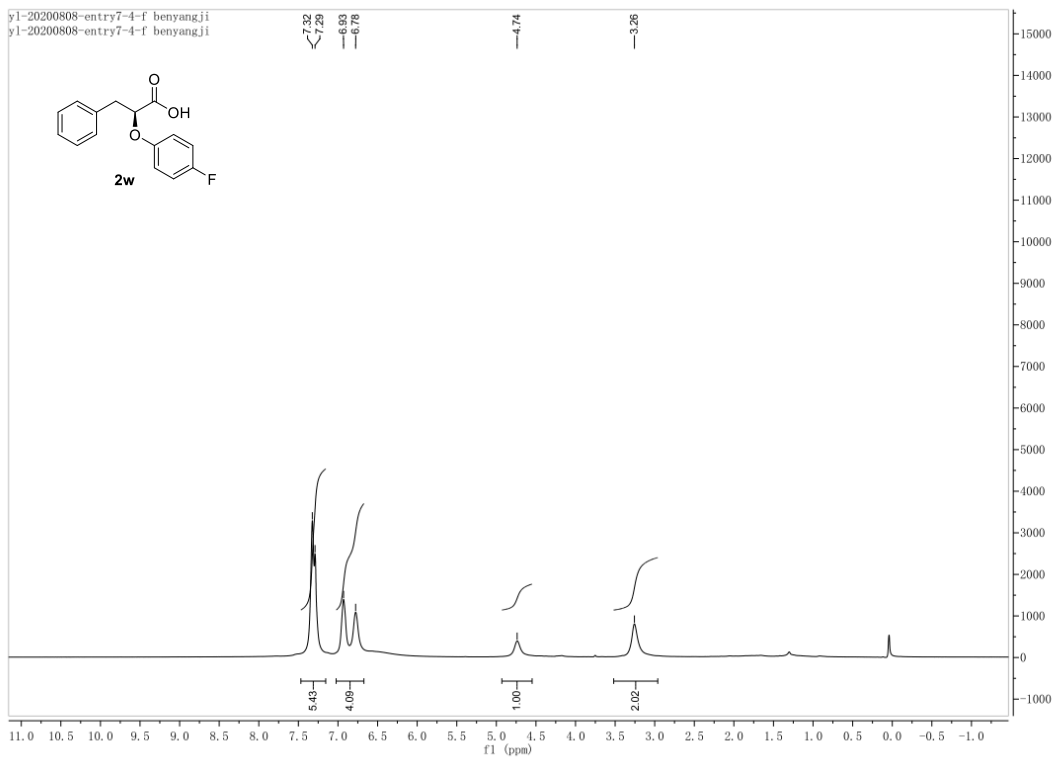

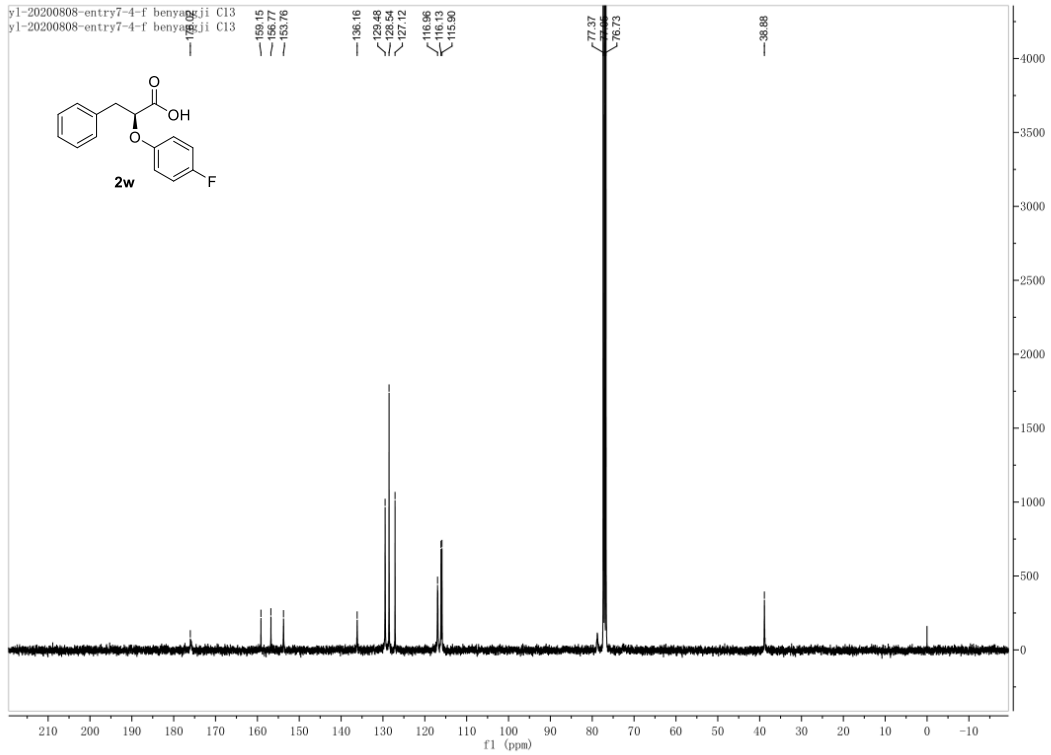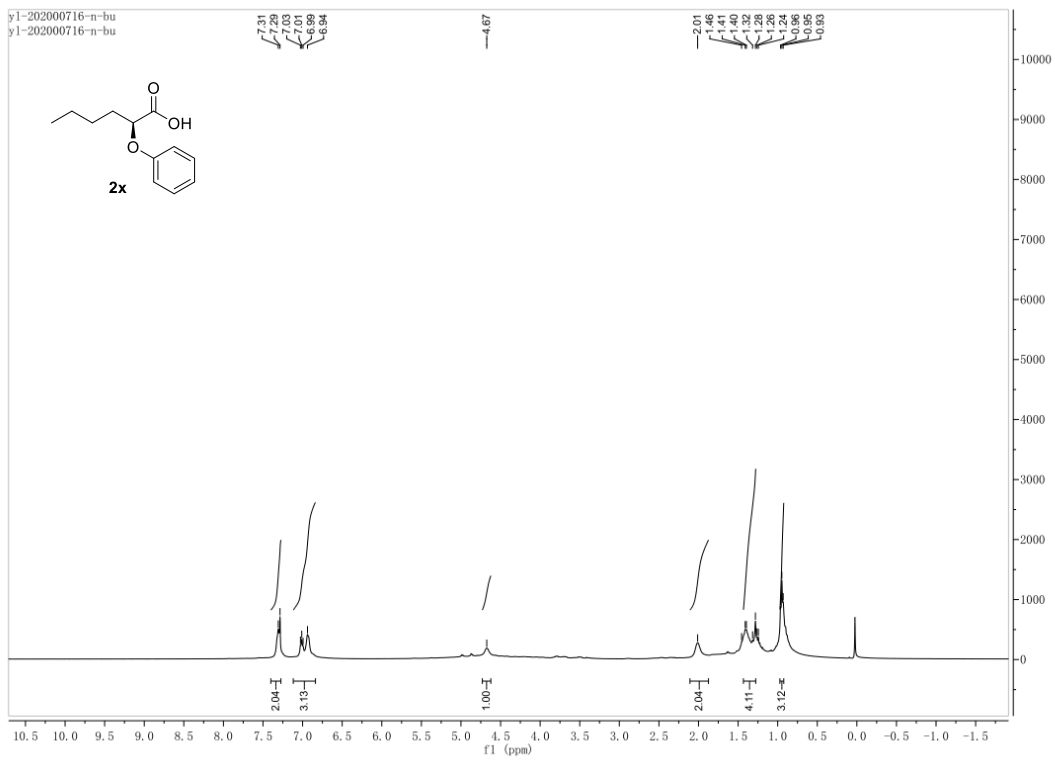

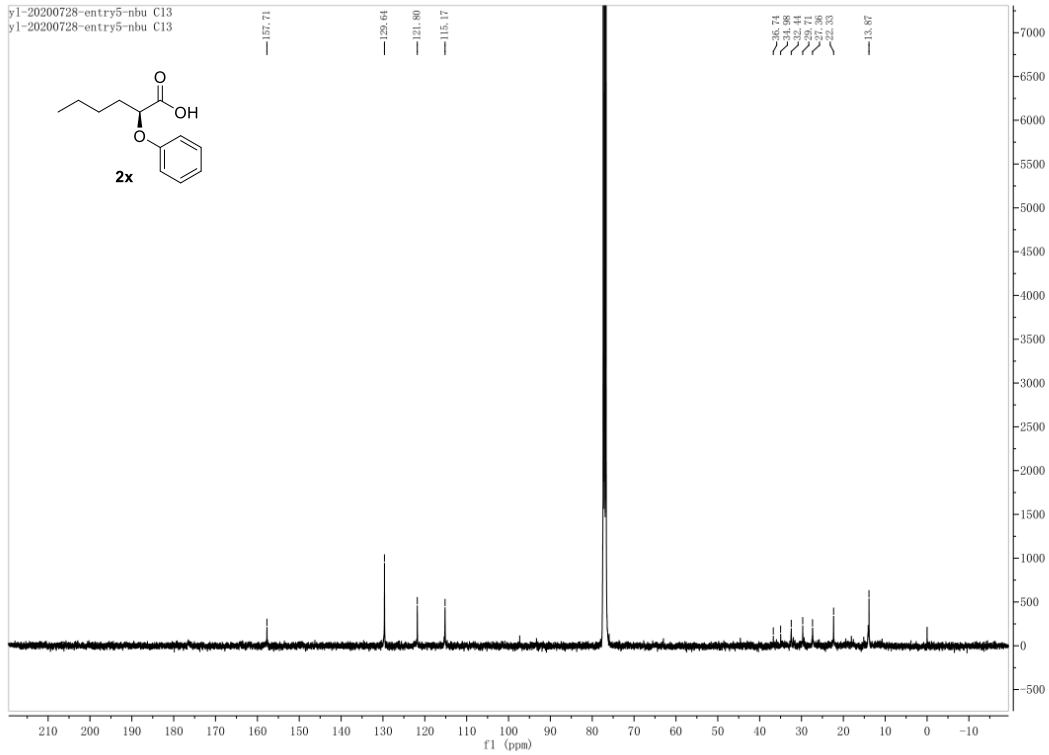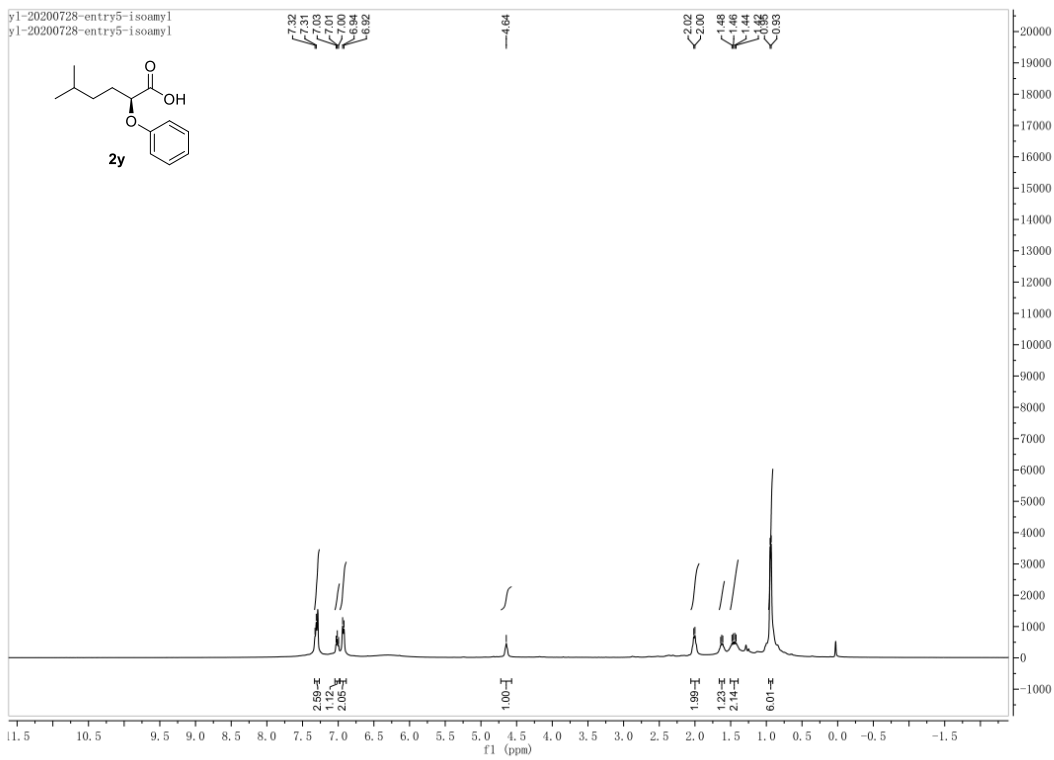



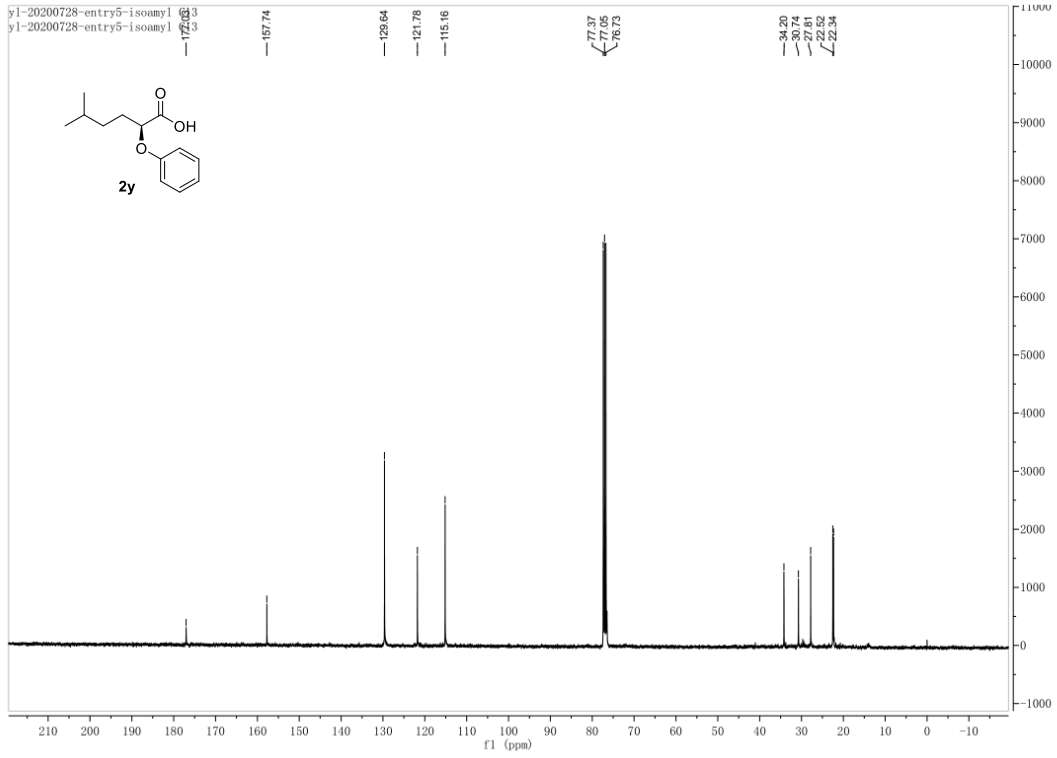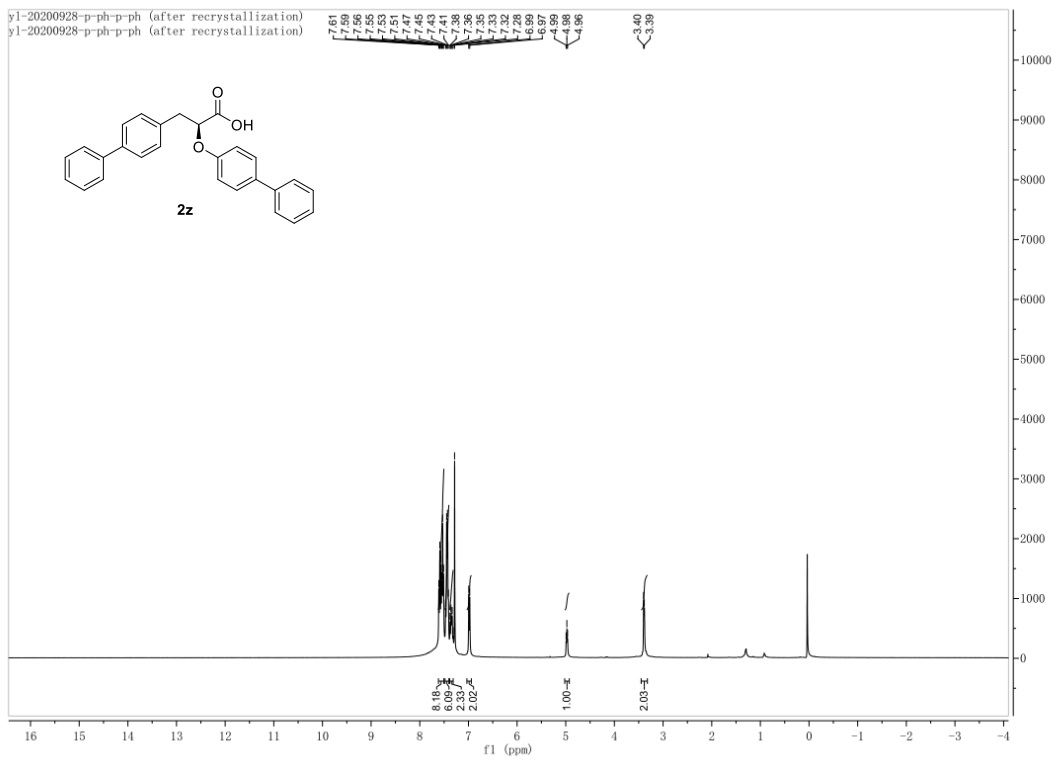

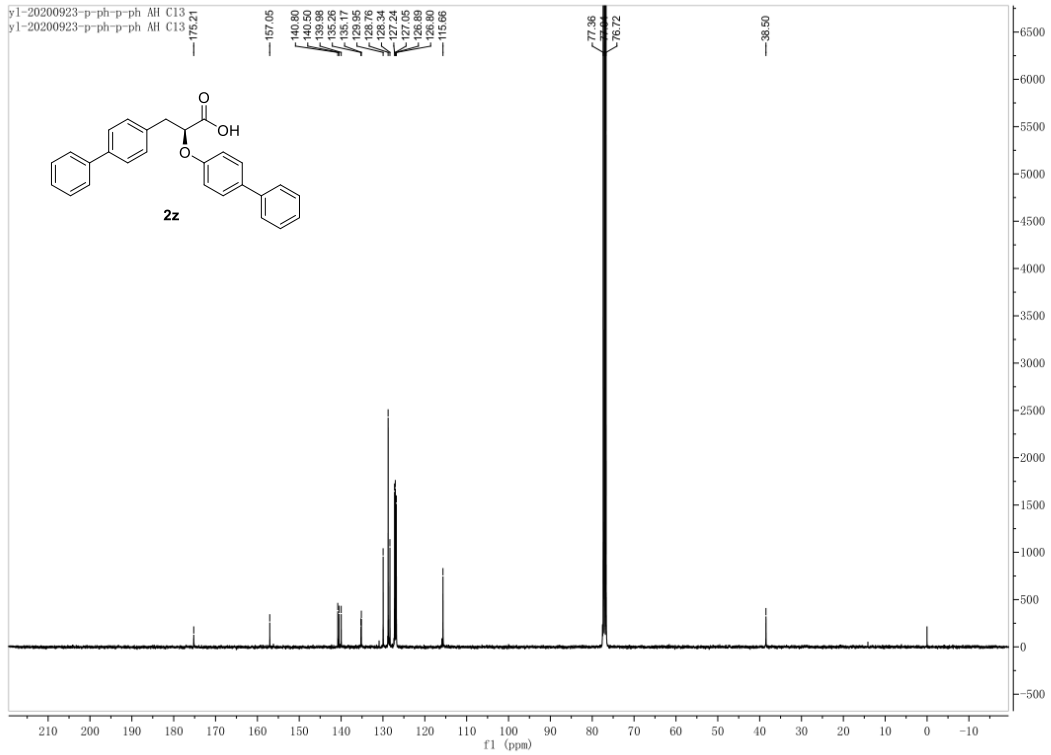

## 7. HPLC spectra

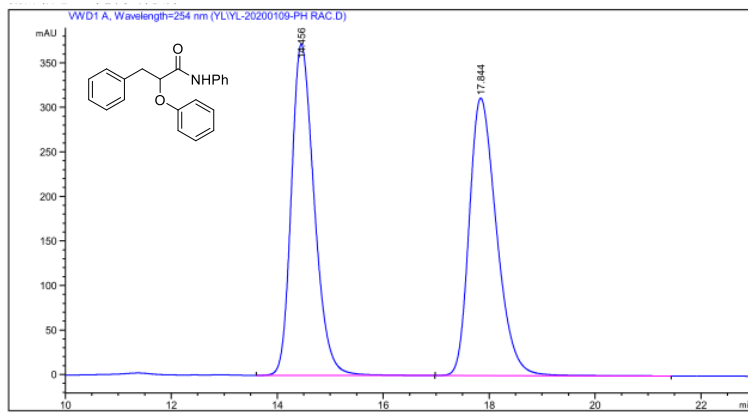

| # | [min]  | [mAU*s]   | [mAU]     | %       |
|---|--------|-----------|-----------|---------|
| 1 | 14.456 | 1.11621e4 | 371.98468 | 50.0611 |
| 2 | 17.844 | 1.11348e4 | 311.61880 | 49.9389 |

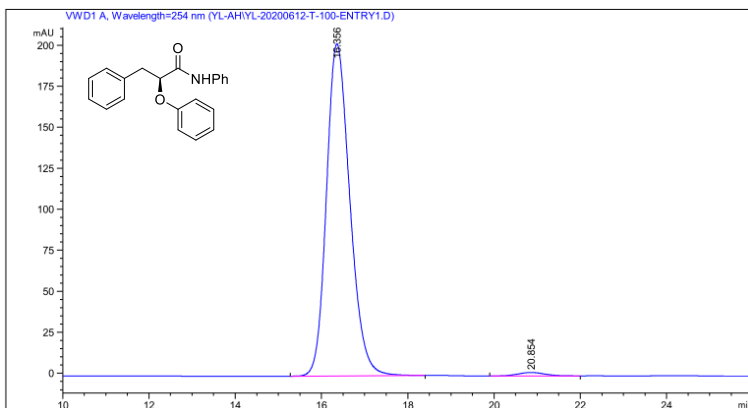

| # | [min]  |   |    | [mAU*s]    | [mAU]     | %       |
|---|--------|---|----|------------|-----------|---------|
| 1 | 16.356 | 1 | BB | 7633.09668 | 202.41315 | 98.8278 |
| 2 | 20.854 | 1 | BB | 90.53281   | 2.09149   | 1.1722  |

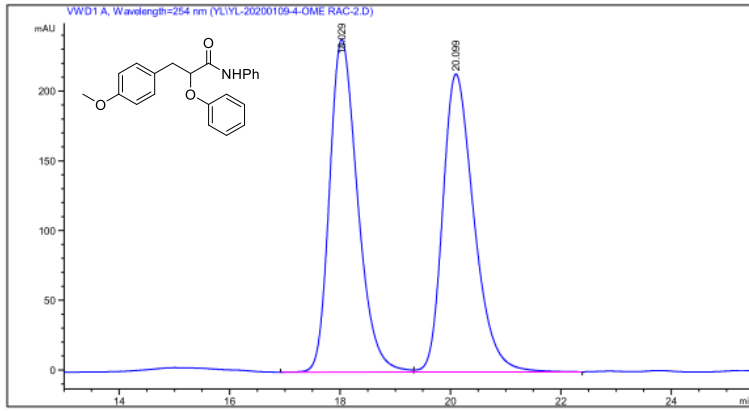

| # | [min]  |   |    | [mAU*s]    | [mAU]     | %       |
|---|--------|---|----|------------|-----------|---------|
| 1 | 18.029 | 1 | BV | 8419.21973 | 238.53062 | 50.1058 |
| 2 | 20.099 | 1 | VB | 8383.66113 | 213.67374 | 49.8942 |

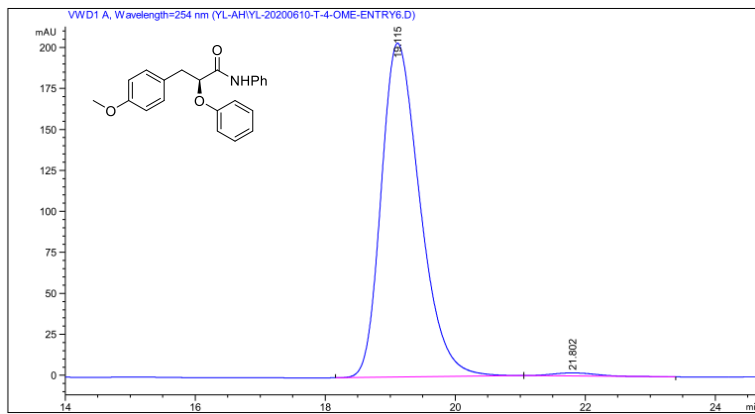

| # | [min]  |   |    | [mAU*s]    | [mAU]     | %       |
|---|--------|---|----|------------|-----------|---------|
| 1 | 19.115 | 1 | BB | 8427.38770 | 203.73251 | 98.9535 |
| 2 | 21.802 | 1 | BB | 89.12537   | 1.88190   | 1.0465  |

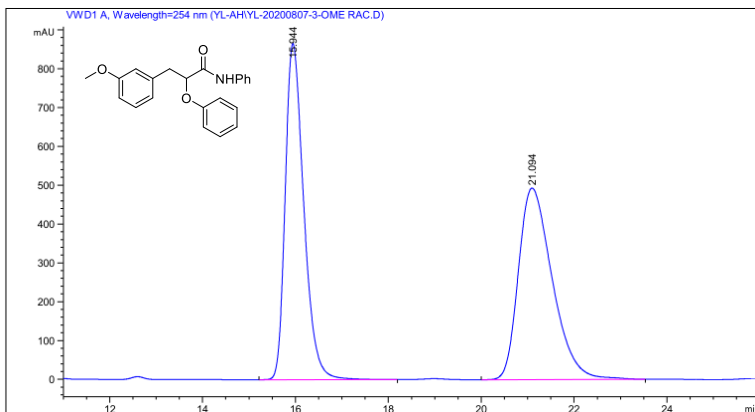

| # | [min]     | [min]  | [mAU*s]   | [mAU]     | %       |
|---|-----------|--------|-----------|-----------|---------|
| 1 | 15.944 BB | 0.4260 | 2.39787e4 | 866.12836 | 49.0141 |
| 2 | 21.094 BB | 0.7771 | 2.49433e4 | 493.16397 | 50.9859 |

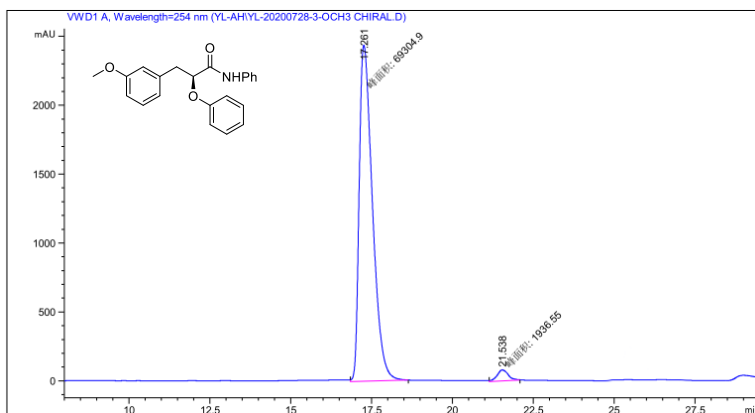

| # | [min]       | [min] | [mAU*s]   | [mAU]      | %       |
|---|-------------|-------|-----------|------------|---------|
| 1 | 12.633 1 MM |       | 2.75112e4 | 1032.49316 | 48.5535 |
| 2 | 13.844 1 VB |       | 2.91504e4 | 995.45007  | 51.4465 |

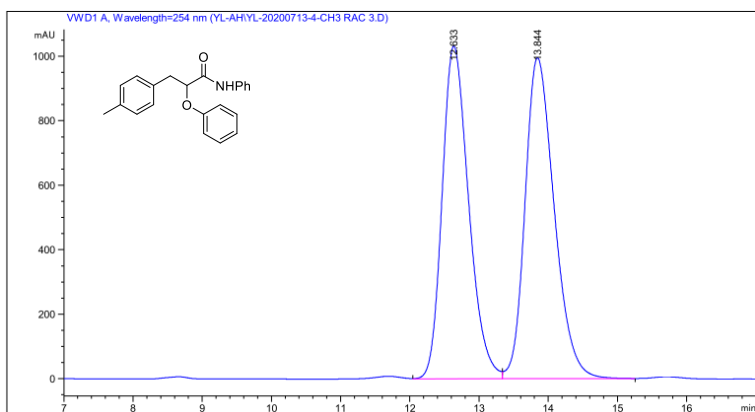

| # | [min]       | [min] | [mAU*s]   | [mAU]      | %       |
|---|-------------|-------|-----------|------------|---------|
| 1 | 12.633 1 VV |       | 2.75112e4 | 1032.49316 | 48.5535 |
| 2 | 13.844 1 VB |       | 2.91504e4 | 995.45007  | 51.4465 |

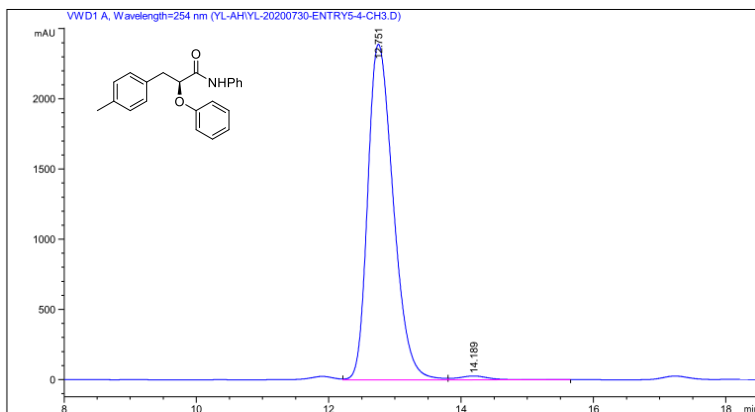

| # | [min]  |      | [mAU*s]   | [mAU]      | %       |
|---|--------|------|-----------|------------|---------|
| 1 | 12.751 | 1 VV | 6.39448e4 | 2390.45239 | 98.7059 |
| 2 | 14.189 | 1 VB | 838.33112 | 26.98314   | 1.2941  |

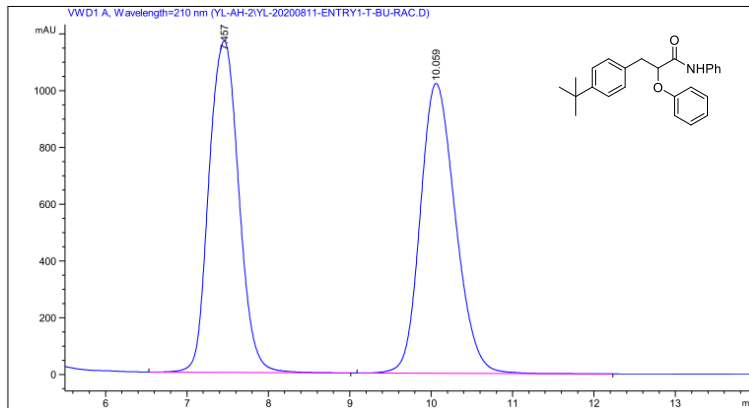

| # | [min]  |      | [mAU*s]   | [mAU]      | %       |
|---|--------|------|-----------|------------|---------|
| 1 | 7.457  | 1 BB | 2.97251e4 | 1167.68933 | 49.2924 |
| 2 | 10.059 | 1 BB | 3.05786e4 | 1021.22290 | 50.7076 |

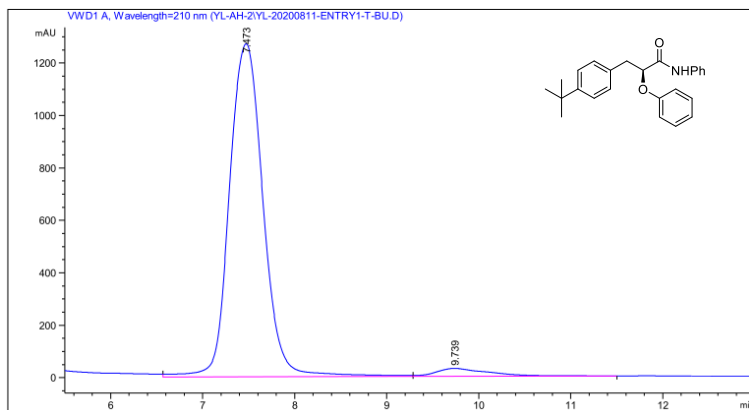

| # | [min] |      | [mAU*s]    | [mAU]      | %       |
|---|-------|------|------------|------------|---------|
| 1 | 7.473 | 1 VV | 3.23510e4  | 1270.05847 | 96.3340 |
| 2 | 9.739 | 1 VB | 1231.11536 | 30.46997   | 3.6660  |

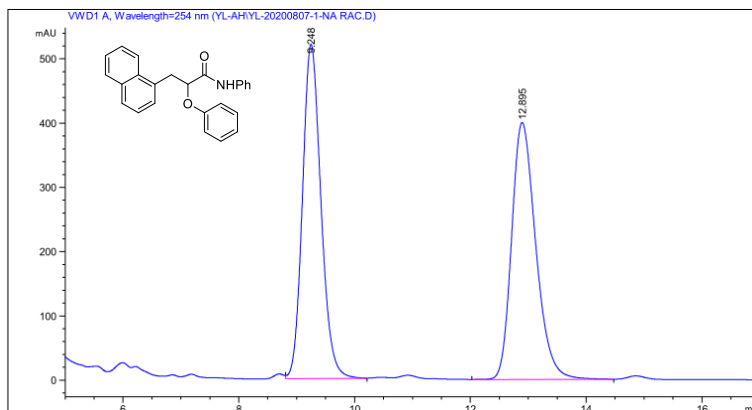

| # | [min]  |    | [min]  | [mAU*s]   | [mAU]     | %       |
|---|--------|----|--------|-----------|-----------|---------|
| 1 | 9.248  | VB | 0.3408 | 1.15434e4 | 520.37146 | 49.9124 |
| 2 | 12.895 | BB | 0.4461 | 1.15839e4 | 399.75323 | 50.0876 |

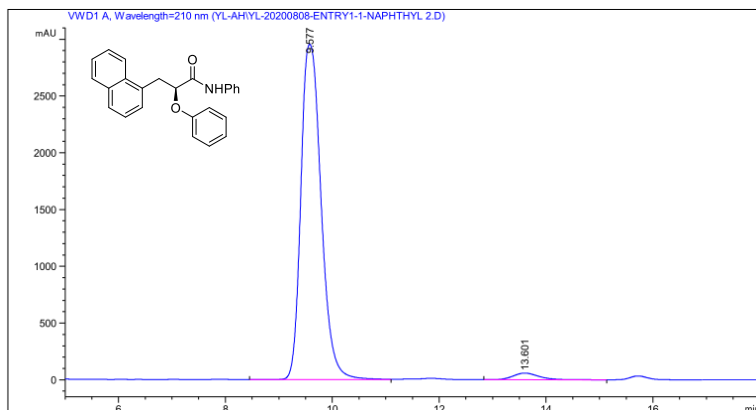

| # | [min]  |      | [mAU*s]    | [mAU]      | %       |
|---|--------|------|------------|------------|---------|
| 1 | 9.577  | 1 BV | 7.77235e4  | 2954.75293 | 97.5153 |
| 2 | 13.601 | 1 BB | 1980.39404 | 58.49048   | 2.4847  |

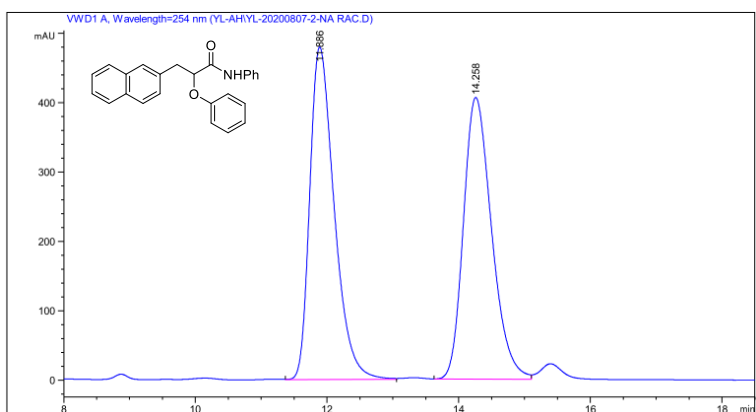

| # | [min]  |    | [min]  | [mAU*s]   | [mAU]     | %       |
|---|--------|----|--------|-----------|-----------|---------|
| 1 | 11.886 | VV | 0.3948 | 1.23524e4 | 479.14896 | 50.5720 |
| 2 | 14.258 | BV | 0.4600 | 1.20730e4 | 405.90540 | 49.4280 |

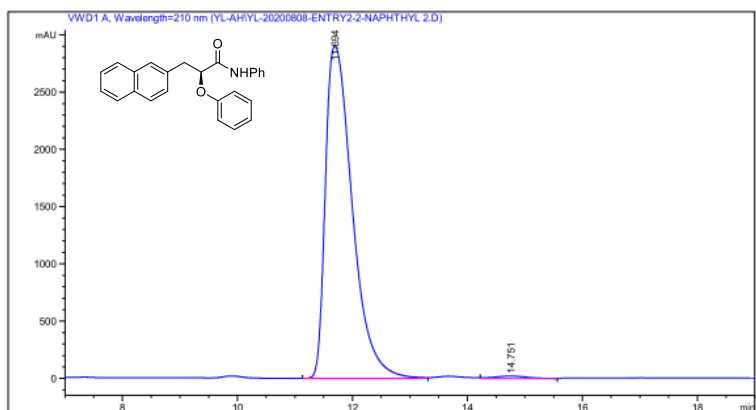

| # | [min]  |      | [mAU*s]   | [mAU]      | %       |
|---|--------|------|-----------|------------|---------|
| 1 | 11.694 | 1 BV | 9.42913e4 | 2900.42627 | 99.1094 |
| 2 | 14.751 | 1 VB | 847.27905 | 21.02848   | 0.8906  |

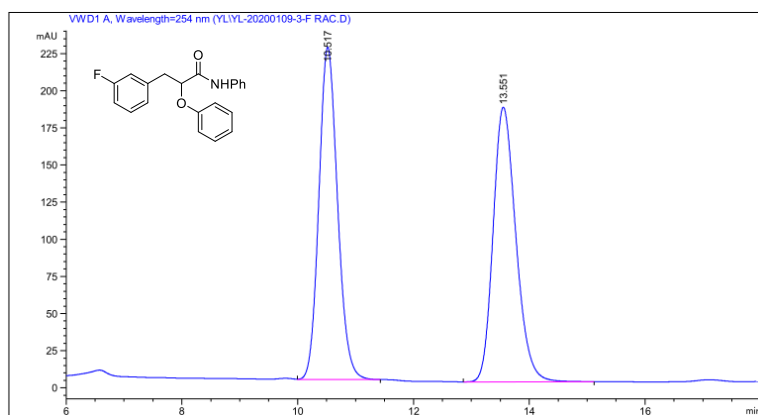

| # | [min]  | [mAU*s]    | [mAU]     | %       |
|---|--------|------------|-----------|---------|
| 1 | 10.517 | 5010.32080 | 223.72888 | 49.7766 |
| 2 | 13.551 | 5055.29883 | 184.92642 | 50.2234 |

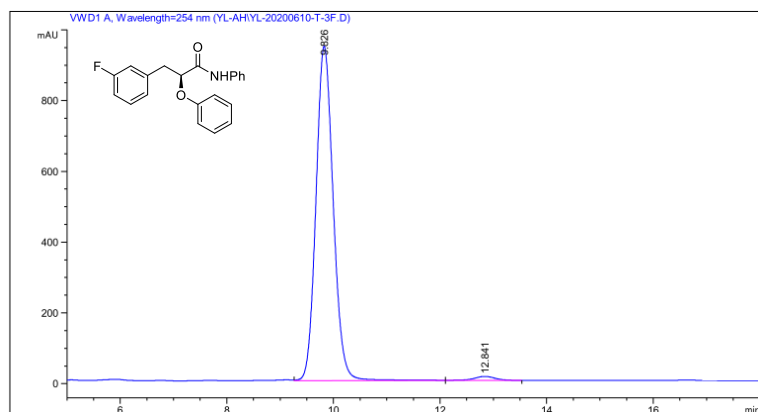

| # | [min]  | [mAU*s]   | [mAU]     | %       |
|---|--------|-----------|-----------|---------|
| 1 | 9.826  | 2.12035e4 | 945.15222 | 98.6637 |
| 2 | 12.841 | 287.18787 | 10.94187  | 1.3363  |

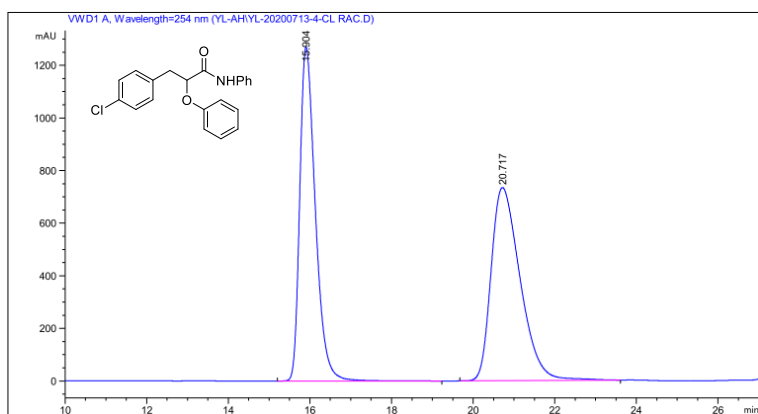

| # | [min]  | [mAU*s]   | [mAU]      | %       |
|---|--------|-----------|------------|---------|
| 1 | 15.904 | 3.36264e4 | 1269.64490 | 48.1242 |
| 2 | 20.717 | 3.62478e4 | 734.32025  | 51.8758 |

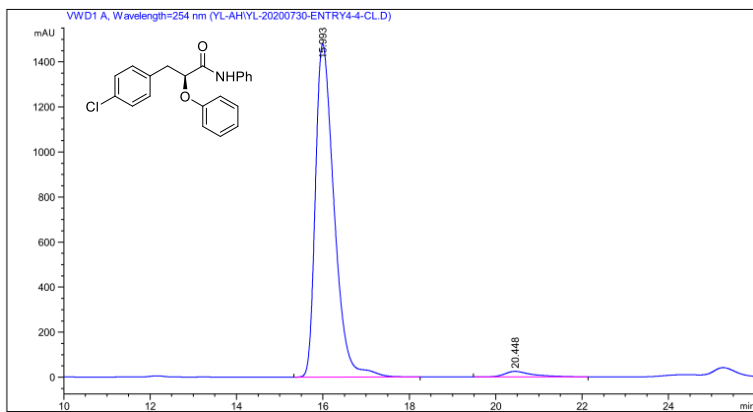

| # | [min]  | [mAU*s]    | [mAU]      | %       |
|---|--------|------------|------------|---------|
| 1 | 15.993 | 4.43559e4  | 1478.90100 | 97.5475 |
| 2 | 20.448 | 1115.17395 | 24.90404   | 2.4525  |

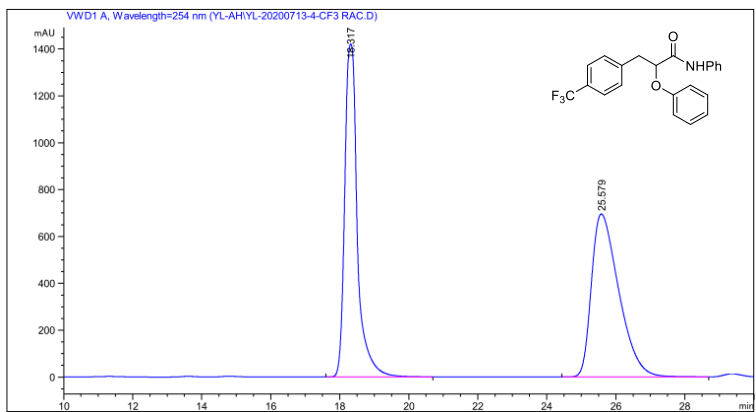

| # | [min]  | [mAU*s]   | [mAU]      | %       |
|---|--------|-----------|------------|---------|
| 1 | 18.317 | 3.60398e4 | 1421.15356 | 48.4410 |
| 2 | 25.579 | 3.83596e4 | 695.75464  | 51.5590 |

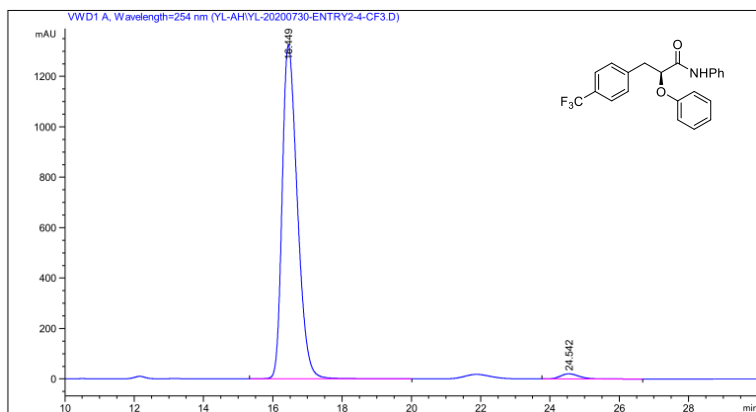

| # | [min]  | [mAU*s]   | [mAU]      | %       |
|---|--------|-----------|------------|---------|
| 1 | 16.449 | 4.01037e4 | 1323.93127 | 98.0609 |
| 2 | 24.542 | 793.02222 | 20.49789   | 1.9391  |



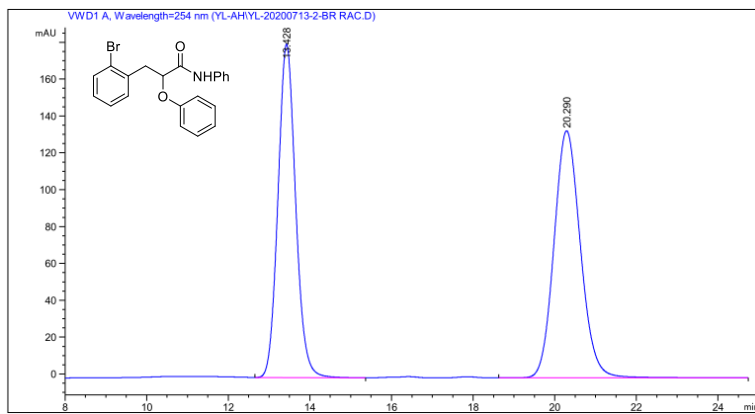

| # | [min]  | [mAU*s]    | [mAU]     | %       |
|---|--------|------------|-----------|---------|
| 1 | 13.428 | 5439.04883 | 180.97034 | 47.4403 |
| 2 | 20.290 | 6025.99072 | 134.07500 | 52.5597 |

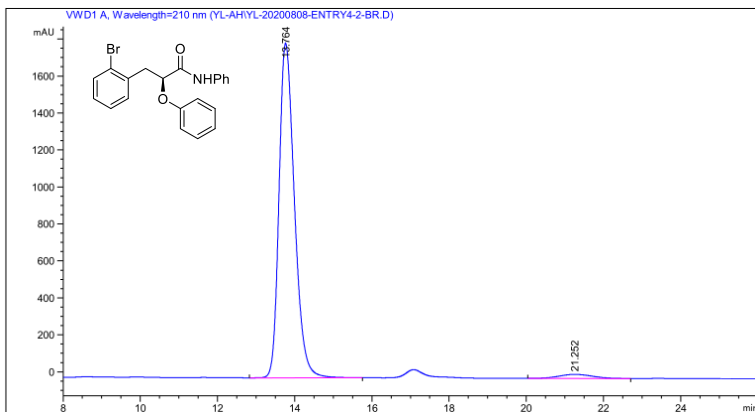

| # | [min]  | [mAU*s]    | [mAU]      | %       |
|---|--------|------------|------------|---------|
| 1 | 13.764 | 5.01149e4  | 1809.73901 | 97.4500 |
| 2 | 21.252 | 1311.37085 | 21.95840   | 2.5500  |

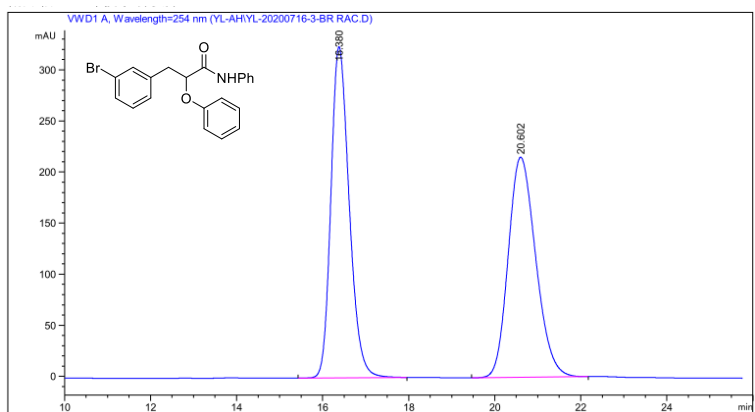

| # | [min]  | [mAU*s]    | [mAU]     | %       |
|---|--------|------------|-----------|---------|
| 1 | 16.380 | 9565.92285 | 324.09955 | 49.9932 |
| 2 | 20.602 | 9568.51270 | 215.48250 | 50.0068 |

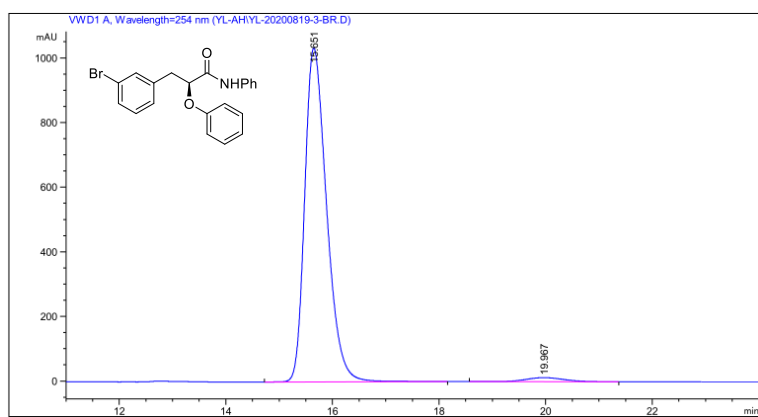

| # | [min]  | [min] | [mAU*s] | [mAU]     | %          |         |
|---|--------|-------|---------|-----------|------------|---------|
| 1 | 15.651 | BB    | 0.4379  | 2.93947e4 | 1033.24084 | 97.9238 |
| 2 | 19.967 | BB    | 0.7639  | 623.23676 | 12.51628   | 2.0762  |

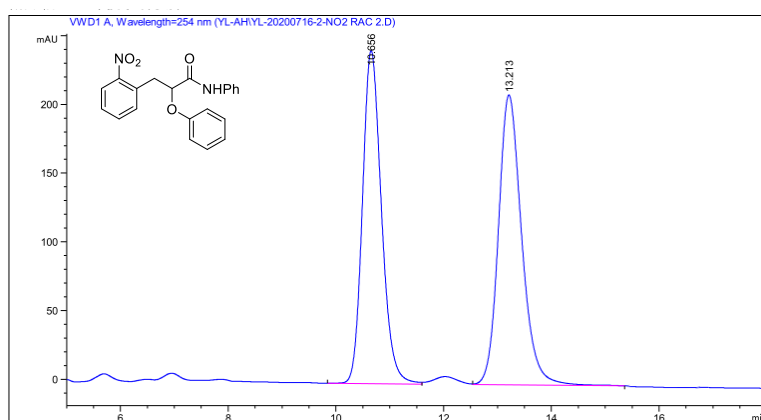

| # | [min]  |   | [mAU*s] | [mAU]      | %         |         |
|---|--------|---|---------|------------|-----------|---------|
| 1 | 10.656 | 1 | BV      | 5924.78223 | 242.27364 | 48.4093 |
| 2 | 13.213 | 1 | VB      | 6314.15527 | 210.75914 | 51.5907 |

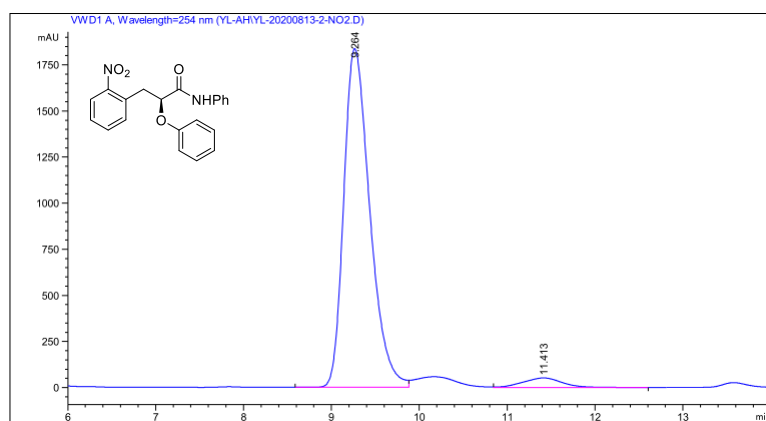

| 峰 # | 保留时间 [min] | 类型 | 峰宽 [min] | 峰面积 [mAU*s] | 峰高 [mAU]   | 峰面积 %   |
|-----|------------|----|----------|-------------|------------|---------|
| 1   | 9.264      | BV | 0.3166   | 3.78936e4   | 1837.24390 | 96.0075 |
| 2   | 11.413     | VB | 0.4571   | 1575.79480  | 51.48765   | 3.9925  |

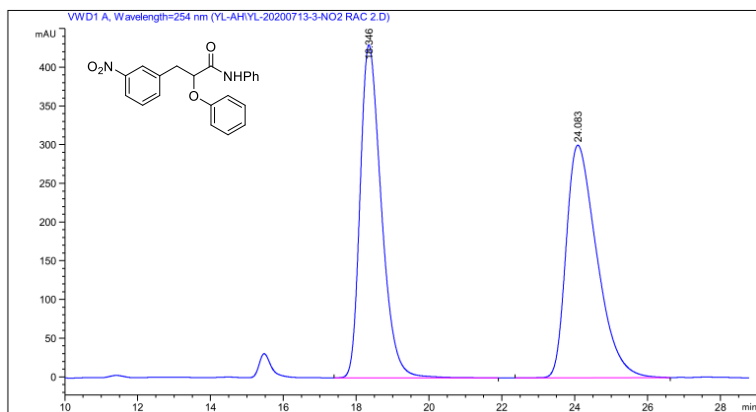

| # | [min]  | [mAU*s]   | [mAU]     | %       |
|---|--------|-----------|-----------|---------|
| 1 | 18.346 | 1.73493e4 | 430.00061 | 49.6739 |
| 2 | 24.083 | 1.75772e4 | 300.38028 | 50.3261 |

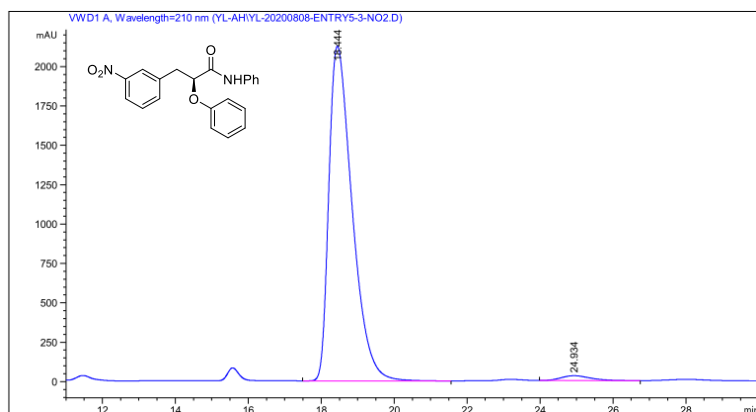

| # | [min]  | [mAU*s]    | [mAU]      | %       |
|---|--------|------------|------------|---------|
| 1 | 18.444 | 9.42284e4  | 2125.34717 | 98.2158 |
| 2 | 24.934 | 1711.75049 | 30.70453   | 1.7842  |

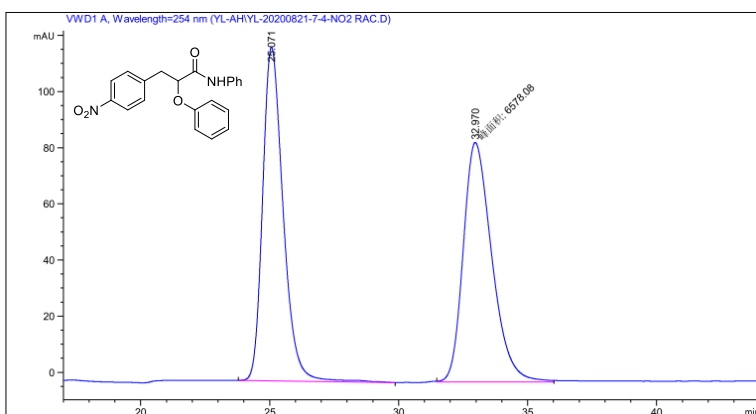

| 峰 # | 保留时间 [min] | 类型 | 峰宽 [min] | 峰面积 [mAU*s] | 峰高 [mAU]  | 峰面积 %   |
|-----|------------|----|----------|-------------|-----------|---------|
| 1   | 25.071     | BB | 0.8481   | 6570.88721  | 118.82989 | 49.9727 |
| 2   | 32.970     | MM | 1.2852   | 6578.07617  | 85.30623  | 50.0273 |

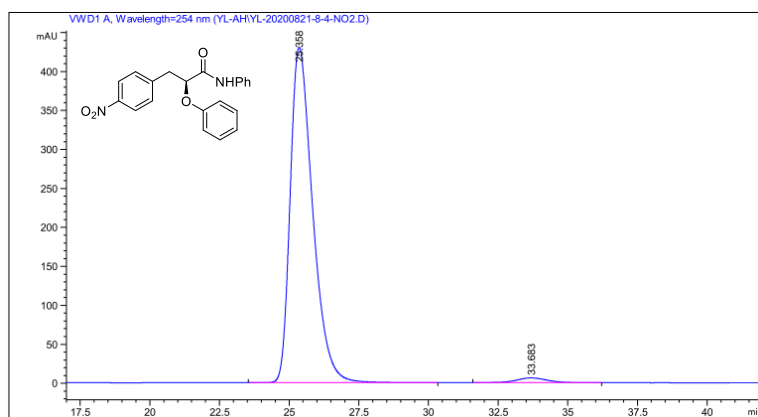

| 峰 # | 保留时间 [min] | 类型 | 峰宽 [min] | 峰面积 [mAU*s] | 峰高 [mAU]  | 峰面积 %   |
|-----|------------|----|----------|-------------|-----------|---------|
| 1   | 25.358     | BB | 0.8578   | 2.41147e4   | 430.29785 | 98.0319 |
| 2   | 33.683     | BB | 1.1100   | 484.12451   | 6.13918   | 1.9681  |

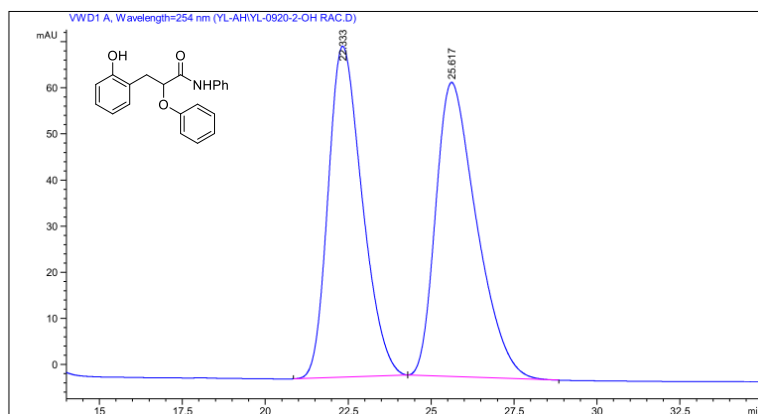

| 峰 # | 保留时间 [min] | 类型 | 峰宽 [min] | 峰面积 [mAU*s] | 峰高 [mAU] | 峰面积 %   |
|-----|------------|----|----------|-------------|----------|---------|
| 1   | 22.333     | BB | 1.0828   | 5126.80029  | 71.81991 | 48.3935 |
| 2   | 25.617     | BB | 1.2794   | 5467.18945  | 63.82139 | 51.6065 |

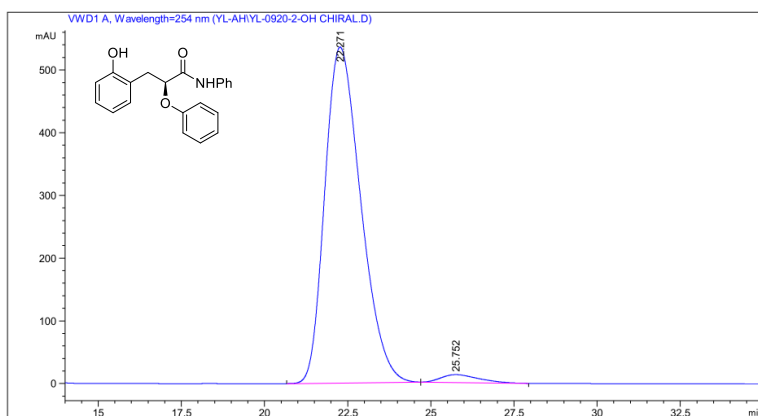

| 峰 # | 保留时间 [min] | 类型 | 峰宽 [min] | 峰面积 [mAU*s] | 峰高 [mAU]  | 峰面积 %   |
|-----|------------|----|----------|-------------|-----------|---------|
| 1   | 22.271     | BB | 1.1664   | 4.02789e4   | 535.60815 | 97.6476 |
| 2   | 25.752     | BB | 1.1390   | 970.35370   | 12.55016  | 2.3524  |

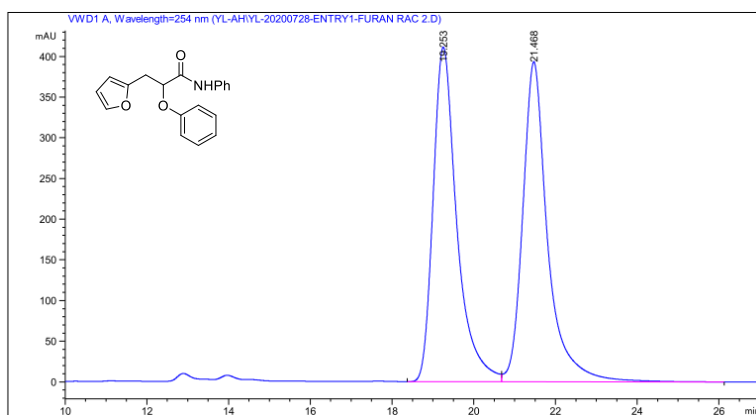

| # | [min]  |   |    | [mAU*s]   | [mAU]     | %       |
|---|--------|---|----|-----------|-----------|---------|
| 1 | 19.253 | 1 | BV | 1.65651e4 | 411.12802 | 49.8287 |
| 2 | 21.468 | 1 | VB | 1.66790e4 | 393.25052 | 50.1713 |

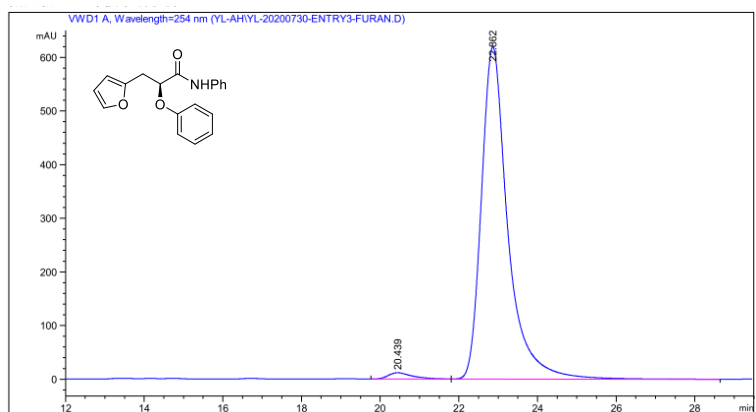

| # | [min]  |   |    | [mAU*s]   | [mAU]     | %       |
|---|--------|---|----|-----------|-----------|---------|
| 1 | 20.439 | 1 | BB | 499.55112 | 11.76875  | 1.6990  |
| 2 | 22.862 | 1 | BB | 2.89036e4 | 619.23315 | 98.3010 |

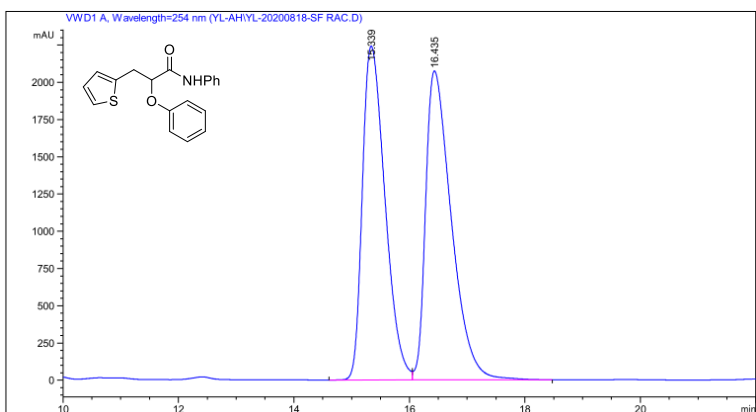

| # | [min]  |   |    | [mAU*s]   | [mAU]      | %       |
|---|--------|---|----|-----------|------------|---------|
| 1 | 15.339 | 1 | BV | 6.10272e4 | 2241.39893 | 48.7293 |
| 2 | 16.435 | 1 | VB | 6.42101e4 | 2074.55322 | 51.2707 |

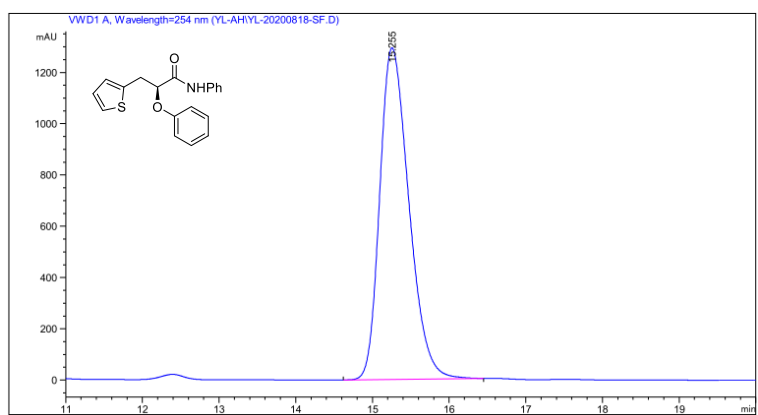

| # | [min]  | [mAU*s]   | [mAU]      | %        |
|---|--------|-----------|------------|----------|
| 1 | 15.255 | 3.41322e4 | 1293.49548 | 100.0000 |

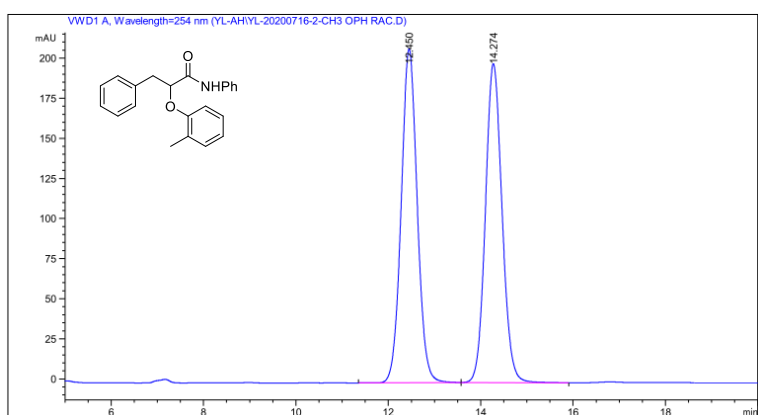

| # | [min]  | [mAU*s]    | [mAU]     | %       |
|---|--------|------------|-----------|---------|
| 1 | 12.450 | 5004.16504 | 208.01425 | 50.1476 |
| 2 | 14.274 | 4974.70508 | 198.77635 | 49.8524 |

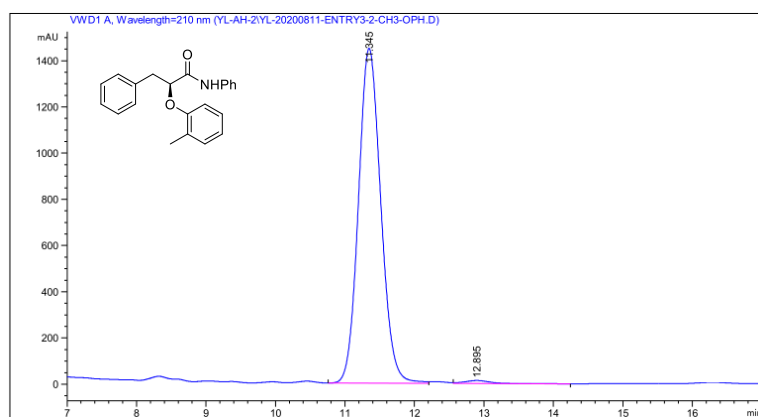

| # | [min]  | [mAU*s]   | [mAU]      | %       |
|---|--------|-----------|------------|---------|
| 1 | 11.345 | 3.23429e4 | 1449.16553 | 99.0043 |
| 2 | 12.895 | 325.28265 | 12.77266   | 0.9957  |

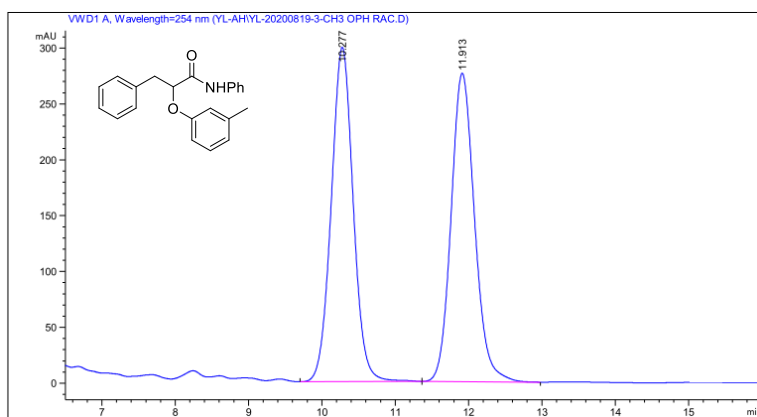

| # | [min]  | [min] | [mAU*s] | [mAU]      | %         |         |
|---|--------|-------|---------|------------|-----------|---------|
| 1 | 10.277 | BB    | 0.3200  | 6236.04785 | 299.35339 | 50.3699 |
| 2 | 11.913 | BB    | 0.3436  | 6144.44824 | 276.12079 | 49.6301 |

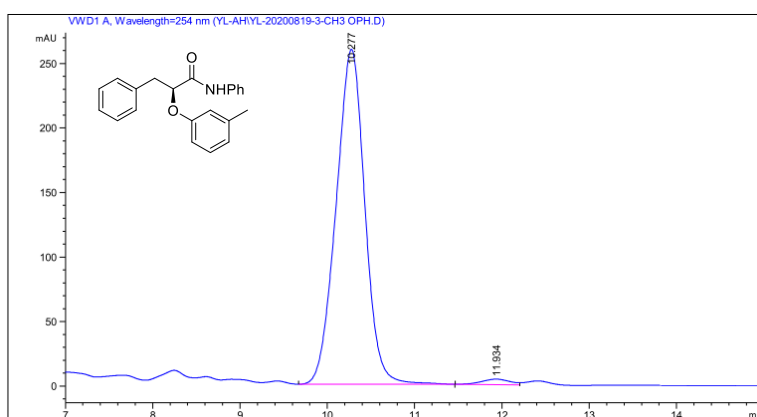

| # | [min]  | [min] | [mAU*s] | [mAU]      | %         |         |
|---|--------|-------|---------|------------|-----------|---------|
| 1 | 10.277 | BB    | 0.3466  | 5932.52295 | 259.57349 | 98.4209 |
| 2 | 11.934 | BV    | 0.3417  | 95.18607   | 4.24379   | 1.5791  |

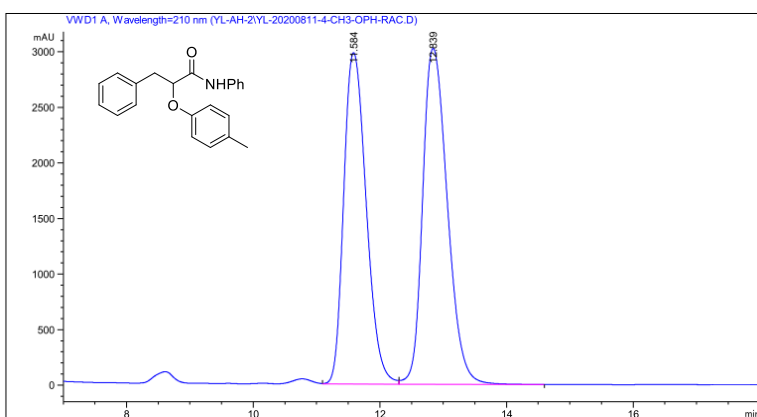

| # | [min]  | [min] | [mAU*s]   | [mAU]      | %       |
|---|--------|-------|-----------|------------|---------|
| 1 | 11.584 | 1 VV  | 7.34637e4 | 2982.30029 | 47.3285 |
| 2 | 12.839 | 1 VB  | 8.17572e4 | 3023.28638 | 52.6715 |

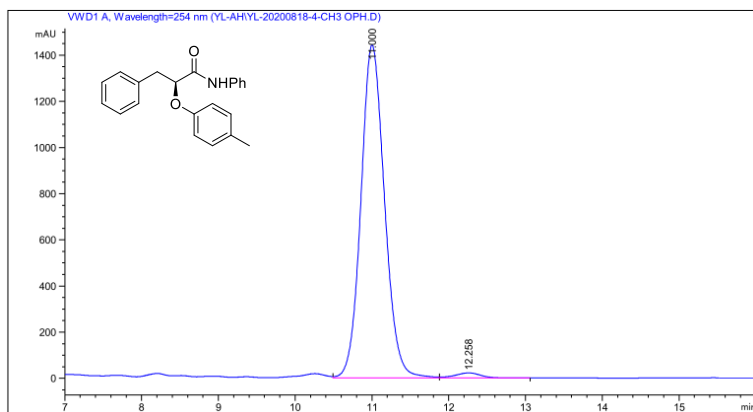

| # | [min]  |      | [mAU*s]   | [mAU]      | %       |
|---|--------|------|-----------|------------|---------|
| 1 | 11.000 | 1 VV | 3.07398e4 | 1442.26489 | 98.3754 |
| 2 | 12.258 | 1 VB | 507.64709 | 21.94230   | 1.6246  |

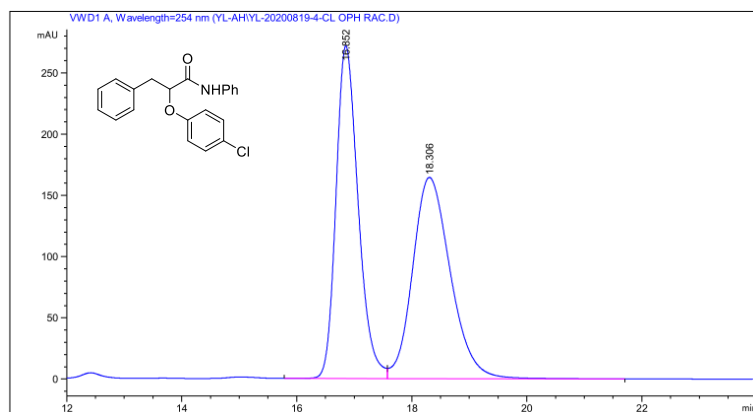

| # | [min]  |    | [min]  | [mAU*s]    | [mAU]     | %       |
|---|--------|----|--------|------------|-----------|---------|
| 1 | 16.852 | BV | 0.4140 | 7286.13916 | 271.61575 | 49.2759 |
| 2 | 18.306 | VB | 0.7035 | 7500.28711 | 164.31425 | 50.7241 |

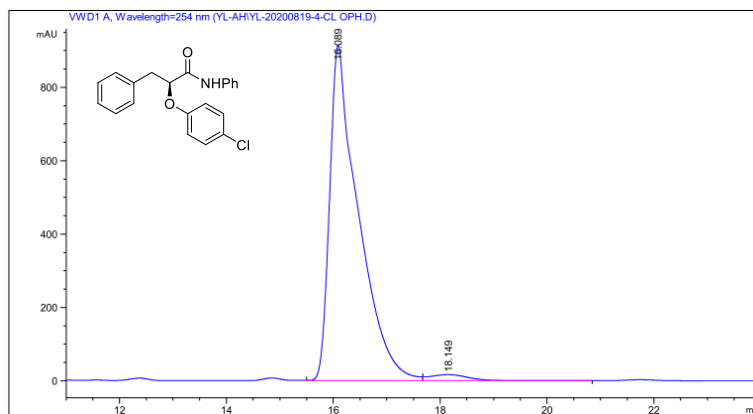

| # | [min]  |    | [min]  | [mAU*s]   | [mAU]     | %       |
|---|--------|----|--------|-----------|-----------|---------|
| 1 | 16.089 | VV | 0.5005 | 3.42088e4 | 914.24762 | 97.6014 |
| 2 | 18.149 | VB | 0.7582 | 840.69275 | 16.58998  | 2.3986  |



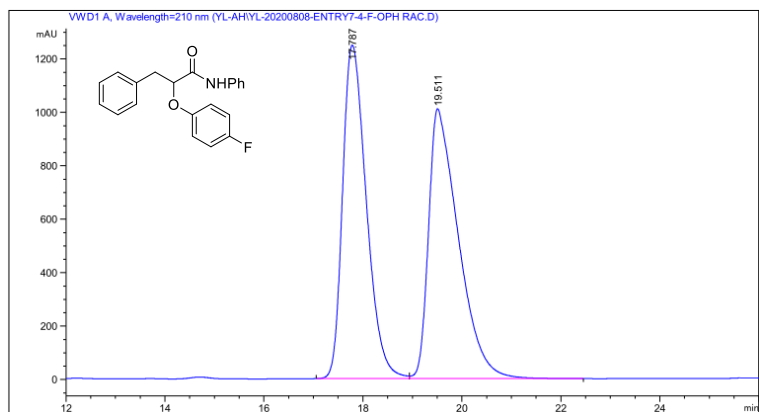

| # | [min]  | [mAU*s]   | [mAU]      | %       |
|---|--------|-----------|------------|---------|
| 1 | 17.787 | 4.16202e4 | 1248.31604 | 49.6598 |
| 2 | 19.511 | 4.21905e4 | 1010.03119 | 50.3402 |

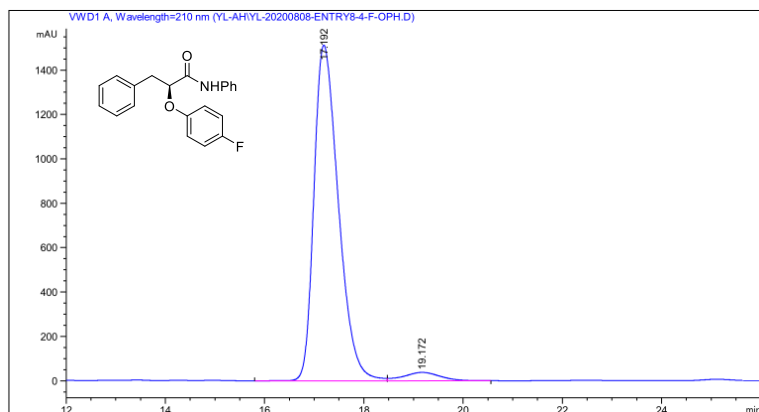

| # | [min]  | [mAU*s]    | [mAU]      | %       |
|---|--------|------------|------------|---------|
| 1 | 17.192 | 5.16933e4  | 1511.80249 | 96.4185 |
| 2 | 19.172 | 1920.15015 | 37.73603   | 3.5815  |

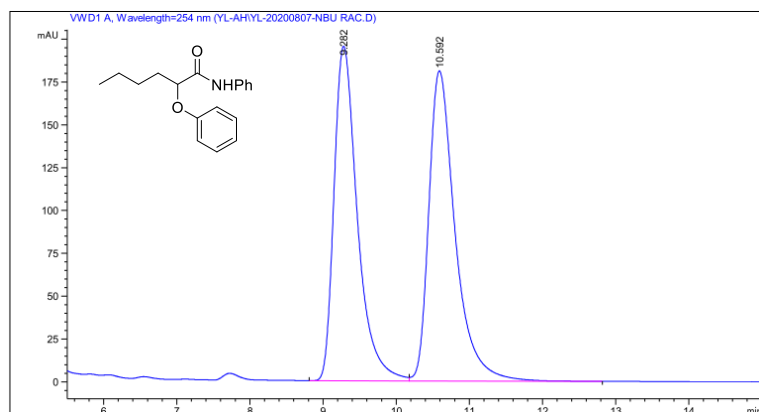

| # | [min]  | [min] | [mAU*s] | [mAU]      | %         |         |
|---|--------|-------|---------|------------|-----------|---------|
| 1 | 9.282  | BV    | 0.3391  | 4334.91016 | 195.19812 | 48.9162 |
| 2 | 10.592 | VB    | 0.3778  | 4527.00049 | 180.96936 | 51.0838 |

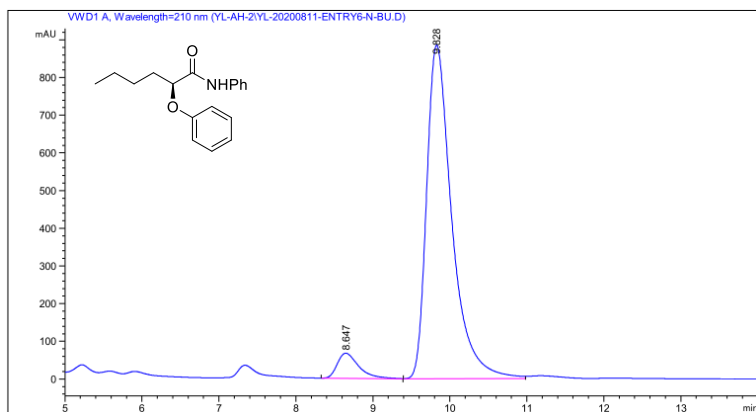

| # | [min] |      | [mAU*s]    | [mAU]     | %       |
|---|-------|------|------------|-----------|---------|
| 1 | 8.647 | 1 VB | 1301.62415 | 66.89622  | 6.0664  |
| 2 | 9.828 | 1 BV | 2.01546e4  | 885.21307 | 93.9336 |

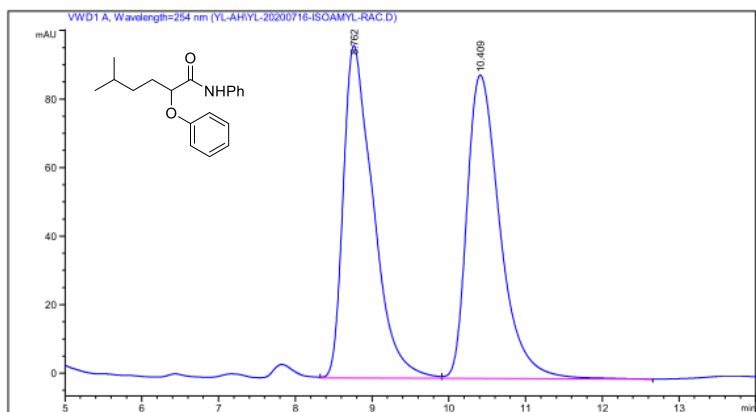

| # | [min]  |      | [mAU*s]    | [mAU]    | %       |
|---|--------|------|------------|----------|---------|
| 1 | 8.762  | 1 VV | 2621.95947 | 96.99129 | 49.7918 |
| 2 | 10.409 | 1 VB | 2643.88965 | 88.54160 | 50.2082 |

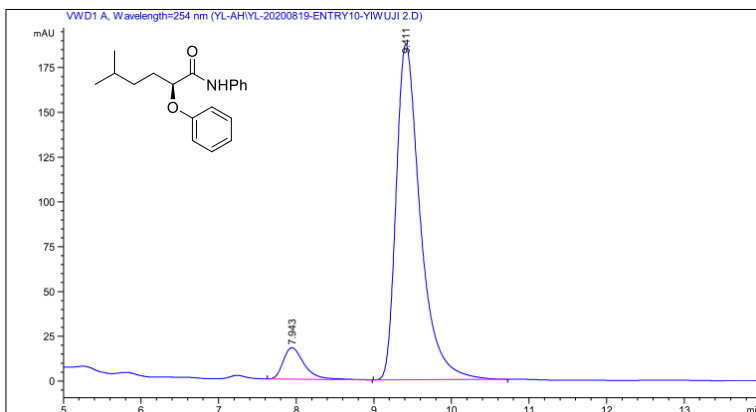

| # | [min] |    | [min]  | [mAU*s]    | [mAU]     | %       |
|---|-------|----|--------|------------|-----------|---------|
| 1 | 7.943 | BB | 0.2874 | 329.58185  | 17.52781  | 7.5501  |
| 2 | 9.411 | BB | 0.3254 | 4035.69653 | 187.25356 | 92.4499 |

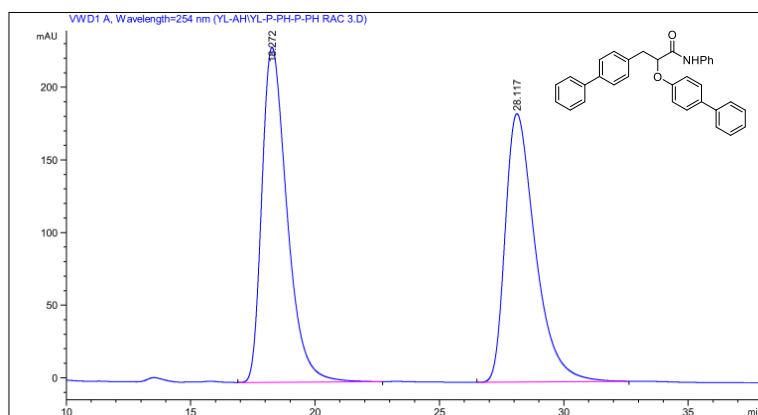

| 峰 # | 保留时间 [min] | 类型 | 峰宽 [min] | 峰面积 [mAU*s] | 峰高 [mAU]  | 峰面积 %   |
|-----|------------|----|----------|-------------|-----------|---------|
| 1   | 18.272     | BB | 1.0744   | 1.61807e4   | 230.65280 | 51.0787 |
| 2   | 28.117     | BB | 1.2706   | 1.54973e4   | 184.76176 | 48.9213 |

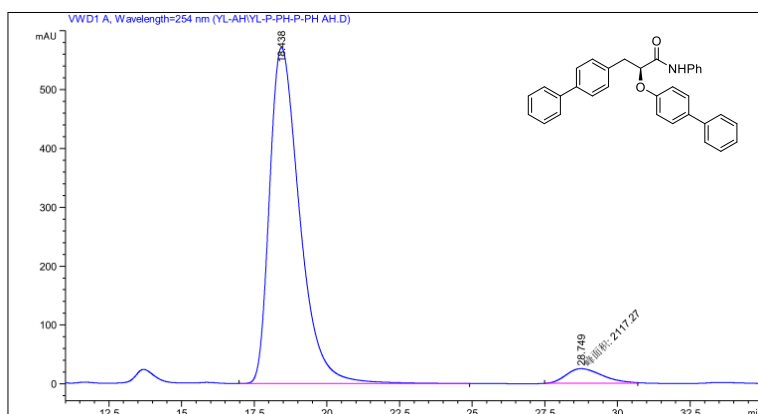

| 峰 # | 保留时间 [min] | 类型 | 峰宽 [min] | 峰面积 [mAU*s] | 峰高 [mAU]  | 峰面积 %   |
|-----|------------|----|----------|-------------|-----------|---------|
| 1   | 18.438     | BB | 1.0990   | 4.09865e4   | 571.29266 | 95.0880 |
| 2   | 28.749     | MM | 1.4293   | 2117.27295  | 24.68872  | 4.9120  |

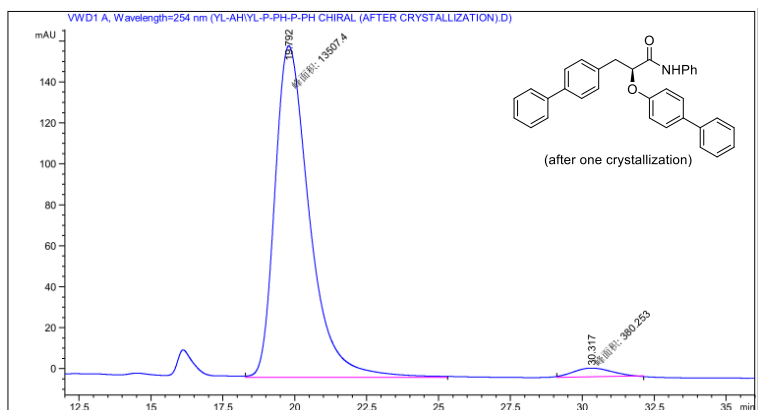

| 峰 # | 保留时间 [min] | 类型 | 峰宽 [min] | 峰面积 [mAU*s] | 峰高 [mAU]  | 峰面积 %   |
|-----|------------|----|----------|-------------|-----------|---------|
| 1   | 19.792     | MM | 1.3917   | 1.35074e4   | 161.76389 | 97.2619 |
| 2   | 30.317     | MM | 1.5090   | 380.25308   | 4.19992   | 2.7381  |
